# Supplementary material
Source: PubMed Central journal article supplement (PMC3065355)

# Asymmetric Ni-Catalyzed Conjugate Allylation of Activated Enones

Joshua D. Sieber and James P. Morken\*

*Department of Chemistry, Merkert Chemistry Center  
Boston College, Chestnut Hill, MA, 02467*

## Supplementary Material

### *Table of Contents*

|                                                                              |      |
|------------------------------------------------------------------------------|------|
| General                                                                      | S-2  |
| Ligand synthesis                                                             | S-3  |
| Substrate synthesis                                                          | S-4  |
| Conjugate allylation procedures                                              | S-9  |
| Conjugate allylation product manipulations                                   | S-33 |
| Conjugate allylation using substrate with tethered phosphino-directing group | S-34 |
| Synthesis and characterization of Ni-enone complex                           | S-37 |
| Labeling experiments...                                                      | S-42 |
| Non-linear effects...                                                        | S-42 |
| <sup>1</sup> H and <sup>13</sup> C NMR data...                               | S-44 |

**General.** Melting points were determined using a Mel-Temp II melting point apparatus and are uncorrected. <sup>1</sup>H NMR spectra were recorded on Gemini-500 (500 MHz), Gemini-400 (400 MHz), or Gemini-300 (300 MHz) spectrometers. Chemical shifts are reported in ppm from tetramethylsilane with the solvent resonance as an internal standard (CDCl<sub>3</sub>: 7.24 ppm, C<sub>6</sub>D<sub>6</sub>: 7.15 ppm). Data are reported as follows: chemical shift, integration, multiplicity (s = singlet, d = doublet, t = triplet, q = quartet, p = pentet, h = hextet, br = broad, m = multiplet), and coupling constants (Hz). <sup>13</sup>C NMR was recorded on a Gemini-400 (100 MHz) instrument, or a Gemini-500 (125 MHz) instrument with complete proton decoupling. Chemical shifts are reported in ppm from tetramethylsilane with the solvent as the internal standard (CDCl<sub>3</sub>: 77.0 ppm, C<sub>6</sub>D<sub>6</sub>: 128.39 ppm). <sup>19</sup>F NMR was recorded on a Gemini-500 (470 MHz) instrument. Chemical shifts are reported in ppm and are referenced to a 0.05% solution of C<sub>6</sub>F<sub>6</sub> (-63.72 ppm) in C<sub>6</sub>D<sub>6</sub>. <sup>31</sup>P NMR was recorded on a Gemini-300 (121 MHz) instrument with complete proton decoupling. Chemical shifts are reported in ppm and are referenced to 85% H<sub>3</sub>PO<sub>4</sub> (0.0 ppm). Low-resolution mass spectrometry was performed by the Boston College, Department of Chemistry Mass Spectrometry Facility. Infrared (IR) spectra were obtained on a Nicolet 210 spectrophotometer. Optical rotations were measured using a Rudolf Research Analytical Autopol IV Polarimeter.

Liquid chromatography was performed using forced flow (flash chromatography) on silica gel (SiO<sub>2</sub>, 40-63 μm) purchased from Silicycle. Thin layer chromatography (TLC) was performed on 250 μm silica gel plates from Silicycle or 200 μm neutral alumina TLC plates from Sorbent Technologies. Visualization was achieved using UV light, phosphomolybdic acid in ethanol, or potassium permanganate in water, each followed by heating.

Analytical chiral gas-liquid chromatography (GLC) was performed on a Hewlett-Packard 6890 series chromatograph equipped with a CTC Analysis Combi Pal autosampler by Leap Technologies (Carrboro, NC), a split mode capillary injection system, a flame ionization detector, and a Supelco β-dex 120 column with helium as the carrier gas. Analytical achiral GLC was performed on a Hewlett-Packard 6890 series chromatograph equipped with a split mode capillary injection system, a flame ionization detector, and a Hewlett-Packard Ultra 1 capillary column (0.33 μm film thickness, 25 m length, 0.2mm ID) with helium as the carrier gas. Analytical chiral supercritical fluid chromatography (SFC) was performed on a Berger Instruments supercritical chromatograph equipped with an Alcott autosampler and a Knauer UV detector.

All reactions were conducted in oven or flame dried glassware under an inert atmosphere of nitrogen or argon. Toluene, *d*<sub>8</sub>-toluene, and *d*<sub>6</sub>-benzene were distilled over CaH<sub>2</sub> and degassed by freeze-pump-thaw cycles prior to use. Anhydrous tetrahydrofuran (THF), methylene chloride, and diethyl ether were purified using a Pure Solv MD-4 solvent purification system from Innovative Technology Inc. by passing the solvent through two activated alumina columns after being purged with Ar. Activated enone substrates used in the conjugate allylation were synthesized by the addition of the desired alkyl-substituted vinyl lithium to the Weinreb amide prepared from the desired cinnamic acid derivative and is described below. Note that the activated enones used in Table 1 and Table 3, entries 1, 3, and 4, were synthesized as previously described (Sieber, J. D.; Liu, S.; Morken, J. P. *J. Am. Chem. Soc.* **2007**, *129*, 2214.). Bis(1,5-cyclooctadiene)nickel(0) was purchased from Strem Chemical Company. 5-fluoro-2-methylbenzaldehyde was purchased from Oakwood Chemicals and used without further purification. All other reagents were purchased from either Fisher or Aldrich Chemical Companies and used directly.

## Ligand Synthesis.

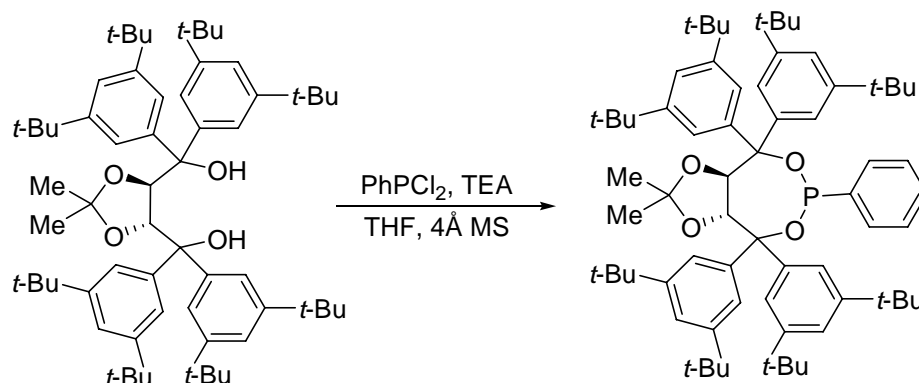

To a mixture of 0.898 g (0.981 mmol) of diol (synthesized from L-tartaric acid according to: Seebach, D.; Beck, A. K.; Keckel, A. *Angew. Chem. Int. Ed.* **2001**, *40*, 92.) and 4 Å molecular sieves in 3.9 mL of THF at 0 °C was added 0.32 ml (2.3 mmol) of triethylamine. Next, 150 µL (1.08 mmol) of dichlorophenylphosphine was added dropwise. The reaction was allowed to warm to room temperature and stirred here for 2 h. The reaction was diluted with Et<sub>2</sub>O, filtered through celite, and concentrated under reduced pressure. Column chromatography (SiO<sub>2</sub>, hexanes:EtOAc) afforded 0.726 g (73%) of phosphonite ligand as a white solid. mp 240-260 °C (decomp.). *R<sub>f</sub>* = 0.40 (SiO<sub>2</sub>, 30:1 hexanes:EtOAc); IR (CH<sub>2</sub>Cl<sub>2</sub> solution): 3075 (m), 2968 (s), 2873 (s), 1797 (w), 1595 (s), 1482 (s), 1369 (s), 1249 (s), 1205 (s), 1167 (s) cm<sup>-1</sup>; <sup>1</sup>H NMR (CDCl<sub>3</sub>): δ 7.96-8.30 (2H, m), 7.67 (2H, s), 7.55 (2H, s), 7.38-7.53 (5H, m), 7.26 (2H, d, *J* = 6.5 Hz), 7.21 (2H, d, *J* = 7.5 Hz), 7.14 (2H, s), 5.60 (1H, dd, *J* = 8.8 Hz, *J* = 3.5 Hz), 4.89 (1H, d, *J* = 8.8 Hz), 1.56 (3H, s) 1.20-1.33 (72H, m), 0.11 (3H, s); <sup>13</sup>C NMR (CDCl<sub>3</sub>): δ 149.8, 149.5, 148.9, 148.8, 146.3, 145.6, 145.5, 142.6, 142.5, 141.6, 140.6, 130.5, 130.1, 129.9, 128.2, 128.1, 123.8, 122.3, 121.6, 120.7, 120.43, 120.38, 120.2, 84.39, 84.36, 84.24, 84.18, 84.09, 83.94, 83.17, 83.13, 35.02, 34.88, 34.77, 34.75, 31.53, 31.48, 31.45, 31.41, 28.09, 23.68. <sup>31</sup>P NMR (CDCl<sub>3</sub>): δ 154.3. LRMS (ESI<sup>+</sup>) Calc'd for C<sub>69</sub>H<sub>97</sub>O<sub>4</sub>P (M + Na + H)<sup>+</sup>: 1044.7 Found (M + Na + H)<sup>+</sup>: 1044.6. [α]<sub>D</sub><sup>20</sup> = -44° (*c* = 0.5, CHCl<sub>3</sub>).

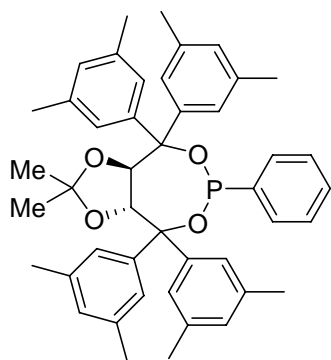

**3,5-(Me)<sub>2</sub>TADDOLPPh.** Prepared in 62% yield. A white solid. mp 116-130 °C (sealed capillary, decomp.). *R<sub>f</sub>* = 0.35 (SiO<sub>2</sub>, 15:1 hexanes:EtOAc); IR (CH<sub>2</sub>Cl<sub>2</sub> solution): 2991 (m), 2920 (s), 2865 (m), 1776 (w), 1599 (s), 1463 (s), 1379 (m), 1252 (m), 1214 (s), 1155 (s) cm<sup>-1</sup>; <sup>1</sup>H NMR (CDCl<sub>3</sub>): δ 7.85-7.94 (2H, m), 7.54 (5H, s), 7.31 (2H, s), 7.12 (2H, s), 7.09 (2H, s), 6.96 (1H, s), 6.91 (2H, s), 6.86 (1H, s), 5.59 (1H, dd, *J* = 8.5 Hz, *J* = 5.5 Hz), 4.81 (1H, d, *J* = 8.5 Hz), 2.35 (6H, s), 2.32 (12H, s), 2.30 (6H, s), 1.62 (3H, s) 0.26 (3H, s); <sup>13</sup>C NMR (CDCl<sub>3</sub>): δ 146.7, 146.1, 141.6, 141.3, 137.1, 136.8, 136.7, 136.2, 130.3, 129.9, 129.7, 129.1, 128.9, 128.7, 128.3, 128.2, 127.2, 126.3, 125.3, 125.2, 111.2, 84.14, 83.23, 83.16, 82.79, 82.55, 82.14, 27.97, 25.08, 21.67, 21.55. <sup>31</sup>P NMR (CDCl<sub>3</sub>): δ 155.7. LRMS (ESI<sup>+</sup>)

Calc'd for C<sub>45</sub>H<sub>49</sub>O<sub>4</sub>P (M + Na)<sup>+</sup>: 707.3 Found (M + Na)<sup>+</sup>: 706.7. [α]<sub>D</sub><sup>20</sup> = -80° (*c* = 3.0, CHCl<sub>3</sub>).

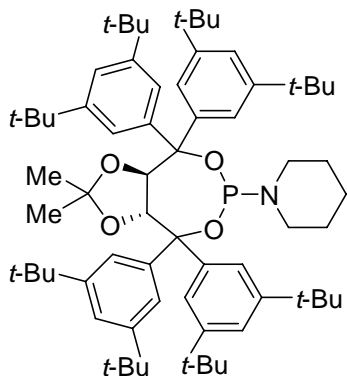

**3,5-(*t*-Bu)<sub>2</sub>TADDOLPNC<sub>5</sub>H<sub>10</sub>.** Prepared according to: Woodward, A. R.; Burks, H. E.; Chan, L. M.; Morken, J. P. *Org. Lett.* **2005**, 7, 5505 in 82% yield. A white solid. mp 192-200 °C (sealed capillary).  $R_f = 0.33$  (SiO<sub>2</sub>, 30:1 hexanes:EtOAc); IR (CH<sub>2</sub>Cl<sub>2</sub> solution): 3075 (w), 2966 (s), 2906 (m), 2865 (m), 1784 (w), 1599 (m), 1450 (m), 1358 (m), 1252 (m), 1201 (m), 1164 (m) cm<sup>-1</sup>; <sup>1</sup>H NMR (CDCl<sub>3</sub>): δ 7.66 (4H, s), 7.44 (2H, br s), 7.27 (1H, s), 7.21-7.25 (3H, m), 7.17 (2H, s), 5.26 (1H, dd,  $J = 6.8$  Hz,  $J = 1.6$  Hz), 4.70 (1H, d,  $J = 6.8$  Hz), 3.32-3.49 (4H, m), 1.60-1.75 (6H, m), 1.46 (3H, s), 1.31 (18H, s), 1.30 (18H, s), 1.28 (18H, s), 1.27 (18H, s), 0.09 (3H, s); <sup>13</sup>C NMR (CDCl<sub>3</sub>): δ 149.5, 149.1, 148.7, 148.6, 146.5, 146.19, 146.17, 142.1, 141.2, 123.7, 122.0, 121.6, 120.5, 120.1, 120.0, 119.8, 109.7, 83.79, 83.62, 82.43, 82.35, 81.06, 45.10 (d,  $^2J_{CP} = 20$  Hz), 35.01, 34.94, 34.83, 31.56,

31.52, 28.02, 27.53 (d,  $^3J_{CP} = 4.7$  Hz), 25.50, 24.04. <sup>31</sup>P NMR (CDCl<sub>3</sub>): δ 137.8. LRMS (ESI+) Calc'd for C<sub>68</sub>H<sub>102</sub>NO<sub>4</sub>P (M)<sup>+</sup>: 1027.8 Found (M)<sup>+</sup>: 1027.8.  $[\alpha]_D^{20} = -40^\circ$  ( $c = 3.0$ , CHCl<sub>3</sub>).

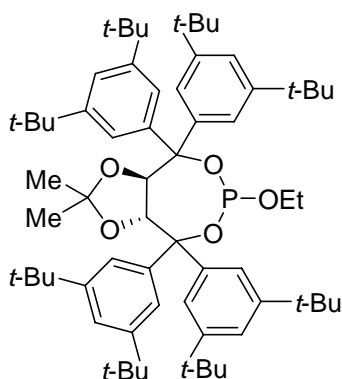

**3,5-(*t*-Bu)<sub>2</sub>TADDOLPOEt.** Prepared according to: Woodward, A. R.; Burks, H. E.; Chan, L. M.; Morken, J. P. *Org. Lett.* **2005**, 7, 5505 with EtOH as the trapping reagent in 75% yield. A white solid. mp 72-100 °C (sealed capillary).  $R_f = 0.36$  (SiO<sub>2</sub>, 30:1 hexanes:EtOAc); IR (CH<sub>2</sub>Cl<sub>2</sub> solution): 3075 (w), 2961 (s), 2902 (m), 2868 (m), 1788 (w), 1599 (m), 1476 (m), 1451 (m), 1392 (m), 1358 (m), 1248 (m), 1202 (m), 1168 (m) cm<sup>-1</sup>; <sup>1</sup>H NMR (CDCl<sub>3</sub>): δ 7.55 (2H, s), 7.49 (2H, s), 7.36 (2H, s), 7.21-7.32 (6H, m), 5.20 (1H, d,  $J = 8.4$  Hz), 5.07 (1H, d,  $J = 8.4$  Hz), 4.30-4.42 (1H, m), 3.97-4.10 (1H, m), 1.18-1.36 (75H, m), 1.09 (3H, s), 0.31 (3H, s); <sup>13</sup>C NMR (CDCl<sub>3</sub>): δ 149.7, 149.2, 148.9, 148.7, 145.7, 141.3, 140.9, 123.6, 123.3, 123.0, 121.6, 121.4, 120.7, 120.3, 120.2, 120.1, 110.9, 84.21, 83.50, 83.27, 83.13, 82.51, 58.59, 34.92, 34.87, 34.83, 31.53, 31.27, 27.18, 25.17, 22.71, 17.10,

14.15. <sup>31</sup>P NMR (CDCl<sub>3</sub>): δ 133.5. LRMS (ESI+) Calc'd for C<sub>65</sub>H<sub>97</sub>O<sub>5</sub>P (M + Na)<sup>+</sup>: 1011.7 Found (M + Na)<sup>+</sup>: 1011.3.  $[\alpha]_D^{20} = -68^\circ$  ( $c = 3.0$ , CHCl<sub>3</sub>).

### Representative procedure for the synthesis of activated enone substrates.

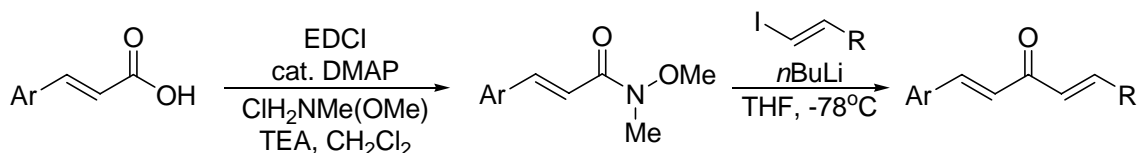

**Amide synthesis:** To 0.405 g (2.22 mmol) of *trans*-3-chlorocinnamic acid and 0.325 g (3.33 mmol) of *N*, *O*-dimethylhydroxylamine hydrochloride in 9 mL of CH<sub>2</sub>Cl<sub>2</sub> was added 0.0542 g (0.444 mmol) of 4-(dimethylamino)pyridine (DMAP) followed by 0.638 g (3.33 mmol) of *N*-(3-dimethylaminopropyl)-*N'*-ethylcarbodiimide hydrochloride (EDCI). This mixture was put under N<sub>2</sub> and 0.44 mL (3.3 mmol) of triethylamine was added dropwise. After addition, the mixture was stirred overnight at ambient temperature. The final mixture was transferred to a separatory funnel, washed with water, then 1 M HCl (2x), and then saturated NaHCO<sub>3</sub>. The organic layer was dried with anhydrous Na<sub>2</sub>SO<sub>4</sub> and concentrated under reduced pressure. Silica gel chromatography (hexanes:EtOAc) afforded 0.435 g (87%) of the Weinreb amide as a white solid. All cinnamic acid derivatives were commercially available except for the acids required to prepare the

benzyl-protected indole substrate, the *p*-trifluoromethylphenyl substituted substrate, and the 5-fluoro-2-methylphenyl substituted substrate. These Weinreb amides were prepared via Horner-Wadsworth-Emmons olefination between diethyl(*N*-methoxy-*N*-methylcarbamoylmethyl)phosphonate and 1-benzyl-1*H*-indole-3-carbaldehyde, *p*-trifluoromethylbenzaldehyde, or 5-fluoro-2-methylbenzaldehyde, respectively (Netz, D. F.; Seidel, J. L. *Tetrahedron Lett.* **1992**, 33, 1957.).

**Vinyl lithium addition:** To 0.426 g (1.90 mmol) of (*E*)-1-iodoheptene in 2 mL of THF at  $-78\text{ }^{\circ}\text{C}$  was added 0.76 mL (1.9 mmol) of a 2.5 M solution of *n*-BuLi in hexane dropwise. This solution was stirred at this temperature for 30 min and then transferred via canula to a solution of 0.215 g (0.951 mmol) of (*E*)-3-(3-chlorophenyl)-*N*-methoxy-*N*-methylacrylamide in 10 mL of THF at  $-78\text{ }^{\circ}\text{C}$ . After complete addition, TLC analysis showed complete consumption of the starting material after 15 min at  $-78\text{ }^{\circ}\text{C}$ , so the reaction was subsequently quenched with satd.  $\text{NH}_4\text{Cl}_{(aq)}$ . The crude reaction was transferred to a separatory funnel with 1 M HCl and  $\text{Et}_2\text{O}$ . The organic layer was collected after shaking, and the aqueous layer was extracted with  $\text{Et}_2\text{O}$  (1x). The combined organics were washed with  $\text{H}_2\text{O}$ , then brine, and finally dried over anhydrous  $\text{Na}_2\text{SO}_4$ , and concentrated using reduced pressure. Silica gel chromatography (hexanes/ $\text{EtOAc}$ ) of the crude mixture afforded 0.203 g (81%) of (1*E*, 4*E*)-1-(3-chlorophenyl)deca-1,4-dien-3-one as a light-yellow solid.

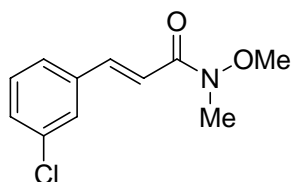

**(*E*)-3-(3-chlorophenyl)-*N*-methoxy-*N*-methylacrylamide.** A white solid. mp 48-52  $^{\circ}\text{C}$ .  $R_f = 0.29$  ( $\text{SiO}_2$ , 2:1 Hexanes: $\text{EtOAc}$ ); IR ( $\text{CH}_2\text{Cl}_2$  solution): 3069 (m), 2974 (m), 2930 (m), 2823 (m), 1659 (s), 1615 (s), 1564 (s), 1469 (s), 1425 (s), 1389 (s), 1199 (s)  $\text{cm}^{-1}$ ;  $^1\text{H NMR}$  ( $\text{CDCl}_3$ ):  $\delta$  7.62 (1H, d,  $J = 16$  Hz), 7.52 (1H, s), 7.34-7.42 (1H, m), 7.22-7.32 (2H, m), 6.99 (1H, d,  $J = 16$  Hz), 3.74 (3H, s), 3.27 (3H, s);  $^{13}\text{C NMR}$  ( $\text{CDCl}_3$ ):  $\delta$  166.3, 141.7, 136.9, 134.6, 129.9, 129.6, 127.4, 126.4, 117.1, 61.91, 32.45. LRMS (ESI+) Calc'd for  $\text{C}_{11}\text{H}_{12}\text{ClNO}_2$  ( $\text{M}$ ) $^+$ : 225.1 Found ( $\text{M}$ ) $^+$ : 225.6.

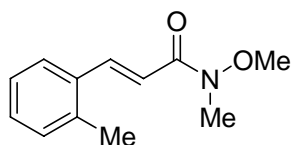

**(*E*)-*N*-methoxy-*N*-methyl-3-*o*-tolylacrylamide.** A colorless oil.  $R_f = 0.35$  ( $\text{SiO}_2$ , 1:1 Hexanes: $\text{EtOAc}$ ); IR (neat): 3062 (w), 2968 (m), 2936 (m), 1659 (s), 1615 (s), 1464 (m), 1413 (m), 1388 (s), 1180 (m)  $\text{cm}^{-1}$ ;  $^1\text{H NMR}$  ( $\text{CDCl}_3$ ):  $\delta$  7.99 (1H, d,  $J = 16$  Hz), 7.57 (1H, d,  $J = 8.0$  Hz), 7.12-7.26 (3H, m), 6.92 (1H, d,  $J = 16$  Hz), 3.72 (3H, s), 3.28 (3H, s), 2.41 (3H, s);  $^{13}\text{C NMR}$  ( $\text{CDCl}_3$ ):  $\delta$  166.8, 141.0, 137.5, 134.0, 130.5, 129.4, 126.1, 126.0, 116.8, 61.75, 32.39, 19.76. LRMS (ESI+) Calc'd for  $\text{C}_{12}\text{H}_{15}\text{NO}_2$  ( $\text{M}$ ) $^+$ : 205.1 Found ( $\text{M}$ ) $^+$ : 205.6.

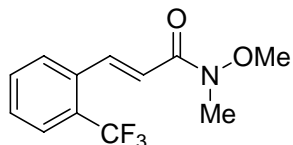

**(*E*)-*N*-methoxy-*N*-methyl-3-(2-(trifluoromethyl)phenyl)acrylamide.** A colorless oil.  $R_f = 0.15$  ( $\text{SiO}_2$ , 3:1 Hexanes: $\text{EtOAc}$ ); IR (neat): 3075 (w), 2974 (m), 2936 (m), 2823 (w), 1841 (w), 1658 (s), 1627 (s), 1488 (s), 1381 (s), 1312 (s), 1287 (s), 1161 (s), 1123 (s)  $\text{cm}^{-1}$ ;  $^1\text{H NMR}$  ( $\text{CDCl}_3$ ):  $\delta$  8.06 (1H, app dq,  $J = 16$  Hz,  $J = 2.4$  Hz), 7.70 (1H, d,  $J = 8.0$  Hz), 7.65 (1H, d,  $J = 8.0$  Hz), 7.53 (1H, t,  $J = 8.0$  Hz), 7.42 (1H, d,  $J = 8.0$  Hz), 6.96 (1H, d,  $J = 16$  Hz), 3.72 (3H, s), 3.28 (3H, s);  $^{13}\text{C NMR}$  ( $\text{CDCl}_3$ ):  $\delta$  165.9, 138.9, 134.3, 131.9, 129.0, 128.7 (q,  $^2J_{\text{CF}} = 30$  Hz), 127.9, 126.0 (q,  $^3J_{\text{CF}} = 5.5$  Hz), 123.9 (q,  $^1J_{\text{CF}} = 272$  Hz), 120.3, 61.88, 32.42. LRMS (APPI) Calc'd for  $\text{C}_{12}\text{H}_{12}\text{F}_3\text{NO}_2$  ( $\text{M} + \text{H}$ ) $^+$ : 260.1 Found ( $\text{M} + \text{H}$ ) $^+$ : 260.1.

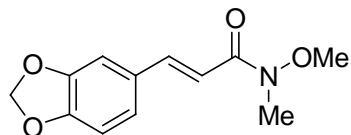

**(E)-3-(benzo[*d*][1,3]dioxol-5-yl)-*N*-methoxy-*N*-methylacrylamide.** A white solid. mp 107-110 °C.  $R_f = 0.21$  (SiO<sub>2</sub>, 1:1 Hexanes:EtOAc); IR (CH<sub>2</sub>Cl<sub>2</sub> solution): 2974 (m), 2936 (m), 2905 (m), 1841 (w), 1652 (s), 1614 (s), 1501 (s), 1444 (s), 1375 (s), 1255 (s), 1180 (m) cm<sup>-1</sup>; <sup>1</sup>H NMR (CDCl<sub>3</sub>): δ 7.59 (1H, d,  $J = 16$  Hz), 7.03 (1H, s), 6.99 (1H, d,  $J = 8.0$  Hz), 6.81 (1H, d,  $J = 16$  Hz), 6.75 (1H, d,  $J = 8$  Hz), 5.94 (2H, s), 3.70 (3H, s), 3.25 (3H, s); <sup>13</sup>C NMR (CDCl<sub>3</sub>): δ 166.9, 149.0, 148.0, 142.9, 129.4, 124.0, 113.6, 108.3, 106.4, 101.3, 61.72, 32.44. LRMS (ESI<sup>+</sup>) Calc'd for C<sub>12</sub>H<sub>13</sub>NO<sub>4</sub> (M)<sup>+</sup>: 235.1 Found (M)<sup>+</sup>: 235.6.

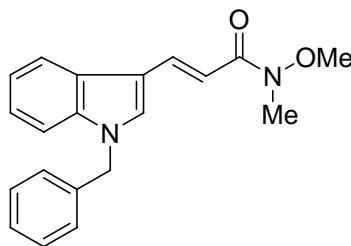

**(E)-3-(1-benzyl-1*H*-indol-3-yl)-*N*-methoxy-*N*-methylacrylamide.** A white solid. mp 42-46 °C.  $R_f = 0.14$  (SiO<sub>2</sub>, 2:1 Hexanes:EtOAc); IR (CH<sub>2</sub>Cl<sub>2</sub> solution): 3106 (m), 3055 (m), 2968 (m), 2936 (m), 1651 (s), 1608 (s), 1526 (m), 1469 (s), 1381 (s), 1167 (m) cm<sup>-1</sup>; <sup>1</sup>H NMR (CDCl<sub>3</sub>): δ 7.96 (1H, d,  $J = 16$  Hz), 7.90-8.0 (1H, m), 7.40 (1H, s), 7.20-7.34 (6H, m), 7.10 (2H, d,  $J = 6.4$  Hz), 7.05 (1H, d,  $J = 16$  Hz), 5.26 (2H, s), 3.79 (3H, s), 3.31 (3H, s); <sup>13</sup>C NMR (CDCl<sub>3</sub>): δ 168.1, 137.4, 136.4, 136.2, 132.1, 128.7, 127.8, 126.7, 126.2, 122.8, 121.1, 120.4, 113.0, 110.7, 110.3, 61.59, 50.20, 32.51. LRMS (APPI) Calc'd for C<sub>20</sub>H<sub>20</sub>N<sub>2</sub>O<sub>2</sub> (M + H)<sup>+</sup>: 321.2 Found (M + H)<sup>+</sup>: 321.2.

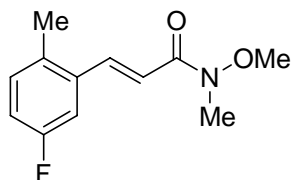

**(E)-3-(5-fluoro-2-methylphenyl)-*N*-methoxy-*N*-methylacrylamide.** The title compound was prepared via Horner-Wadsworth-Emmons olefination with 5-fluoro-2-methylbenzaldehyde in 78% yield. A white solid. mp 68-72 °C.  $R_f = 0.14$  (SiO<sub>2</sub>, 3:1 hexanes:EtOAc); IR (CH<sub>2</sub>Cl<sub>2</sub> solution): 3075 (w), 2973 (m), 2936 (m), 1658 (s), 1620 (s), 1589 (m), 1495 (s), 1412 (m), 1381 (s), 1262 (m), 1179 (m) cm<sup>-1</sup>; <sup>1</sup>H NMR (CDCl<sub>3</sub>): δ 7.88 (1H, dd,  $J = 16$  Hz,  $J = 1.6$  Hz), 7.23 (1H, dd,  $J = 9.6$  Hz,  $J = 2.4$  Hz), 7.10 (1H, dd,  $J = 8.4$  Hz,  $J = 5.6$  Hz), 6.90 (1H, dt,  $J = 8.4$  Hz,  $J = 2.4$  Hz), 6.88 (1H, d,  $J = 16$  Hz), 3.73 (3H, s), 3.27 (3H, s), 2.35 (3H, s); <sup>13</sup>C NMR (CDCl<sub>3</sub>): δ 166.4, 161.1 (d, <sup>1</sup> $J_{CF} = 242$  Hz), 139.9, 135.6 (d, <sup>3</sup> $J_{CF} = 7.0$  Hz), 133.1, 131.9 (d, <sup>3</sup> $J_{CF} = 7.8$  Hz), 117.9, 116.2 (d, <sup>2</sup> $J_{CF} = 20$  Hz), 112.4 (d, <sup>2</sup> $J_{CF} = 22$  Hz), 61.84, 32.41. LRMS (APPI) Calc'd for C<sub>12</sub>H<sub>14</sub>FNO<sub>2</sub> (M + H)<sup>+</sup>: 224.1 Found (M + H)<sup>+</sup>: 224.1.

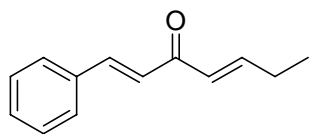

**(1*E*, 4*E*)-1-phenylhepta-1,4-dien-3-one.** Prepared in 90% yield from the Weinreb amide. A yellow oil.  $R_f = 0.29$  (SiO<sub>2</sub>, 10:1 Hexanes:EtOAc); IR (neat): 3031 (w), 2968 (m), 2936 (m), 2879 (w), 1659 (s), 1633 (s), 1602 (s), 1450 (m), 1349 (m), 1199 (m) cm<sup>-1</sup>; <sup>1</sup>H NMR (CDCl<sub>3</sub>): δ 7.63 (1H, d,  $J = 16$  Hz), 7.56 (2H, m), 7.38 (3H, m), 7.05 (1H, dt,  $J = 16$  Hz,  $J = 6.4$  Hz), 6.97 (1H, d,  $J = 16$  Hz), 6.42 (1H, d,  $J = 16$  Hz), 2.30 (2H, p,  $J = 7.2$  Hz), 1.11 (3H, t,  $J = 7.2$  Hz) 1.10-1.40 (5H, m); <sup>13</sup>C NMR (CDCl<sub>3</sub>): δ 189.4, 149.7, 143.0, 134.7, 130.2, 128.8, 128.23, 128.19, 124.6, 25.77, 12.30. LRMS (APPI) Calc'd for C<sub>13</sub>H<sub>14</sub>O (M + H)<sup>+</sup>: 187.1 Found (M + H)<sup>+</sup>: 187.1.

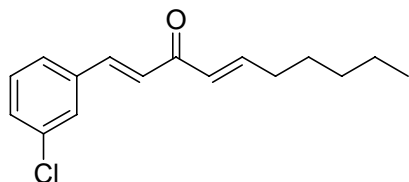

**(1*E*, 4*E*)-1-(3-chlorophenyl)deca-1,4-dien-3-one.** Prepared in 73% yield from the Weinreb amide. An off-white solid. mp 38-40 °C.  $R_f = 0.19$  (SiO<sub>2</sub>, 15:1 Hexanes:EtOAc); IR (CH<sub>2</sub>Cl<sub>2</sub> solution): 3031, (w), 2955 (s), 2924 (s),

2854 (s), 2817 (w), 1948 (w), 1665 (s), 1602 (s), 1463 (m), 1419 (m), 1293 (m), 1199 (m)  $\text{cm}^{-1}$ ;  $^1\text{H}$  NMR ( $\text{CDCl}_3$ ):  $\delta$  7.52 (1H, d,  $J = 16$  Hz), 7.52 (1H, m), 7.39 (1H, dt,  $J = 6.8$  Hz,  $J = 2.0$  Hz), 7.25-7.34 (2H, m), 6.99 (1H, dd,  $J = 16$  Hz,  $J = 7.2$  Hz), 6.94 (1H, d,  $J = 16$  Hz), 6.74 (1H, dt,  $J = 16$  Hz,  $J = 1.6$  Hz), 2.25 (2H, q,  $J = 7.2$  Hz), 1.48 (2H, p,  $J = 7.2$  Hz), 1.24-1.38 (4H, m) 0.871 (3H, t,  $J = 7.2$  Hz);  $^{13}\text{C}$  NMR ( $\text{CDCl}_3$ ):  $\delta$  188.7, 148.8, 141.0, 136.6, 134.8, 130.03, 130.00, 129.3, 127.7, 126.5, 125.7, 32.700, 31.38, 27.81, 22.44, 13.96. LRMS (APPI) Calc'd for  $\text{C}_{16}\text{H}_{19}\text{ClO}$  ( $\text{M} + \text{H}$ ) $^+$ : 263.1 Found ( $\text{M} + \text{H}$ ) $^+$ : 263.1.

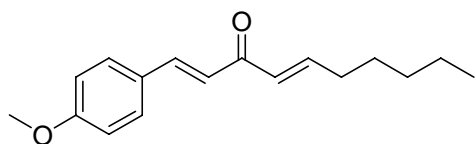

**(1E, 4E)-1-(4-methoxyphenyl)deca-1,4-dien-3-one.** Prepared in 90% yield from the Weinreb amide. A yellow oil.  $R_f = 0.11$  ( $\text{SiO}_2$ , 10:1 Hexanes:EtOAc); IR (neat): 3006 (w), 2955 (m), 2930 (m), 2861 (m), 1659 (s), 1627 (s), 1590 (s), 1508 (s), 1420 (m), 1306 (m), 1256 (s), 1168 (s)  $\text{cm}^{-1}$ ;  $^1\text{H}$  NMR ( $\text{CDCl}_3$ ):  $\delta$  7.56 (1H, d,  $J = 16$  Hz), 7.46 (2H, d,  $J = 8.8$  Hz), 6.93 (1H, dt,  $J = 16$  Hz,  $J = 7.2$  Hz), 6.84 (2H, d,  $J = 8.8$  Hz), 6.80 (1H, d,  $J = 16$  Hz), 6.36 (1H, d,  $J = 16$  Hz), 3.76 (3H, s), 2.20 (2H, q,  $J = 7.2$  Hz), 1.44 (2H, p,  $J = 7.2$  Hz), 1.20-1.36 (4H, m), 0.847 (3H, t,  $J = 6.8$  Hz);  $^{13}\text{C}$  NMR ( $\text{CDCl}_3$ ):  $\delta$  188.9, 161.3, 147.6, 142.5, 129.8, 129.1, 127.3, 122.5, 114.2, 55.17, 32.52, 31.27, 27.78, 22.34, 13.87. LRMS (APPI) Calc'd for  $\text{C}_{17}\text{H}_{22}\text{O}_2$  ( $\text{M} + \text{H}$ ) $^+$ : 259.2 Found ( $\text{M} + \text{H}$ ) $^+$ : 259.2.

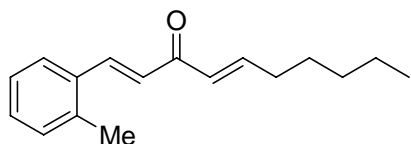

**(1E, 4E)-1-o-tolyldeca-1,4-dien-3-one.** Prepared in 89% yield from the Weinreb amide. A yellow oil.  $R_f = 0.25$  ( $\text{SiO}_2$ , 15:1 Hexanes:EtOAc); IR (neat): 3025 (w), 2955 (s), 2930 (s), 2854 (m), 1658 (s), 1627 (s), 1596 (s), 1457 (m), 1319 (m), 1099 (m)  $\text{cm}^{-1}$ ;  $^1\text{H}$  NMR ( $\text{CDCl}_3$ ):  $\delta$  7.92 (1H, d,  $J = 16$  Hz), 7.58 (1H, d,  $J = 7.6$  Hz), 7.10-7.30 (3H, m), 6.99 (1H, dt,  $J = 16$  Hz,  $J = 7.2$  Hz), 6.89 (1H, d,  $J = 16$  Hz), 6.39 (1H, dt,  $J = 16$  Hz,  $J = 1.6$  Hz), 2.41 (3H, s), 2.25 (2H, q, 7.2 Hz), 1.48 (2H, p,  $J = 7.6$  Hz), 1.20-1.40 (4H, m), 0.88 (3H, t,  $J = 6.8$  Hz);  $^{13}\text{C}$  NMR ( $\text{CDCl}_3$ ):  $\delta$  189.0, 148.2, 140.3, 137.9, 133.6, 130.6, 129.9, 129.5, 126.1, 125.5, 32.61, 31.31, 27.78, 22.38, 19.71, 13.90. LRMS (ESI+) Calc'd for  $\text{C}_{17}\text{H}_{22}\text{O}$  ( $\text{M}$ ) $^+$ : 242.2 Found ( $\text{M}$ ) $^+$ : 242.7.

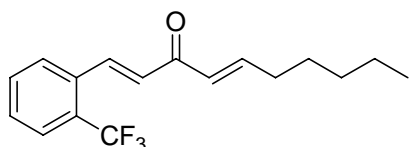

**(1E, 4E)-1-(2-(trifluoromethyl)phenyl)deca-1,4-dien-3-one.** Prepared in 79% yield from the Weinreb amide. A yellow oil.  $R_f = 0.22$  ( $\text{SiO}_2$ , 16:1 Hexanes:EtOAc); IR (neat): 2955 (s), 2930 (s), 2867 (m), 1659 (s), 1633 (s), 1602 (s), 1489 (m), 1313 (s), 1162 (s), 1124 (s)  $\text{cm}^{-1}$ ;  $^1\text{H}$  NMR ( $\text{CDCl}_3$ ):  $\delta$  7.93 (1H, d,  $J = 16$  Hz), 7.71 (1H, d,  $J = 8.0$  Hz), 7.65 (1H, d,  $J = 8.0$  Hz), 7.53 (1H, t,  $J = 8.0$  Hz), 7.43 (1H, t,  $J = 8.0$  Hz), 6.98 (1H, dt,  $J = 16$  Hz,  $J = 7.2$  Hz), 6.86 (1H, d,  $J = 16$  Hz), 6.39 (1H, dt,  $J = 16$  Hz,  $J = 1.6$  Hz), 2.24 (2H, q,  $J = 6.8$  Hz), 1.47 (2H, p,  $J = 7.2$  Hz), 1.22-1.36 (4H, m) 0.86 (3H, t,  $J = 6.8$  Hz);  $^{13}\text{C}$  NMR ( $\text{CDCl}_3$ ):  $\delta$  188.9, 149.2, 138.1, 133.8, 132.0, 129.4, 128.9, 128.85 (q,  $^2J_{\text{CF}} = 30$  Hz), 128.6, 127.7, 126.0 (q,  $^3J_{\text{CF}} = 5.4$  Hz), 123.9 (q,  $^1J_{\text{CF}} = 272$  Hz), 32.68, 31.31, 27.76, 22.39, 13.88. LRMS (ESI+) Calc'd for  $\text{C}_{17}\text{H}_{19}\text{F}_3\text{O}$  ( $\text{M}$ ) $^+$ : 296.1 Found ( $\text{M}$ ) $^+$ : 296.7.

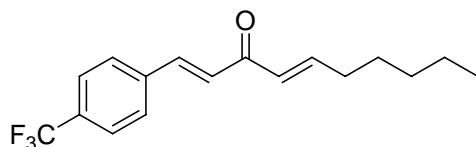

**(1E, 4E)-1-(4-trifluoromethyl)phenyl)deca-1,4-dien-3-one.** Prepared in 66% yield from the Weinreb amide. A yellow oil.  $R_f = 0.23$  ( $\text{SiO}_2$ , 16:1 Hexanes:EtOAc); IR (neat): 3043 (w), 2961 (s), 2930 (s), 2861 (m), 1923 (w), 1665 (s), 1633 (s), 1469 (m), 1419 (m), 1319 (s), 1167

(s), 1135 (s)  $\text{cm}^{-1}$ ;  $^1\text{H}$  NMR ( $\text{CDCl}_3$ ):  $\delta$  7.65 (1H, d,  $J = 8.7$  Hz), 7.63 (1H, d,  $J = 8.7$  Hz), 7.62 (1H, d,  $J = 16$  Hz), 7.02 (1H, d,  $J = 16$  Hz), 7.02 (1H, dt,  $J = 16$  Hz,  $J = 6.6$  Hz), 6.41 (1H, d,  $J = 16$  Hz), 2.28 (2H, q,  $J = 6.6$  Hz), 1.50 (2H, p,  $J = 7.5$  Hz), 1.24-1.40 (4H, m), 0.89 (3H, t,  $J = 6.6$  Hz);  $^{13}\text{C}$  NMR ( $\text{CDCl}_3$ ):  $\delta$  188.7, 149.2, 140.8, 138.2, 131.6 (q,  $^2J_{\text{CF}} = 32$  Hz), 129.2, 128.3, 126.8, 125.8 (q,  $^3J_{\text{CF}} = 3.1$  Hz), 123.8 (q,  $^1J_{\text{CF}} = 270$  Hz), 32.76, 31.42, 27.85, 22.48, 13.93. LRMS (ESI+) Calc'd for  $\text{C}_{17}\text{H}_{19}\text{F}_3\text{O}$  (M) $^+$ : 296.1 Found (M) $^+$ : 296.7.

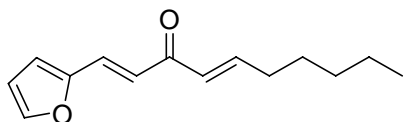

**(1E, 4E)-1-(furan-2-yl)deca-1,4-dien-3-one.** Prepared in 86% yield from the Weinreb amide. A yellow oil.  $R_f = 0.15$  ( $\text{SiO}_2$ , 15:1 Hexanes:EtOAc); IR (neat): 3124 (w), 3037 (w), 2955 (s), 2930 (s), 2861 (m), 1658 (s), 1633 (s), 1595 (s), 1482 (m), 1306 (m), 1217 (m), 1098 (m)  $\text{cm}^{-1}$ ;  $^1\text{H}$  NMR ( $\text{CDCl}_3$ ):  $\delta$  7.44 (1H, s), 7.36 (1H, d,  $J = 16$  Hz), 6.93 (1H, dt,  $J = 16$  Hz,  $J = 6.8$  Hz), 6.85 (1H, d,  $J = 16$  Hz), 6.60 (1H, d,  $J = 3.2$  Hz), 6.42 (1H, m), 6.29 (1H, d,  $J = 16$  Hz), 2.20 (2H, q,  $J = 6.8$  Hz), 1.44 (2H, p,  $J = 6.8$  Hz), 1.17-1.36 (4H, m), 0.85 (3H, t,  $J = 6.8$  Hz);  $^{13}\text{C}$  NMR ( $\text{CDCl}_3$ ):  $\delta$  188.6, 151.4, 148.0, 144.6, 129.7, 128.9, 121.8, 115.4, 112.4, 32.60, 31.31, 27.79, 22.39, 13.90. LRMS (APPI) Calc'd for  $\text{C}_{14}\text{H}_{18}\text{O}_2$  (M + H) $^+$ : 219.1 Found (M + H) $^+$ : 219.1.

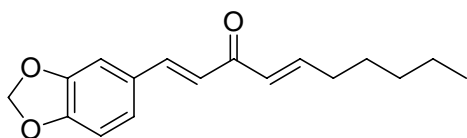

**(1E, 4E)-1-(benzo[d][1,3]dioxol-5-yl)deca-1,4-dien-3-one.** Prepared in 87% yield from the Weinreb amide. An off-white solid. mp = 40-44  $^{\circ}\text{C}$ .  $R_f = 0.23$  ( $\text{SiO}_2$ , 9:1 Hexanes:EtOAc); IR ( $\text{CH}_2\text{Cl}_2$  solution): 2961 (s), 2930 (s), 2861 (s), 1658 (s), 1626 (s), 1589 (s), 1488 (s), 1444 (s), 1362 (m), 1255 (s), 1205 (m), 1098 (m)  $\text{cm}^{-1}$ ;  $^1\text{H}$  NMR ( $\text{CDCl}_3$ ):  $\delta$  7.51 (1H, d,  $J = 16$  Hz), 7.04 (1H, s), 7.01 (1H, d,  $J = 8.4$  Hz), 6.94 (1H, dt,  $J = 16$  Hz,  $J = 7.2$  Hz), 6.77 (1H, d,  $J = 16$  Hz), 6.77 (1H, d,  $J = 8.4$  Hz), 6.36 (1H, dt,  $J = 16$  Hz,  $J = 1.6$  Hz), 5.96 (2H, s), 2.22 (2H, q,  $J = 7.2$  Hz), 1.46 (2H, p,  $J = 7.2$  Hz), 1.20-1.37 (4H, m), 0.86 (3H, t,  $J = 6.4$  Hz);  $^{13}\text{C}$  NMR ( $\text{CDCl}_3$ ):  $\delta$  188.9, 149.6, 148.2, 147.9, 142.6, 129.25, 129.16, 124.8, 122.8, 108.5, 106.4, 101.5, 32.61, 31.35, 27.84, 22.41, 13.94. LRMS (APPI) Calc'd for  $\text{C}_{17}\text{H}_{20}\text{O}_3$  (M + H) $^+$ : 273.1 Found (M + H) $^+$ : 273.1.

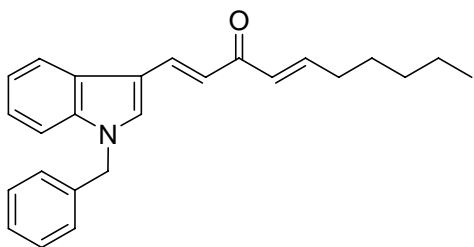

**(1E, 4E)-1-(1-benzyl-1H-indol-3-yl)deca-1,4-dien-3-one.** Prepared in 88% yield from the Weinreb amide. A yellow solid. mp 84-88  $^{\circ}\text{C}$ .  $R_f = 0.21$  ( $\text{SiO}_2$ , 5:1 Hexanes:EtOAc); IR ( $\text{CH}_2\text{Cl}_2$  solution): 3106 (m), 3037 (w), 2961 (m), 2930 (m), 2854 (m), 1658 (m), 1627 (s), 1576 (s), 1526 (s), 1463 (m), 1387 (s), 1350 (m), 1281 (m), 1173 (m)  $\text{cm}^{-1}$ ;  $^1\text{H}$  NMR ( $\text{CDCl}_3$ ):  $\delta$  7.94-8.00 (1H, m), 7.91 (1H, d,  $J = 16$  Hz), 7.44 (1H, s), 7.16-7.26 (6H, m), 7.13 (2H, dd,  $J = 7.6$  Hz,  $J = 2$  Hz), 6.99 (1H, dt,  $J = 16$  Hz,  $J = 8.0$  Hz), 6.99 (1H, d,  $J = 16$  Hz), 6.44 (1H, dt,  $J = 16$  Hz,  $J = 1.6$  Hz), 5.30 (2H, s), 2.26 (2H, q,  $J = 8.0$  Hz), 1.51 (2H, p,  $J = 7.2$  Hz), 1.23-1.41 (4H, m), 0.90 (3H, t,  $J = 7.2$  Hz);  $^{13}\text{C}$  NMR ( $\text{CDCl}_3$ ):  $\delta$  189.2, 146.7, 137.7, 136.5, 136.0, 133.1, 133.0, 129.5, 128.9, 128.0, 126.9, 126.3, 123.1, 121.5, 120.7, 113.2, 110.5, 50.46, 32.65, 31.44, 27.98, 22.49, 14.01. LRMS (APPI) Calc'd for  $\text{C}_{25}\text{H}_{27}\text{NO}$  (M + H) $^+$ : 358.2 Found (M + H) $^+$ : 358.2.



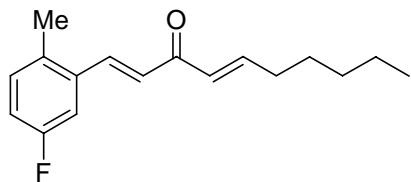

**(1E, 4E)-1-(5-fluoro-2-methylphenyl)deca-1,4-dien-3-one.** Prepared in 82% yield from the Weinreb amide. A yellow oil.  $R_f = 0.11$  (SiO<sub>2</sub>, 20:1 hexanes:EtOAc); IR (neat): 2955 (m), 2930 (s), 2861 (m), 1659 (s), 1627 (s), 1489 (s), 1338 (m), 1237 (m) cm<sup>-1</sup>; <sup>1</sup>H NMR (CDCl<sub>3</sub>):  $\delta$  7.83 (1H, dd,  $J = 16$  Hz,  $J = 1.6$  Hz), 7.26 (1H, dd,  $J = 9.6$  Hz,  $J = 2.4$  Hz), 7.12 (1H, dd,  $J = 8.4$  Hz,  $J = 5.6$  Hz), 6.99 (1H, dt,  $J = 16$  Hz,  $J = 6.8$  Hz), 6.95 (1H, dt,  $J = 8.4$  Hz,  $J = 2.4$  Hz), 6.86 (1H, d,  $J = 16$  Hz), 6.36 (1H, dt,  $J = 16$  Hz,  $J = 1.6$  Hz), 2.37 (3H, s), 2.26 (2H, q,  $J = 6.8$  Hz), 1.49 (2H, p,  $J = 7.2$  Hz), 1.21-1.37 (4H, m), 0.88 (3H, t,  $J = 6.8$  Hz); <sup>13</sup>C NMR (CDCl<sub>3</sub>):  $\delta$  188.8, 161.2 (d, <sup>1</sup> $J_{CF} = 242$  Hz), 148.8, 139.2, 135.4 (d, <sup>3</sup> $J_{CF} = 7.8$  Hz), 133.6, 132.0 (d, <sup>3</sup> $J_{CF} = 7.8$  Hz), 129.6, 126.3, 116.7 (d, <sup>2</sup> $J_{CF} = 21$  Hz), 112.4 (d, <sup>2</sup> $J_{CF} = 22$  Hz), 32.72, 31.38, 27.83, 22.45, 19.03, 13.96; <sup>19</sup>F NMR (CDCl<sub>3</sub>):  $\delta$  93.28 (m). LRMS (APPI) Calc'd for C<sub>17</sub>H<sub>21</sub>FO (M + H)<sup>+</sup>: 261.2 Found (M + H)<sup>+</sup>: 261.2.

### Representative procedure for the conjugate allylation catalyst survey (Table 1):

An oven-dried 2-dram vial equipped with a magnetic stir-bar was charged with 3.0 mg (0.011 mmol) of bis(1,5-cyclooctadiene)nickel, 11.8 mg (0.0218 mmol) of chiral ligand **6**, and 0.73 mL of THF in a dry-box under an argon atmosphere. The vial was capped and stirred for 45 min. Next, 22.0 mg (0.263 mmol) of allylboronic acid pinacol ester was added, followed by 25.0 mg (0.109 mmol) of (1E, 4E)-1-phenyldeca-1,4-dien-3-one. The vial was capped, taped with electrical tape, removed from the dry-box, and allowed to stir at ambient temperature for 8 h. After this time period, degassed water (N<sub>2</sub> sparge) was added and the mixture transferred to a separatory funnel with CH<sub>2</sub>Cl<sub>2</sub>. After swirling the layers, the organic layer was collected and the aqueous layer washed with CH<sub>2</sub>Cl<sub>2</sub> (2x). The combined organic layers were dried with anhydrous Na<sub>2</sub>SO<sub>4</sub>, and volatiles were removed under reduced pressure. Analysis of the crude reaction mixture using <sup>1</sup>H NMR was used to determine the chemoselectivity of the reaction. Silica gel chromatography (hexanes/EtOAc) afforded 10.6 mg (36%) of the conjugate allylation product as a mixture of isomers.

Notes: Entry 1 was performed according to: Sieber, J. D.; Liu, S.; Morken, J. P. *J. Am. Chem. Soc.* **2007**, *129*, 2214. Entry 2 uses 2.5 mol% Pd<sub>2</sub>(dba)<sub>3</sub> and 6 mol% ligand and went for 24 h reaction time.

### Representative procedure for the asymmetric conjugate allylation (Tables 2, 3, 5):

An oven-dried 2-dram vial equipped with a magnetic stir-bar was charged with 3.0 mg (0.011 mmol) of bis(1,5-cyclooctadiene)nickel, 22.4 mg (0.0219 mmol) of chiral ligand **14**, and 0.44 mL of toluene in a dry-box under an argon atmosphere. The vial was capped and stirred for 45 min. Next, 44.2 mg (0.263 mmol) of allylboronic acid pinacol ester was added followed by 50.0 mg (0.219 mmol) of (1E, 4E)-1-phenyldeca-1,4-dien-3-one. The vial was capped, taped with electrical tape, removed from the dry-box, and allowed to stir at ambient temperature. After this time period, degassed water (N<sub>2</sub> sparge) was added and the mixture transferred to a separatory funnel with CH<sub>2</sub>Cl<sub>2</sub>. After swirling the layers, the organic layer was collected and the aqueous layer washed with CH<sub>2</sub>Cl<sub>2</sub> (2x). The combined organic layers were dried with anhydrous Na<sub>2</sub>SO<sub>4</sub>, and volatiles were removed under reduced pressure. Analysis of the crude reaction mixture using either <sup>1</sup>H NMR or GLC analysis was used to determine the chemoselectivity of the reaction. Silica gel chromatography (hexanes/EtOAc) afforded 43.7 mg (74%) of the conjugate allylation product.

**Procedure for conjugate allylation with unactivated substrates (Scheme 3):**

The conjugate allylation performed on benzylidene acetone, depicted in Scheme 3, was carried out using the same procedure as described for the asymmetric conjugate allylation in Table 2.

**Conjugate allylation described in Table 4:**

The conjugate allylation was performed as previously described (Sieber, J. D.; Liu, S.; Morken, J. P. *J. Am. Chem. Soc.* **2007**, *129*, 2214). Note that for entry 4, the metal, ligand, and substrate were weighed into the vial, followed by dilution with THF, and lastly addition of allylboronic acid. Mixing Ni(cod)<sub>2</sub> and P(O-*o*-<sup>t</sup>Bu)<sub>3</sub> in THF under the previously described conditions led to a black solution which did not effect the conjugate allylation.

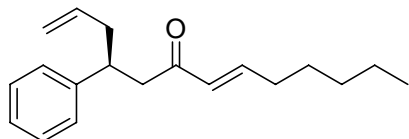

**(S,E)-4-phenyltrideca-1,7-dien-6-one.** An oil.  $R_f = 0.19$  (SiO<sub>2</sub>, 40:1 Hexanes:EtOAc); IR (neat): 3030 (m), 2926 (s), 1697 (s), 1667 (s), 1452 (m) cm<sup>-1</sup>; <sup>1</sup>H NMR (CDCl<sub>3</sub>):  $\delta$  7.14-7.24 (2H, m), 7.04-7.14 (3H, m), 6.65 (1H, dt,  $J = 16$  Hz,  $J = 7.2$  Hz), 5.92 (1H, d,  $J = 16$  Hz), 5.56 (1H, ddt,  $J = 17$  Hz,  $J = 10$  Hz,  $J = 7.2$  Hz), 4.82-4.94 (2H, m) 3.22 (1H, p,  $J = 7.2$  Hz), 2.76 (1H, app dd,  $J = 16$  Hz,  $J = 6.6$  Hz), 2.75 (1H, app dd,  $J = 16$  Hz,  $J = 7.6$  Hz), 2.30 (2H, t,  $J = 7.2$  Hz), 2.06 (2H, q,  $J = 6.8$  Hz), 1.32 (2H, p,  $J = 7.2$  Hz), 1.10-1.28 (4H, m), 0.796 (3H, t,  $J = 7.2$  Hz); <sup>13</sup>C NMR (CDCl<sub>3</sub>):  $\delta$  199.1, 147.6, 144.2, 136.2, 130.5, 128.3, 127.5, 126.2, 116.6, 46.04, 40.99, 40.62, 32.39, 31.31, 27.74, 22.42, 13.97. LRMS (ESI+) Calc'd for C<sub>19</sub>H<sub>26</sub>O (M)<sup>+</sup>: 270.2 Found (M)<sup>+</sup>: 270.7.  $[\alpha]_D^{20} = +5.9^\circ$  ( $c = 1.0$ , CHCl<sub>3</sub>).

**Proof of stereochemistry.** Chemoselectivity was determined using achiral GLC. Enantioselectivities were determined by comparison with authentic racemic material prepared using either triphenylphosphine or triphenylphosphite as the achiral ligand in the conjugate allylation reaction. Absolute stereochemistry was determined by subjecting the conjugate allylation product to ring closing metathesis conditions using the Hoveyda-Grubbs second generation catalyst in CH<sub>2</sub>Cl<sub>2</sub> to afford 5-phenyl-2-cyclohexen-1-one (Sieber, J. D.; Liu, S.; Morken, J. P. *J. Am. Chem. Soc.* **2007**, *129*, 2214.). The optical rotation was measured ( $[\alpha]_D^{20} = +40^\circ$  ( $c = 0.5$ , CHCl<sub>3</sub>)) and compared to the known literature value (Hareau, G. P.-J.; Koiwa, M.; Hikichi, S; Sato, F. *J. Am. Chem. Soc.* **1999**, *121*, 3640).

*Achiral GLC (Ultra 1, Hewlett-Packard, 140 °C) analysis of the crude reaction mixture:*

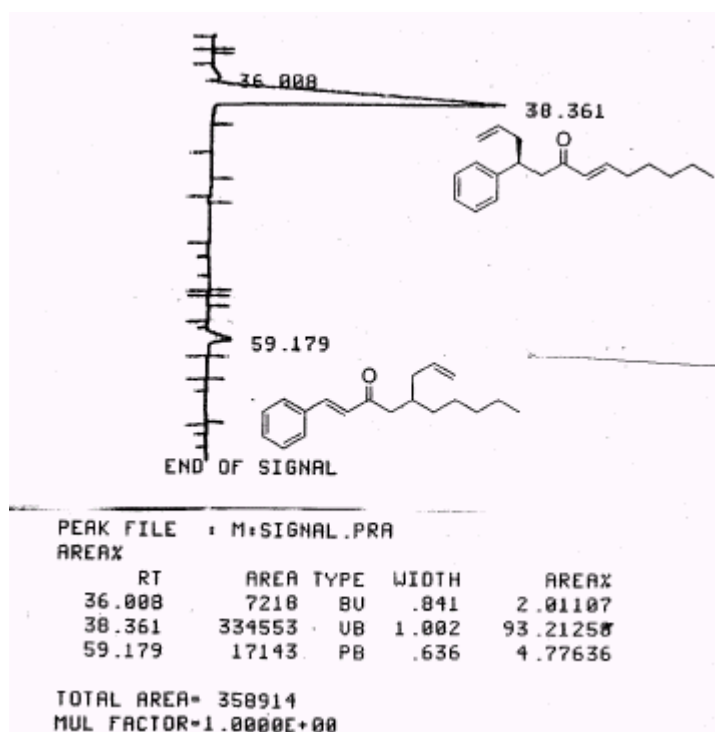

Chiral SFC (AD-H, Chiralpak, 150 bar, 50°C, flow = 1.0 mL/min, 2.0 % MeOH) analysis of conjugate allylation product:

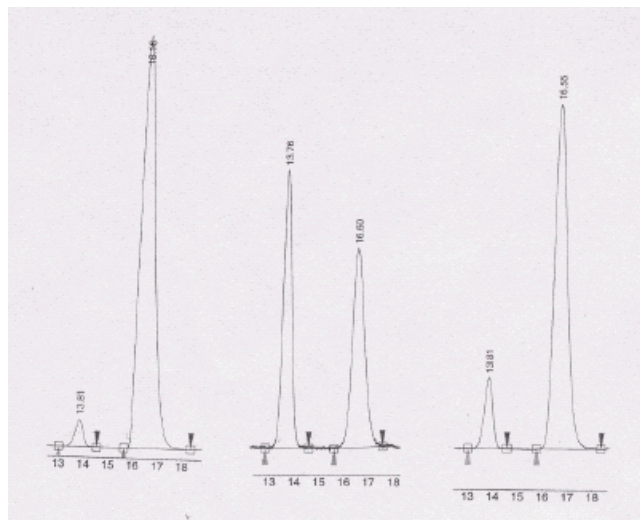

| Index | Name    | Start Time [Min] | Time [Min] | End Time [Min] | RT Offset [Min] | Quantity [% Area] | Height [µV] | Area [µV.Min] | Area [%] |
|-------|---------|------------------|------------|----------------|-----------------|-------------------|-------------|---------------|----------|
| 1     | UNKNOWN | 13.00            | 13.81      | 14.54          | 0.00            | 3.88              | 1709.2      | 651.2         | 3.503    |
| 2     | UNKNOWN | 15.54            | 16.16      | 18.34          | 0.00            | 95.42             | 28593.3     | 17521.8       | 96.417   |
| Total |         |                  |            |                |                 | 100.00            | 28385.5     | 18173.0       | 100.000  |

Allylation product

Racemic

Allylation product + racemic coinjection

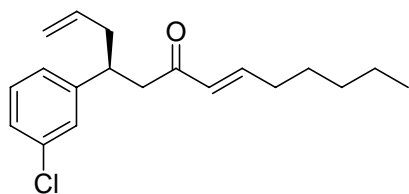

**(*S,E*)-4-(3-chlorophenyl)trideca-1,7-dien-6-one.** An oil.  $R_f(\text{major}) = 0.18$  ( $\text{SiO}_2$ , 40:1 Hexanes:EtOAc),  $R_f(\text{minor}) = 0.24$  ( $\text{SiO}_2$ , 40:1 Hexanes:EtOAc); IR (neat): 2957 (s), 2923 (s), 2853 (m), 1673 (s), 1624 (s), 1434 (m), 1367 (m)  $\text{cm}^{-1}$ ;  $^1\text{H NMR}$  ( $\text{CDCl}_3$ ):  $\delta$  7.00-7.20 (4H, m), 6.74 (1H, dt,  $J = 16$  Hz,  $J = 6.8$  Hz), 5.99 (1H, d,  $J = 16$  Hz), 5.54 (1H, ddt,  $J = 17$  Hz,  $J = 10$  Hz,  $J = 7.2$  Hz), 4.87-5.03 (2H, m), 3.28 (1H, p,  $J = 7.2$  Hz) 2.82 (1H, dd,  $J = 16$  Hz,  $J = 6.0$  Hz), 2.80 (1H, dd,  $J = 16$  Hz,  $J = 7.6$  Hz), 2.34 (2H, m), 2.14 (2H, q,  $J = 7.2$  Hz), 1.40 (2H, p,  $J = 7.2$  Hz), 1.15-1.35 (4H, m), 0.86 (3H, t,  $J = 7.2$  Hz);  $^{13}\text{C NMR}$  ( $\text{CDCl}_3$ ):  $\delta$  198.5, 147.9, 146.4, 135.7, 134.1, 130.4, 129.6, 127.5, 126.5, 125.9, 117.0, 45.65, 40.62, 40.48, 32.43, 31.33, 27.74, 22.43, 13.97. LRMS (ESI+) Calc'd for  $\text{C}_{19}\text{H}_{25}\text{ClO}$  ( $\text{M}^+$ ): 304.2 Found ( $\text{M}^+$ ): 304.7.  $[\alpha]_{\text{D}}^{20} = +4.4^\circ$  ( $c = 2.5$ ,  $\text{CHCl}_3$ ).

**Proof of stereochemistry.** Chemoselectivity was determined using achiral GLC (Note: the starting material had the same retention time as the major isomer. The reported ratios are calculated assuming 95% conversion as evident by the appearance of no starting material in the crude  $^1\text{H NMR}$  spectrum.). Enantioselectivities were determined by comparison with authentic racemic material prepared using either triphenylphosphine or triphenylphosphite as the achiral ligand in the conjugate allylation reaction. Absolute stereochemistry was determined by subjecting the conjugate allylation product to ring closing metathesis conditions using the Hoveyda-Grubbs second generation catalyst, in  $\text{CH}_2\text{Cl}_2$ , to afford 5-(*m*-chlorophenyl)-2-cyclohexen-1-one (Sieber, J. D.; Liu, S.; Morken, J. P. *J. Am. Chem. Soc.* **2007**, *129*, 2214.). The optical rotation was measured ( $[\alpha]_{\text{D}}^{20} = +32^\circ$  ( $c = 1.0$ ,  $\text{CHCl}_3$ )) and compared to the known literature value (Chen, Q.; Kuriyama, M.; Soeta, T.; Hao, X.; Yamada, K. -I.; Tomioka, K. *Org. Lett.* **2005**, *7*, 4439).

Achiral GLC (Ultra 1, Hewlett-Packard,  $180^\circ\text{C}$ ) analysis of the crude reaction mixture:

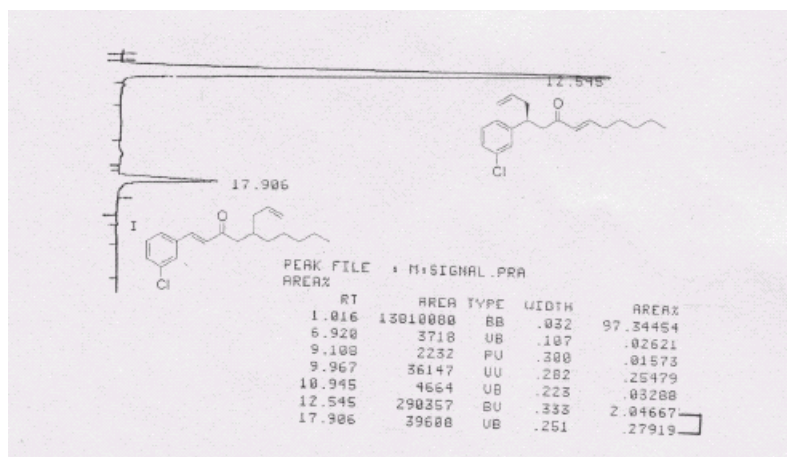

Chiral SFC (AD-H, Chiralpak, 150 bar, 50°C, flow = 2.0 mL/min, 3.0 % MeOH) analysis of conjugate allylation product:

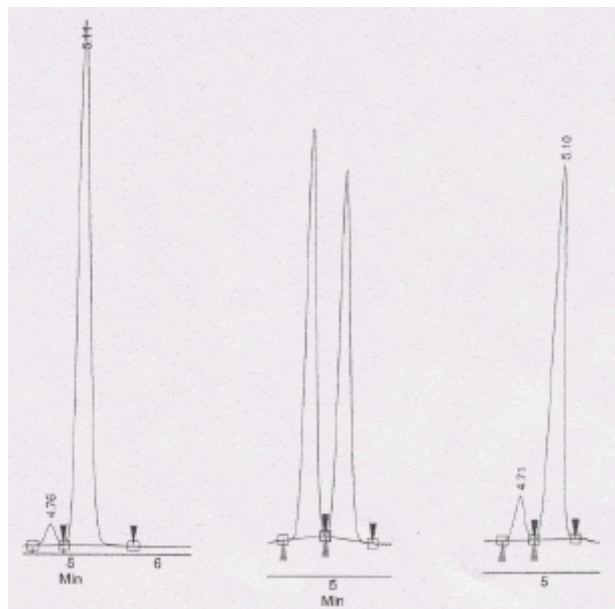

| Index | Name    | Start [Min] | Time [Min] | End [Min] | RT Offset [Min] | Quantity [% Area] | Height [µV] | Area [µV Min] | Area [%] |
|-------|---------|-------------|------------|-----------|-----------------|-------------------|-------------|---------------|----------|
| 1     | UNKNOWN | 4.55        | 4.76       | 4.91      | 0.00            | 3.26              | 1741.6      | 227.2         | 3.265    |
| 2     | UNKNOWN | 4.91        | 5.11       | 5.72      | 0.00            | 96.74             | 42475.9     | 6732.2        | 96.735   |
| Total |         |             |            |           |                 | 100.00            | 44217.5     | 6959.4        | 100.000  |

Allylation product

Racemic

Allylation product + racemic coinjection

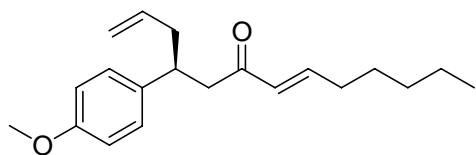

**(S,E)-4-(4-methoxyphenyl)trideca-1,7-dien-6-one.** An oil.  $R_f = 0.18$  ( $\text{SiO}_2$ , 17:1 pentane: $\text{Et}_2\text{O}$ ); IR (neat): 3074 (w), 2962 (s), 2924 (s), 2861 (s), 2055 (w), 1879 (w), 1671 (s), 1620 (s), 1514 (s), 1464 (m), 1243 (s), 1180 (s)  $\text{cm}^{-1}$ ;  $^1\text{H}$  NMR ( $\text{CDCl}_3$ ):  $\delta$  7.08 (2H, d,  $J = 8$  Hz), 6.79 (2H, d,  $J = 8$  Hz), 6.72 (1H, dt,  $J = 16$  Hz,  $J = 7.2$  Hz), 5.98 (1H, d,  $J = 16$  Hz), 5.63 (1H, ddt,  $J = 17$  Hz,  $J = 10$  Hz,  $J = 6.8$  Hz), 4.90-5.02 (2H, m), 3.75 (3H, s), 3.24 (1H, p,  $J = 7.6$  Hz), 2.78 (2H, m), 2.34 (2H, t,  $J = 6.8$  Hz), 2.13 (2H, q,  $J = 7.2$  Hz), 1.39 (2H, p,  $J = 7.2$  Hz), 1.18-1.34 (4 H, m), 0.863 (3H, t,  $J = 7.2$  Hz);  $^{13}\text{C}$  NMR ( $\text{CDCl}_3$ ):  $\delta$  199.3, 157.9, 147.5, 136.3, 136.2, 130.5, 128.3, 116.5, 113.7, 55.16, 46.33, 40.80, 40.28, 32.40, 31.33, 27.75, 22.42, 13.99. LRMS (ESI+) Calc'd for  $\text{C}_{20}\text{H}_{28}\text{O}_2$  ( $\text{M}^+$ ): 300.2 Found ( $\text{M}^+$ ): 300.8.  $[\alpha]_{\text{D}}^{20} = +9.5^\circ$  ( $c = 3.0$ ,  $\text{CHCl}_3$ ).

**Proof of stereochemistry.** Chemoselectivity was determined using achiral GLC. Enantioselectivities were determined by comparison with authentic racemic material prepared using either triphenylphosphine or triphenylphosphite as the achiral ligand in the conjugate allylation reaction. Absolute stereochemistry was determined by subjecting the conjugate allylation product to ring closing metathesis conditions using the Hoveyda-Grubbs second generation catalyst, in  $\text{CH}_2\text{Cl}_2$ , to afford 5-(*p*-methoxyphenyl)-2-cyclohexen-1-one (Sieber, J. D.; Liu, S.; Morken, J. P. *J. Am. Chem. Soc.* **2007**, *129*, 2214.). Subsequent 1,4 reduction with Pd/C and  $\text{H}_2$  (Chen, Q.; Kuriyama, M.; Soeta, T.; Hao, X.; Yamada, K. -I.; Tomioka, K. *Org. Lett.* **2005**, *7*, 4439.) gave the corresponding saturated cyclohexanone derivative. The optical rotation was measured ( $[\alpha]_{\text{D}}^{20} = -12^\circ$  ( $c = 1.0$ ,  $\text{CHCl}_3$ )) and compared to the known literature value (Takaya, Y.; Ogasawara, M.; Hayashi, T. *Tetrahedron Lett.* **1999**, *40*, 6957.).

Achiral GLC (Ultra 1, Hewlett-Packard,  $190^\circ\text{C}$ ) analysis of the crude reaction mixture:

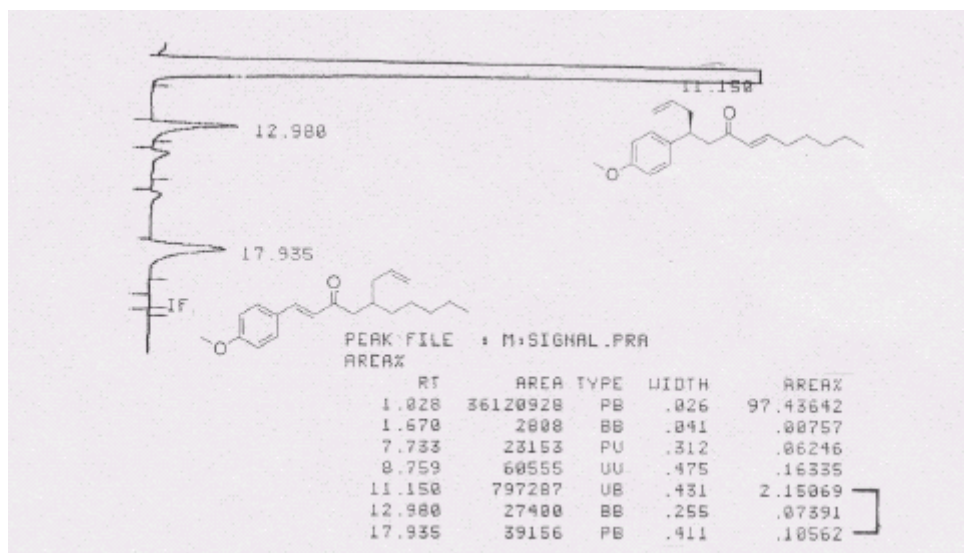

Chiral SFC (AD-H, Chiralpak, 150 bar, 50°C, flow = 1.0 mL/min, 3.0 % MeOH) analysis of conjugate allylation product:

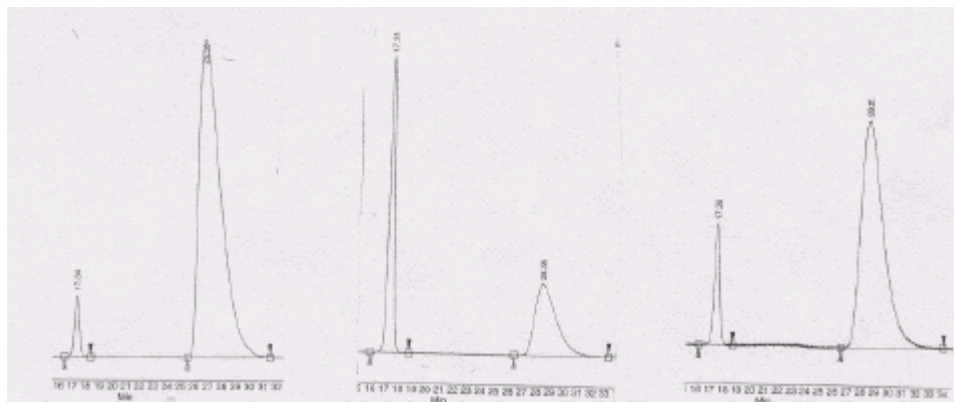

Allylation product

Racemic

Allylation product+ racemic coinjection

| Index | Name    | Start Time [Min] | Time [Min] | End [Min] | RT Offset [Min] | Quantity [% Area] | Height [μV] | Area [μV Min] | Area (%) |
|-------|---------|------------------|------------|-----------|-----------------|-------------------|-------------|---------------|----------|
| 1     | UNKNOWN | 16.44            | 17.34      | 18.38     | 0.00            | 4.33              | 1745.7      | 723.6         | 4.531    |
| 2     | UNKNOWN | 25.52            | 26.58      | 31.52     | 0.00            | 95.67             | 8819.3      | 15983.2       | 95.999   |
| Total |         |                  |            |           |                 | 100.00            | 10665.0     | 16706.9       | 100.000  |



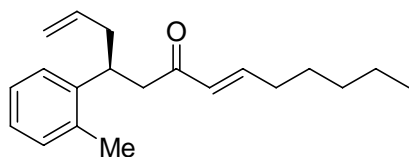

**(*S,E*)-4-*o*-tolyltrideca-1,7-dien-6-one.** An oil.  $R_f = 0.19$  (SiO<sub>2</sub>, 30:1 hexanes:EtOAc); IR (neat): 3069 (m), 3018 (m), 2930 (s), 2861 (s), 1829 (w), 1671 (s), 1627 (s), 1457 (m), 1262 (m) cm<sup>-1</sup>; <sup>1</sup>H NMR (CDCl<sub>3</sub>):  $\delta$  7.00-7.18 (4H, m), 6.73 (1H, dt,  $J = 16$  Hz,  $J = 7.2$  Hz), 5.99 (1H, dt,  $J = 16$  Hz,  $J = 1.2$  Hz), 5.63 (1H, ddt,  $J = 17$  Hz,  $J = 10$  Hz,  $J = 6.8$  Hz), 4.88-5.02 (2H, m) 3.60 (1H, p,  $J = 6.8$  Hz), 2.83 (2H, d,  $J = 6.8$  Hz), 2.35 (5H, m), 2.13 (2H, q,  $J = 6.8$  Hz), 1.39 (2H, p,  $J = 7.2$  Hz), 1.18-1.35 (4 H, m), 0.87 (3H, t,  $J = 6.8$  Hz); <sup>13</sup>C NMR (CDCl<sub>3</sub>):  $\delta$  199.2, 147.5, 142.5, 136.2, 135.9, 130.5, 130.3, 126.0, 125.9, 125.7, 116.5, 45.79, 40.44, 35.65, 32.40, 31.32, 27.76, 22.44, 19.84, 13.97. LRMS (ESI+) Calc'd for C<sub>20</sub>H<sub>28</sub>O (M)<sup>+</sup>: 284.2 Found (M)<sup>+</sup>: 284.8.  $[\alpha]_D^{20} = +6.4^\circ$  ( $c = 0.6$ , CHCl<sub>3</sub>).

**Proof of stereochemistry.** Chemoselectivity was determined using <sup>1</sup>H NMR spectroscopy; the minor isomer was not observed in the crude <sup>1</sup>H NMR spectrum. Enantioselectivities were determined by comparison with authentic racemic material prepared using either triphenylphosphine or triphenylphosphite as the achiral ligand in the conjugate allylation reaction. Absolute stereochemistry was determined by subjecting the conjugate allylation product to ring closing metathesis conditions using the Hoveyda-Grubbs second generation catalyst, in CH<sub>2</sub>Cl<sub>2</sub>, to afford 5-(*o*-tolyl)-2-cyclohexen-1-one (Sieber, J. D.; Liu, S.; Morken, J. P. *J. Am. Chem. Soc.* **2007**, *129*, 2214.). Subsequent 1,4 reduction with Pd/C and H<sub>2</sub> (Chen, Q.; Kuriyama, M.; Soeta, T.; Hao, X.; Yamada, K. -I.; Tomioka, K. *Org. Lett.* **2005**, *7*, 4439.) gave the corresponding saturated cyclohexanone derivative. The optical rotation was measured ( $[\alpha]_D^{20} = -37^\circ$  ( $c = 0.8$ , CCl<sub>4</sub>)) and compared to the known literature value (Ek, M.; Ahlberg, P. *Acta. Chem. Scand. Ser. B* **1984**, *38*, 211.).

*Chiral SFC (AD-H, Chiralpak, 150 bar, 50°C, flow = 1.0 mL/min, 3.0 % MeOH) analysis of conjugate allylation product:*

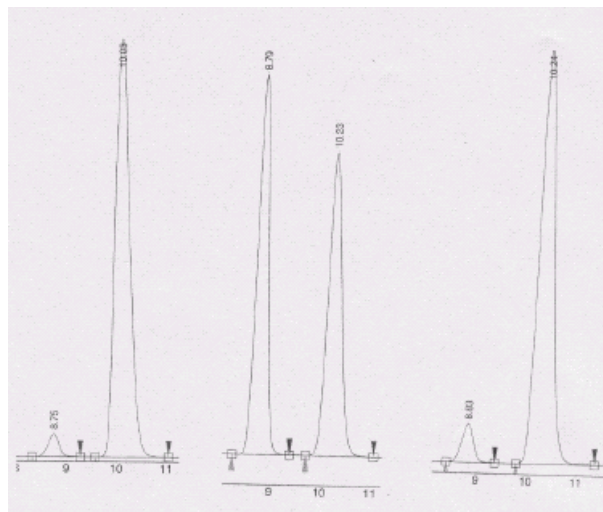

Allylation product

Racemic

Allylation product + racemic coinjection

| Index | Name    | Start Time [Min] | Time [Min] | End [Min] | RT Diff. [Min] | Quantity [% Area] | Height [μV] | Area [μV·Min] | Area [%] |
|-------|---------|------------------|------------|-----------|----------------|-------------------|-------------|---------------|----------|
| 1     | UNKNOWN | 8.31             | 8.75       | 9.28      | 0.00           | 3.82              | 3243.9      | 815.7         | 3.620    |
| 2     | UNKNOWN | 8.58             | 10.03      | 11.05     | 0.00           | 98.08             | 58473.6     | 19995.1       | 96.080   |
| Total |         |                  |            |           |                | 100.00            | 62717.5     | 20810.8       | 100.000  |

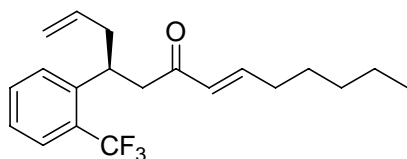

**(*S,E*)-4-(2-(trifluoromethyl)phenyl)trideca-1,7-dien-6-one.** An oil.  $R_f = 0.18$  (SiO<sub>2</sub>, 30:1 hexanes:EtOAc); IR (neat): 2961 (s), 2930 (s), 2861 (s), 1828 (w), 1696 (s), 1457 (m), 1312 (s), 1155 (s), 1117 (s) cm<sup>-1</sup>; <sup>1</sup>H NMR (CDCl<sub>3</sub>):  $\delta$  7.60 (1H, d,  $J = 8.0$  Hz), 7.48 (1H, t,  $J = 7.5$  Hz), 7.39 (1H, d,  $J = 8.0$  Hz), 7.26 (1H, t,  $J = 7.5$  Hz), 6.76 (1H, dt,  $J = 16$  Hz,  $J = 7$  Hz), 6.03 (1H, d,  $J = 16$  Hz), 5.61 (1H, ddt,  $J = 17$  Hz,  $J = 10$  Hz,  $J = 7$  Hz), 4.93 (1H, d,  $J = 17$  Hz), 4.91 (1H, d,  $J = 10$  Hz), 3.74 (1H, p,  $J = 7$  Hz), 2.84 (1H, dd,  $J = 16$  Hz,  $J = 7.5$  Hz), 2.80 (1H, dd,  $J = 16$  Hz,  $J = 6.0$  Hz), 2.40 (2H, t,  $J = 7.5$  Hz), 2.15 (2H, q,  $J = 7.0$  Hz), 1.40 (2H, p,  $J = 7.5$  Hz), 1.18-1.35 (4 H, m), 0.87 (3H, t,  $J = 7$  Hz); <sup>13</sup>C NMR (CDCl<sub>3</sub>):  $\delta$  198.3, 148.0, 143.3, 135.6, 131.8, 130.0, 128.5 (q,  $^2J_{CF} = 29$  Hz), 128.0, 126.2, 125.9 (q,  $^3J_{CF} = 6.1$  Hz), 124.4 (q,  $^1J_{CF} = 272$  Hz), 117.0, 46.45, 40.43, 36.08, 32.38, 31.28, 27.69, 22.39, 13.90. <sup>19</sup>F NMR (CDCl<sub>3</sub>):  $\delta$  -59.81. LRMS (ESI+) Calc'd for C<sub>20</sub>H<sub>25</sub>F<sub>3</sub>O (M)<sup>+</sup>: 338.2 Found (M)<sup>+</sup>: 338.8.

**Proof of stereochemistry.** Chemoselectivity was determined using achiral GLC. To determine the enantioselectivity, the title compound was subjected to ring-closing metathesis (RCM) conditions using the Hoveyda-Grubbs second generation catalyst, in CH<sub>2</sub>Cl<sub>2</sub>, to afford 5-(*o*-trifluoromethylphenyl)-2-cyclohexen-1-one (Sieber, J. D.; Liu, S.; Morken, J. P. *J. Am. Chem. Soc.* **2007**, *129*, 2214.). This derivative was then analyzed by chiral GLC. Stereochemical ratios were determined in comparison with authentic racemic material prepared using either triphenylphosphine or triphenylphosphite as the achiral ligand in the conjugate allylation reaction followed by RCM. Absolute stereochemistry was assumed to be analogous to the configuration determined for others.

*Achiral GLC (Ultra 1, Hewlett-Packard, 150 °C) analysis of the crude reaction mixture:*

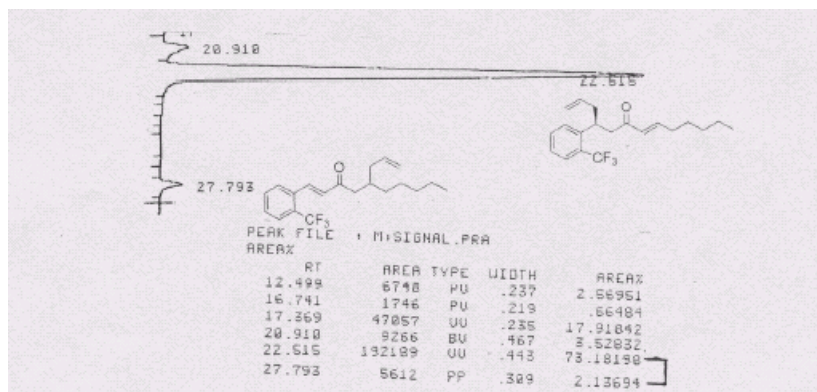

Chiral SFC ((*R,R*)-Whelk-O, Pirkle Covalent, 150 bar, 50°C, flow = 2.0 mL/min, 2.0 % MeOH) analysis of conjugate allylation-RCM product:

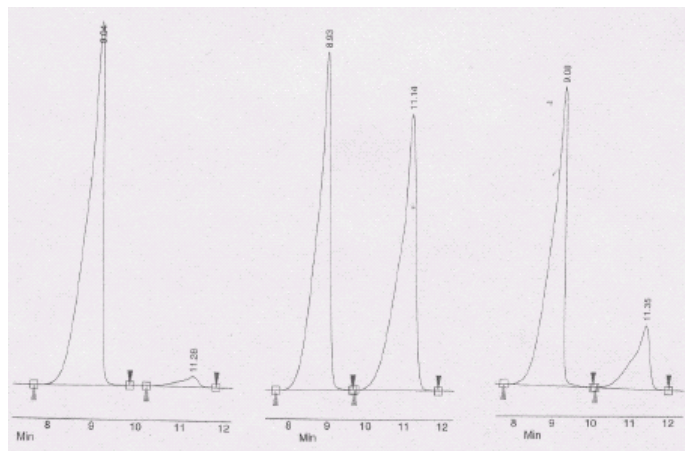

Allylation-  
RCM  
product

Racemic

Allylation-RCM  
product + racemic  
coinjection

| Index | Name    | Start<br>[Min] | Time<br>[Min] | End<br>[Min] | RT Offset<br>[Min] | Clarity<br>[% Area] | Height<br>[μV] | Area<br>[μV·Min] | Area<br>[%] |
|-------|---------|----------------|---------------|--------------|--------------------|---------------------|----------------|------------------|-------------|
| 1     | UNKNOWN | 7.67           | 8.04          | 8.85         | 0.00               | 96.59               | 7084.9         | 2845.1           | 96.588      |
| 2     | UNKNOWN | 10.23          | 11.28         | 11.81        | 0.00               | 3.41                | 201.4          | 100.5            | 3.412       |
| Total |         |                |               |              |                    | 100.00              | 7286.3         | 2945.6           | 100.000     |

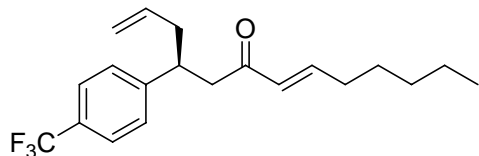

**(S,E)-4-(4-(trifluoromethyl)phenyl)trideca-1,7-dien-6-one.** An oil.

$R_f$ (major) = 0.19 (SiO<sub>2</sub>, 30:1 hexanes:EtOAc),  $R_f$ (minor) = 0.24 (SiO<sub>2</sub>, 30:1 hexanes:EtOAc); IR (neat): 2961 (s), 2930 (s), 2854 (m), 1702

(m), 1677 (s), 1620 (s), 1331 (s), 1167 (s), 1123 (s) cm<sup>-1</sup>; <sup>1</sup>H NMR

(CDCl<sub>3</sub>): δ 7.51 (2H, d,  $J$  = 8.0 Hz), 7.29 (2H, d,  $J$  = 8.0 Hz), 6.74 (1H,

dt,  $J$  = 16 Hz,  $J$  = 7 Hz), 5.99 (1H, d,  $J$  = 16 Hz), 5.61 (1H, ddt,  $J$  = 17 Hz,  $J$  = 10 Hz,  $J$  = 7 Hz), 4.96 (1H, d,  $J$

= 17 Hz), 4.95 (1H, d,  $J$  = 10 Hz), 3.38 (1H, p,  $J$  = 7.5 Hz), 2.86 (1H, dd,  $J$  = 17 Hz,  $J$  = 7.0 Hz), 2.83 (1H, dd,  $J$

= 17 Hz,  $J$  = 7.5 Hz), 2.39 (1H, dd,  $J$  = 14 Hz,  $J$  = 7.0 Hz), 2.36 (1H, dd,  $J$  = 14 Hz,  $J$  = 7.0 Hz), 2.14 (2H, q,  $J$  =

7.0 Hz), 1.39 (2H, p,  $J$  = 7.0 Hz), 1.20-1.33 (4 H, m), 0.86 (3H, t,  $J$  = 7.0 Hz); <sup>13</sup>C NMR (CDCl<sub>3</sub>): δ 198.5,

148.4, 148.0, 135.6, 130.4, 128.6 (q, <sup>2</sup> $J_{CF}$  = 32 Hz), 127.9, 125.3 (q, <sup>3</sup> $J_{CF}$  = 3.9 Hz), 124.2 (q, <sup>1</sup> $J_{CF}$  = 271 Hz),

117.2, 45.60, 40.65, 40.39, 32.38, 31.30, 27.69, 22.36, 13.89. <sup>19</sup>F NMR (CDCl<sub>3</sub>): δ -63.72. LRMS (ESI+)

Calc'd for C<sub>20</sub>H<sub>25</sub>F<sub>3</sub>O (M)<sup>+</sup>: 338.2 Found (M)<sup>+</sup>: 338.8.

**Proof of stereochemistry.** Chemoselectivity was determined using achiral GLC. To determine the enantioselectivity, the title compound was subjected to ring-closing metathesis (RCM) conditions using the Hoveyda-Grubbs second generation catalyst, in CH<sub>2</sub>Cl<sub>2</sub>, to afford 5-(*p*-trifluoromethylphenyl)-2-cyclohexen-1-one (Sieber, J. D.; Liu, S.; Morken, J. P. *J. Am. Chem. Soc.* **2007**, *129*, 2214.). This derivative was then analyzed by chiral SFC. Stereochemical ratios were determined in comparison with authentic racemic material prepared using either triphenylphosphine or triphenylphosphite as the achiral ligand in the conjugate allylation reaction followed by RCM. Absolute stereochemistry was determined by comparing the optical rotation ( $[\alpha]_D^{20}$  = +37° ( $c$  = 1.0, CHCl<sub>3</sub>)) of the RCM product to the known value (Chen, Q.; Kuriyama, M.; Soeta, T.; Hao, X.; Yamada, K. -I.; Tomioka, K. *Org. Lett.* **2005**, *7*, 4439).

*Achiral GLC (Ultra 1, Hewlett-Packard, 170 °C) analysis of the crude reaction mixture:*

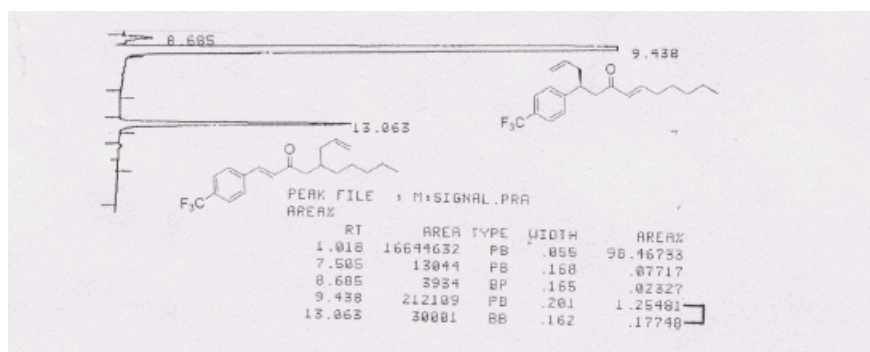

Chiral GLC ( $\beta$ -dex, Supelco, 130°C) analysis of conjugate allylation-RCM product:

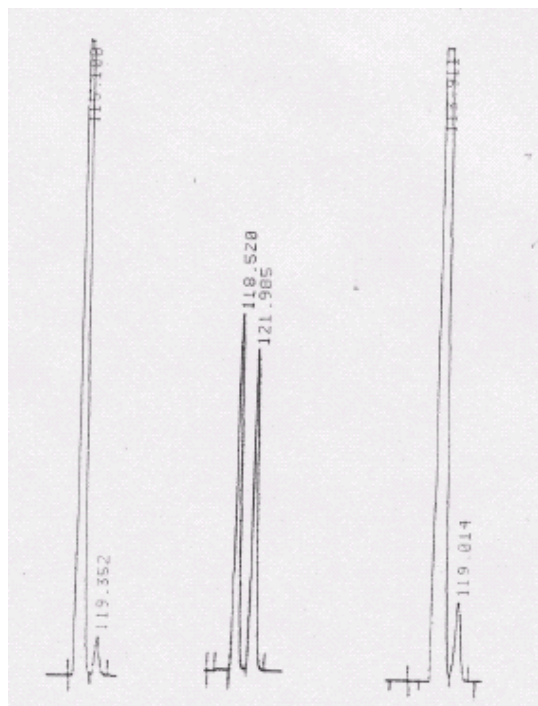

| RT      | AREA   | TYPE | WIDTH | AREAX    |
|---------|--------|------|-------|----------|
| 67.390  | 6640   | PU   | .592  | 3.01808  |
| 115.100 | 206228 | PU   | 1.132 | 93.73702 |
| 119.352 | 7139   | UB   | 1.072 | 3.24490  |

Allylation-  
RCM  
product

Racemic

Allylation-RCM  
product + racemic  
coinjection

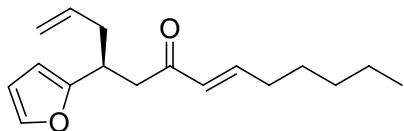

**(*S,E*)-4-(furan-2-yl)trideca-1,7-dien-6-one.** An oil. Isolated as an inseparable mixture of constitutional isomers.  $R_f = 0.16$  (SiO<sub>2</sub>, 30:1 Hexanes:EtOAc, both constitutional isomers); IR (neat): 3074 (w), 2955 (s), 2930 (s), 2854 (m), 1671 (s), 1626 (s), 1444 (m), 1362 (m) cm<sup>-1</sup>; <sup>1</sup>H NMR

(CDCl<sub>3</sub>):  $\delta$  7.47 (1H, d,  $J = 3.2$  Hz, minor), 7.28 (1H, d,  $J = 16$  Hz, minor), 7.27 (1H, dd,  $J = 2.0$  Hz,  $J = 1.2$  Hz, major), 6.77 (1H, dt,  $J = 16$  Hz,  $J = 7.2$  Hz, major), 6.64 (1H, d,  $J = 2.0$  Hz, minor), 6.61 (1H, d,  $J = 16$  Hz, minor), 6.46 (1H, dd,  $J = 3.2$  Hz,  $J = 2.0$  Hz, minor), 6.23 (1H, dd,  $J = 3.2$  Hz,  $J = 2.0$  Hz, major), 6.03 (1H, dt,  $J = 16$  Hz,  $J = 1.2$  Hz, major), 5.98 (1H, d,  $J = 3.2$  Hz, major), 5.67 (1H, ddt,  $J = 17$  Hz,  $J = 10$  Hz,  $J = 7.2$  Hz, major), 4.94-5.04 (4H, m, major + minor), 3.43 (1H, p,  $J = 7.2$  Hz, major), 2.87 (1H, dd,  $J = 16$  Hz,  $J = 7.2$  Hz, major), 2.75 (1H, dd,  $J = 16$  Hz,  $J = 6.8$  Hz, major), 2.53 (1H, dd,  $J = 16$  Hz,  $J = 6.4$  Hz, minor), 2.45 (1H, dd,  $J = 16$  Hz,  $J = 5.6$  Hz, minor), 2.28-2.46 (3H, m, major + minor), 1.42 (2H, p,  $J = 7.6$  Hz, major), 1.18-1.35 (12H, m, major + minor), 0.87 (3H, t,  $J = 6.8$  Hz, major), 0.85 (3H, t,  $J = 7.2$  Hz, minor); <sup>13</sup>C NMR (CDCl<sub>3</sub>):  $\delta$  (major) 198.7, 157.1, 147.8, 140.9, 135.7, 130.4, 116.9, 109.9, 105.1, 43.06, 38.00, 34.27, 32.46, 31.34, 27.76, 22.45, 13.98. LRMS (ESI+) Calc'd for C<sub>17</sub>H<sub>24</sub>O<sub>2</sub> (M)<sup>+</sup>: 260.2 Found (M)<sup>+</sup>: 260.7.

**Proof of stereochemistry.** Chemoselectivity was determined using achiral GLC. Enantioselectivities were determined by comparison with authentic racemic material prepared using either triphenylphosphine or triphenylphosphite as the achiral ligand in the conjugate allylation reaction. Absolute stereochemistry was assumed to be analogous to the configuration determined for others.

*Achiral GLC (Ultra 1, Hewlett-Packard, 145 °C) analysis of the crude reaction mixture:*

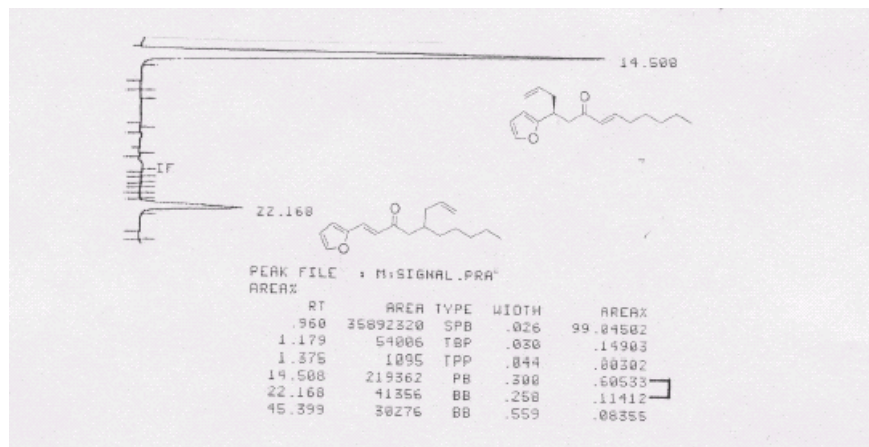

Chiral SFC (AD-H, Chiralpak, 150 bar, 50°C, flow = 1.0 mL/min, 1.0 % MeOH) analysis of conjugate allylation product:

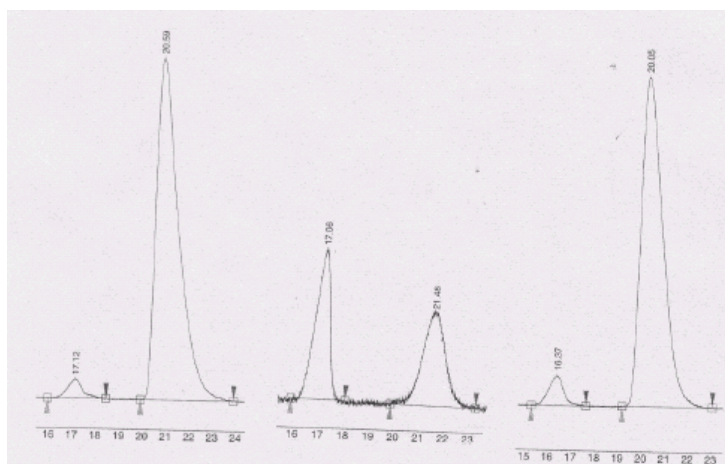

Allylation product

Racemic

Allylation product + racemic coinjection

| Index | Name    | Start Time [Min] | Time [Min] | End [Min] | RT Offset [Min] | Quantity [% Area] | Height [μV] | Area [μV·Min] | Area [%] |
|-------|---------|------------------|------------|-----------|-----------------|-------------------|-------------|---------------|----------|
| 1     | UNKNOWN | 15.94            | 17.12      | 18.44     | 0.00            | 3.56              | 418.5       | 309.5         | 3.564    |
| 2     | UNKNOWN | 19.91            | 20.59      | 23.00     | 0.00            | 96.44             | 7531.5      | 8378.8        | 96.436   |
| Total |         |                  |            |           |                 | 100.00            | 7949.9      | 8688.3        | 100.000  |

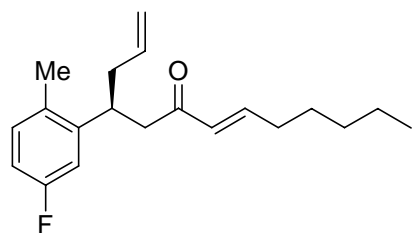

**(*S,E*)-4-(5-fluoro-2-methylphenyl)trideca-1,7-dien-6-one.** An oil.  $R_f = 0.18$  ( $\text{SiO}_2$ , 30:1 hexanes:EtOAc); IR (neat): 3075 (w), 3031 (w), 2955 (s), 2924 (s), 2861 (s), 1841 (w), 1697 (s), 1665 (s), 1621 (s), 1495 (s), 1457 (m), 1237 (m)  $\text{cm}^{-1}$ ;  $^1\text{H}$  NMR ( $\text{CDCl}_3$ ): 7.03 (1H, dd,  $J = 8.4$  Hz,  $J = 6.0$  Hz), 6.68-6.85 (3H, m), 5.99 (1H, dt,  $J = 16$  Hz,  $J = 1.6$  Hz), 5.60 (1H, ddt,  $J = 17$  Hz,  $J = 10$  Hz,  $J = 6.8$  Hz), 4.96 (1H, d,  $J = 17$  Hz), 4.93 (1H, d,  $J = 10$  Hz), 3.57 (1H, p,  $J = 7.2$  Hz), 2.82 (1H, app dd,  $J = 16$  Hz,  $J = 6.4$  Hz), 2.78 (1H, app dd,  $J = 16$  Hz,  $J = 7.2$  Hz), 2.22-2.39 (5H, m), 2.13 (2H, q,  $J = 7.2$  Hz), 1.40 (2H, p,  $J = 7.2$  Hz), 1.17-1.34 (4H, m), 0.86 (3H, t,  $J = 7.2$  Hz);  $^{13}\text{C}$  NMR ( $\text{CDCl}_3$ ):  $\delta$  198.6, 161.4 (d,  $^1J_{\text{CF}} = 241$  Hz), 147.7, 144.7 (d,  $^3J_{\text{CF}} = 6.2$  Hz), 135.7, 131.42, 131.36 (d,  $^3J_{\text{CF}} = 4.7$  Hz), 130.4, 116.9, 112.5 (d,  $^2J_{\text{CF}} = 21$  Hz), 112.4 (d,  $^2J_{\text{CF}} = 21$  Hz), 45.43, 40.29, 35.73, 32.37, 31.28, 27.70, 22.39, 19.06, 13.91;  $^{19}\text{F}$  NMR ( $\text{CDCl}_3$ ):  $\delta$  93.93 (m). LRMS (ESI+) Calc'd for  $\text{C}_{20}\text{H}_{27}\text{FO}$  ( $\text{M} + \text{Na}$ ) $^+$ : 325.2 Found ( $\text{M} + \text{Na}$ ) $^+$ : 324.7.

**Proof of stereochemistry.** GLC analysis of the crude reaction mixture was used to determine the chemoselectivity of the reaction (Note: the starting material had the same retention time as the major isomer. The reported ratios are calculated assuming 95% conversion as evident by the appearance of no starting material in the crude  $^1\text{H}$  NMR spectrum.). The enantioselectivity was determined by measuring the enantiomeric excess of the cyclic enone after ring-closing metathesis (Scheme 2, eq 1) and is described below. Stereochemical ratios were determined in comparison with authentic racemic material prepared using either triphenylphosphine or triphenylphosphite as the achiral ligand in the conjugate allylation reaction followed by RCM.

*Achiral GLC (Ultra 1, Hewlett-Packard, 180 °C) analysis of the crude reaction mixture:*

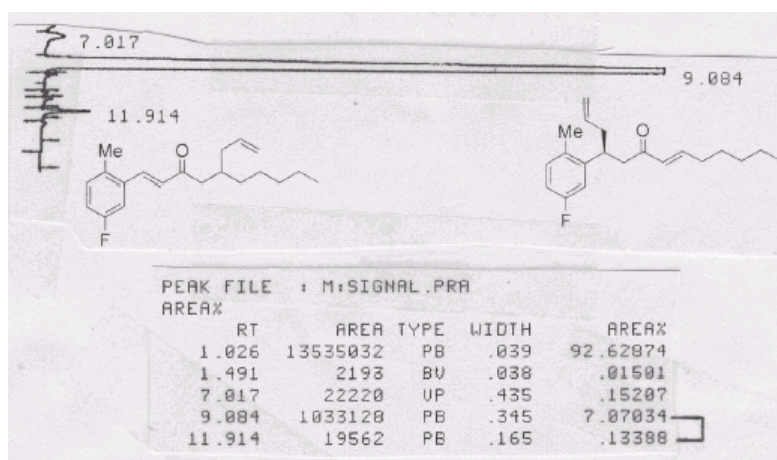



Chiral GLC ( $\beta$ -dex, Supelco, 135°C) analysis of conjugate allylation-RCM product:

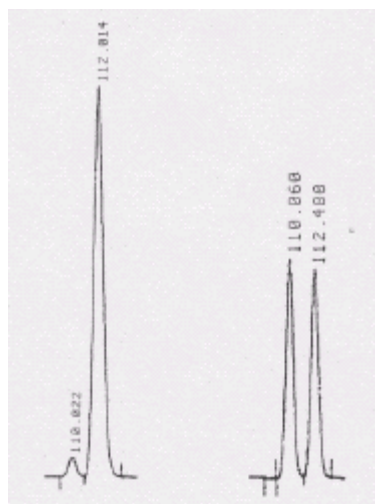

SIGNAL FILE: M+SIGNAL.BNR  
AREAX

| RT      | AREA     | TYPE | WIDTH | AREAX    |
|---------|----------|------|-------|----------|
| 1.359   | 34250624 | BB   | .095  | 99.03722 |
| 71.494  | 6768     | PS   | .578  | .01957   |
| 110.022 | 13148    | PU   | .796  | .03799   |
| 112.014 | 313059   | UB   | .935  | .98522   |

TOTAL AREA=3.4684E+07  
MUL FACTOR=1.0000E+00

Allylation-  
RCM  
product

Racemic

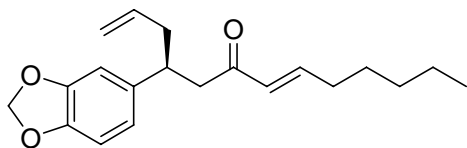

**(*S,E*)-4-(benzo[*d*][1,3]dioxol-5-yl)trideca-1,7-dien-6-one.** An oil.  $R_f = 0.27$  (SiO<sub>2</sub>, 15:1 pentane:Et<sub>2</sub>O); IR (neat): 3075 (m), 2962 (s), 2930 (s), 2855 (s), 1841 (w), 1671 (s), 1627 (s), 1483 (s), 1444 (s), 1350 (m), 1243 (s) cm<sup>-1</sup>; <sup>1</sup>H NMR (CDCl<sub>3</sub>):  $\delta$  6.55-6.80 (4H, m), 5.99 (1H, d,  $J = 16$  Hz), 5.89 (2H, s), 5.62 (1H, ddt,  $J = 17$  Hz,  $J = 10$  Hz,  $J = 7.2$  Hz), 4.90-5.05 (2H, m), 3.21 (1H, p,  $J = 7.2$  Hz), 2.76 (2H, d,  $J = 6.8$  Hz), 2.31 (2H, m), 2.13 (2H, q,  $J = 7.6$  Hz), 1.40 (2H, p,  $J = 7.2$  Hz), 1.16-1.36 (4H, m), 0.86 (3H, t,  $J = 6.8$  Hz); <sup>13</sup>C NMR (CDCl<sub>3</sub>):  $\delta$  199.0, 147.6, 147.5, 145.8, 138.1, 136.2, 130.5, 120.5, 116.6, 108.1, 107.7, 100.8, 46.27, 40.84, 40.83, 32.41, 31.33, 27.76, 22.42, 13.96. LRMS (ESI+) Calc'd for C<sub>20</sub>H<sub>26</sub>O<sub>3</sub> (M)<sup>+</sup>: 314.2 Found (M)<sup>+</sup>: 314.8.  $[\alpha]_D^{20} = +11^\circ$  ( $c = 3.0$ , CHCl<sub>3</sub>).

**Proof of stereochemistry.** Chemoselectivity was determined using achiral GLC. Enantioselectivities were determined by comparison with authentic racemic material prepared using either triphenylphosphine or triphenylphosphite as the achiral ligand in the conjugate allylation reaction. Absolute stereochemistry was assumed to be analogous to the configuration determined for others.

*Achiral GLC (Ultra 1, Hewlett-Packard, 190 °C) analysis of the crude reaction mixture:*

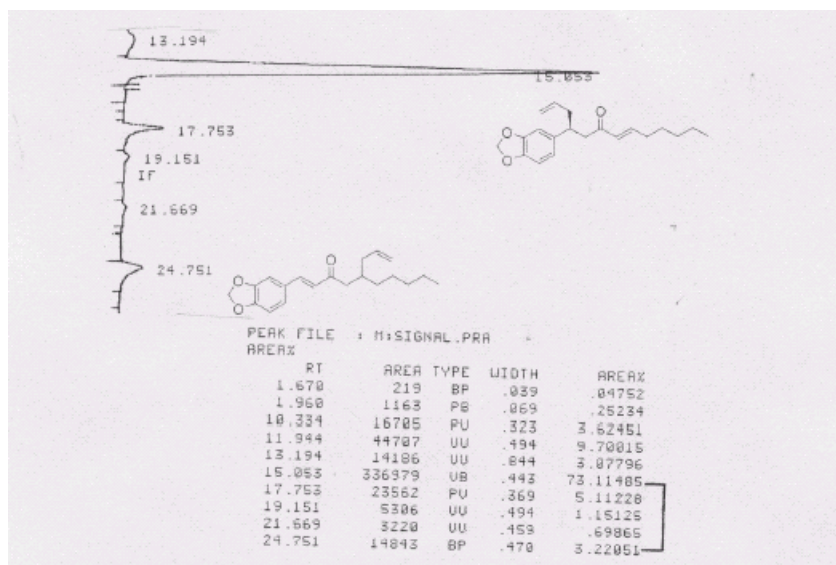

Chiral SFC (AD-H, Chiralpak, 150 bar, 50°C, flow = 2.0 mL/min, 3.0 % MeOH) analysis of conjugate allylation product:

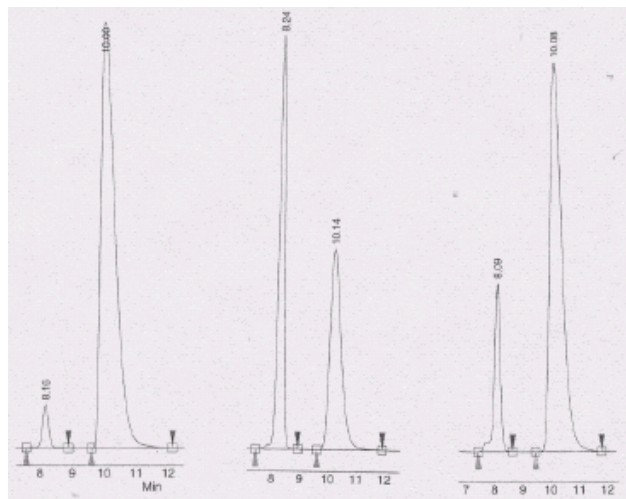

| Index | Name    | Start Time [Min] | Time [Min] | End [Min] | RT Offset [Min] | Quantity [% Area] | Height [μV] | Area [μV.Min] | Area [%] |
|-------|---------|------------------|------------|-----------|-----------------|-------------------|-------------|---------------|----------|
| 1     | UNKNOWN | 7.56             | 8.16       | 8.88      | 0.00            | 4.16              | 1581.6      | 351.2         | 4.161    |
| 2     | UNKNOWN | 9.81             | 10.00      | 12.13     | 0.00            | 95.84             | 15664.4     | 8090.9        | 95.839   |
| Total |         |                  |            |           |                 | 100.00            | 17246.0     | 8442.1        | 100.000  |

Allylation product

Racemic

Allylation product + racemic coinjection

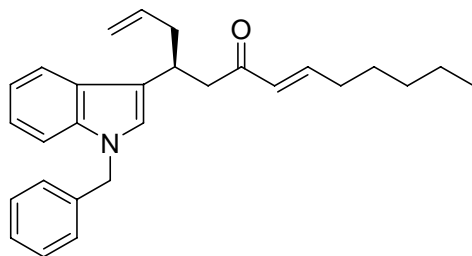

**(*S,E*)-4-(1-benzyl-1*H*-indol-3-yl)trideca-1,7-dien-6-one.** An oil.  $R_f = 0.10$  (SiO<sub>2</sub>, 2:1 pentane:CH<sub>2</sub>Cl<sub>2</sub>); IR (neat): 3062 (m), 2924 (s), 2848 (s), 1697 (s), 1671 (s), 1463 (s), 1350 (s) cm<sup>-1</sup>; <sup>1</sup>H NMR (CDCl<sub>3</sub>):  $\delta$  7.68 (1H, d,  $J = 7.5$  Hz), 7.00-7.32 (8H, m), 6.91 (1H, s), 6.72 (1H, dt,  $J = 16$  Hz,  $J = 6.8$  Hz), 6.02 (1H, d,  $J = 16$  Hz), 5.75 (1H, ddt,  $J = 17$  Hz,  $J = 10$  Hz,  $J = 7.2$  Hz), 5.25 (2H, s), 5.00 (1H, d,  $J = 17$  Hz), 4.95 (1H, d,  $J = 10$  Hz), 3.66 (1H, p,  $J = 7.2$  Hz), 2.97 (2H, dd,  $J = 16$  Hz,  $J = 7.6$  Hz), 2.93 (1H, dd,  $J = 16$  Hz,  $J = 7.6$  Hz), 2.56 (1H, dd,  $J = 14$  Hz,  $J = 6.8$  Hz), 2.52 (1H, dd,  $J = 14$  Hz,  $J = 6.4$  Hz), 2.09 (2H, q,  $J = 6.8$  Hz), 1.15-1.40 (6H, m), 0.87 (3H, t,  $J = 7.2$  Hz); <sup>13</sup>C NMR (CDCl<sub>3</sub>):  $\delta$  199.8, 147.4, 137.6, 136.7, 130.5, 128.6, 127.4, 127.2, 126.5, 125.4, 121.6, 119.5, 118.9, 118.0, 116.3, 109.7, 49.84, 45.36, 39.74, 32.65, 32.38, 31.31, 27.68, 22.41, 13.97. LRMS (ESI+) Calc'd for C<sub>28</sub>H<sub>33</sub>NO (M)<sup>+</sup>: 399.3 Found (M)<sup>+</sup>: 399.8.  $[\alpha]_D^{20} = +15^\circ$  ( $c = 3.5$ , CHCl<sub>3</sub>).

**Proof of stereochemistry.** Chemoselectivity was determined using <sup>1</sup>H NMR spectroscopy; the minor isomer was not observed in the crude <sup>1</sup>H NMR spectrum. Enantioselectivities were determined by comparison with authentic racemic material prepared using either triphenylphosphine or triphenylphosphite as the achiral ligand in the conjugate allylation reaction. Absolute stereochemistry was assumed to be analogous to the configuration determined for others.

*Chiral SFC (AS-H, Chiralpak, 150 bar, 50°C, flow = 1.0 mL/min, 4.0 % MeOH) analysis of conjugate allylation product:*

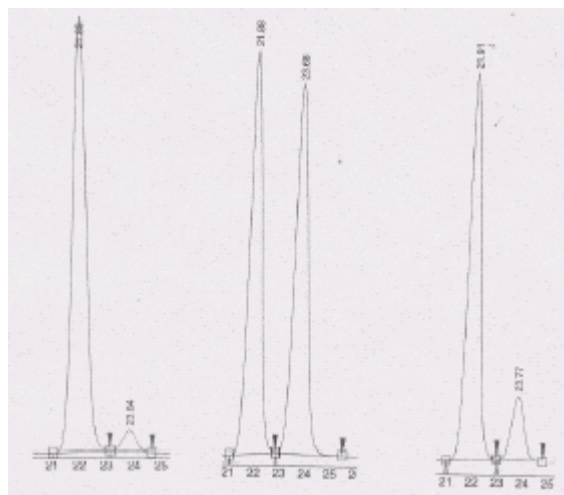

| Index | Name    | Start Time [Min] | Time [Min] | End Time [Min] | RT Offset [Min] | Quantity [% Area] | Height [ $\mu$ V] | Area [ $\mu$ V.Min] | Area [%] |
|-------|---------|------------------|------------|----------------|-----------------|-------------------|-------------------|---------------------|----------|
| 1     | UNKNOWN | 21.05            | 21.89      | 23.12          | 0.00            | 95.82             | 59925.6           | 34096.0             | 95.822   |
| 2     | UNKNOWN | 23.14            | 23.84      | 24.07          | 0.00            | 4.18              | 2598.5            | 1485.2              | 4.178    |
| Total |         |                  |            |                |                 | 100.00            | 62824.1           | 35551.3             | 100.000  |

Allylation product

Racemic

Allylation product + racemic coinjection

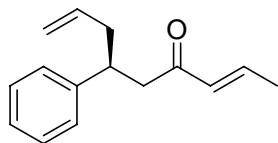

**(*S,E*)-6-phenylnona-2,8-dien-4-one.** An oil.  $R_f = 0.20$  ( $\text{SiO}_2$ , 15:1 pentane:Et<sub>2</sub>O); IR (neat): 3069 (m), 3024 (m), 2911 (m), 1697 (s), 1671 (s), 1627 (s), 1495 (m), 1439 (m)  $\text{cm}^{-1}$ ; <sup>1</sup>H NMR ( $\text{CDCl}_3$ ):  $\delta$  7.10-7.35 (5H, m), 6.76 (1H, dq,  $J = 16$  Hz,  $J = 6.8$  Hz), 6.03 (1H, dq,  $J = 16$  Hz,  $J = 1.6$  Hz), 5.63 (1H, ddt,  $J = 17$  Hz,  $J = 10$  Hz,  $J = 6.8$  Hz), 4.86-5.05 (2H, m), 3.30 (1H, p,  $J = 7.2$  Hz), 2.83 (1H, dd,  $J = 16$  Hz,  $J = 6.8$  Hz), 2.81 (1H, dd,  $J = 16$  Hz,  $J = 7.2$  Hz), 2.37 (2H, t,  $J = 7.2$  Hz), 1.82 (3H, dd,  $J = 6.8$  Hz,  $J = 1.6$  Hz); <sup>13</sup>C NMR ( $\text{CDCl}_3$ ):  $\delta$  198.7, 144.2, 142.4, 136.2, 132.1, 128.3, 127.5, 126.2, 116.6, 46.03, 40.85, 40.60, 18.18. LRMS (ESI+) Calc'd for C<sub>15</sub>H<sub>18</sub>O (M + Na)<sup>+</sup>: 237.1 Found (M + Na)<sup>+</sup>: 236.7.  $[\alpha]_D^{20} = +9.3^\circ$  ( $c = 2.5$ ,  $\text{CHCl}_3$ ).

**Proof of stereochemistry.** Chemoselectivity was determined by <sup>1</sup>H NMR spectroscopy; the minor isomer was not observed in the crude <sup>1</sup>H NMR spectrum. Stereochemical ratios were determined in comparison with authentic racemic material prepared using either triphenylphosphine or triphenylphosphite as the achiral ligand in the conjugate allylation reaction. Absolute stereochemistry was determined by subjecting the conjugate allylation product to ring closing metathesis conditions using the Hoveyda-Grubbs second generation catalyst, in CH<sub>2</sub>Cl<sub>2</sub>, to afford 5-phenyl-2-cyclohexen-1-one (Sieber, J. D.; Liu, S.; Morken, J. P. *J. Am. Chem. Soc.* **2007**, *129*, 2214.). The optical rotation was measured ( $[\alpha]_D^{20} = +37^\circ$  ( $c = 0.5$ ,  $\text{CHCl}_3$ )) and compared to the known literature value (Hareau, G. P.-J.; Koiwa, M.; Hikichi, S; Sato, F. *J. Am. Chem. Soc.* **1999**, *121*, 3640).

*Chiral SFC (AD-H, Chiralpak, 150 bar, 50°C, flow = 1.0 mL/min, 2.0 % MeOH) analysis of conjugate allylation product:*

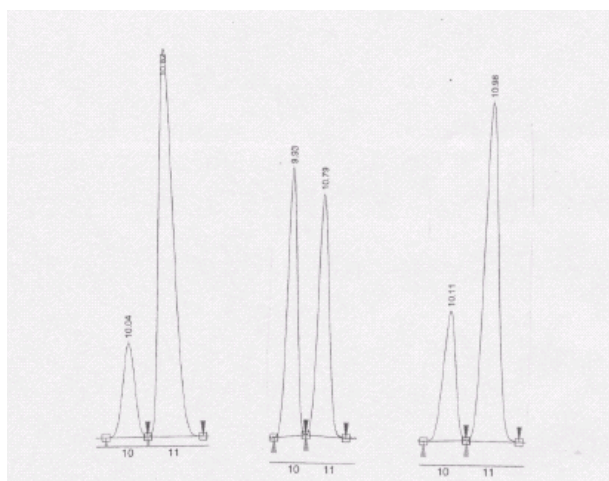

Allylation product      Racemic      Allylation product + racemic coinjection

| Index | Name    | Start Time (Min) | Time (Min) | End Time (Min) | RT Offset (Min) | Quantity (% Area) | Height (μV) | Area (μV.Min) | Area (%) |
|-------|---------|------------------|------------|----------------|-----------------|-------------------|-------------|---------------|----------|
| 1     | UNKNOWN | 9.54             | 10.04      | 10.44          | 0.00            | 16.58             | 7007.1      | 2098.0        | 16.579   |
| 2     | UNKNOWN | 10.44            | 10.82      | 11.64          | 0.00            | 83.42             | 28704.2     | 10556.3       | 83.421   |
| Total |         |                  |            |                |                 | 100.00            | 35711.3     | 12654.3       | 100.000  |

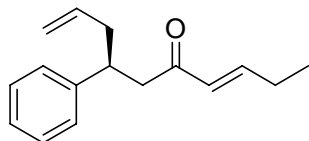

**(*S,E*)-7-phenyldeca-3,9-dien-5-one.** An oil.  $R_f = 0.22$  (SiO<sub>2</sub>, 20:1 Hexanes:EtOAc); IR (neat): 3068 (m), 3024 (m), 2968 (s), 2924 (s), 1948 (w), 1804 (w), 1697 (s), 1627 (s), 1451 (m) cm<sup>-1</sup>; <sup>1</sup>H NMR (CDCl<sub>3</sub>):  $\delta$  7.12-7.32 (5H, m), 6.78 (1H, dt,  $J = 16$  Hz,  $J = 6.8$  Hz), 5.99 (1H, d,  $J = 16$  Hz), 5.63 (1H, ddt,  $J = 17$  Hz,  $J = 10$  Hz,  $J = 6.8$  Hz), 4.86-5.05 (2H, m) 3.29 (1H, p,  $J = 7.2$  Hz), 2.84 (1H, app dd,  $J = 16$  Hz,  $J = 6.8$  Hz), 2.82 (1H, app dd,  $J = 16$  Hz,  $J = 7.2$  Hz), 2.37 (2H, t,  $J = 7.2$  Hz), 2.16 (2H, p,  $J = 7.2$  Hz), 1.00 (3H, t,  $J = 7.2$  Hz); <sup>13</sup>C NMR (CDCl<sub>3</sub>):  $\delta$  199.1, 148.7, 144.2, 136.2, 129.6, 128.3, 127.5, 126.3, 116.6, 46.12, 40.96, 40.63, 25.50, 12.25. LRMS (ESI+) Calc'd for C<sub>16</sub>H<sub>20</sub>O (M + Na)<sup>+</sup>: 251.2 Found (M + Na)<sup>+</sup>: 250.7.  $[\alpha]_D^{20} = +8.8^\circ$  ( $c = 1.0$ , CHCl<sub>3</sub>).

**Proof of stereochemistry.** Chemoselectivity was determined by <sup>1</sup>H NMR spectroscopy; the minor isomer was not observed in the crude <sup>1</sup>H NMR spectrum. Stereochemical ratios were determined in comparison with authentic racemic material prepared using either triphenylphosphine or triphenylphosphite as the achiral ligand in the conjugate allylation reaction. Absolute stereochemistry was determined by subjecting the conjugate allylation product to ring closing metathesis conditions using the Hoveyda-Grubbs second generation catalyst, in CH<sub>2</sub>Cl<sub>2</sub>, to afford 5-phenyl-2-cyclohexen-1-one (Sieber, J. D.; Liu, S.; Morken, J. P. *J. Am. Chem. Soc.* **2007**, *129*, 2214.). The optical rotation was measured ( $[\alpha]_D^{20} = +41^\circ$  ( $c = 0.5$ , CHCl<sub>3</sub>)) and compared to the known literature value (Hareau, G. P.-J.; Koiwa, M.; Hikichi, S; Sato, F. *J. Am. Chem. Soc.* **1999**, *121*, 3640).

*Chiral SFC (AD-H, Chiralpak, 150 bar, 50°C, flow = 1.0 mL/min, 1.0 % MeOH) analysis of conjugate allylation product:*

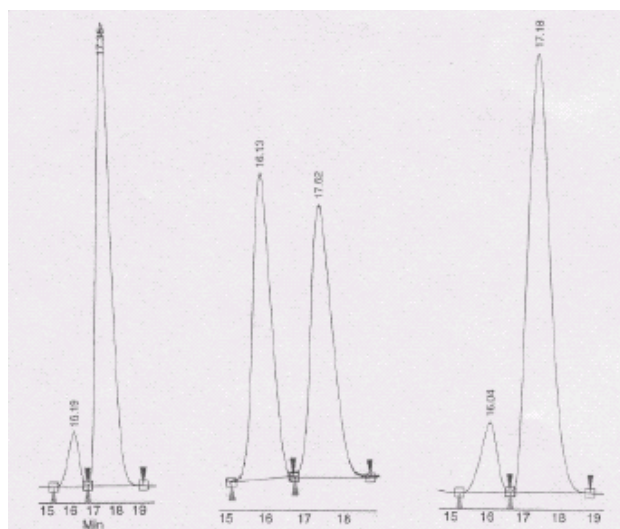

Allylation  
product

Racemic

Allylation product  
+ racemic  
coinjection

| Index | Name    | Start Time [Min] | End Time [Min] | RT Offset [Min] | Quantity [% Area] | Height [μV] | Area [μV.Min] | Area [%] |         |         |
|-------|---------|------------------|----------------|-----------------|-------------------|-------------|---------------|----------|---------|---------|
| 1     | UNKNOWN | 15.30            | 16.19          | 16.77           | 0.00              | 8.10        | 1837.9        | 1005.9   | 8.096   |         |
| 2     | UNKNOWN | 16.79            | 17.36          | 19.18           | 0.00              | 91.90       | 15978.7       | 11430.1  | 91.904  |         |
| Total |         |                  |                |                 |                   |             | 100.00        | 17816.7  | 12436.9 | 100.000 |

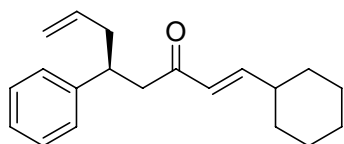

**(*S,E*)-1-cyclohexyl-5-phenylocta-1,7-dien-3-one.** An oil. Isolated as an inseparable mixture of constitutional isomers.  $R_f = 0.19$  ( $\text{SiO}_2$ , 30:1 Hexanes:EtOAc, major+minor); IR (neat): 3069 (m), 3024 (m), 2924 (s), 2855 (s), 1948 (w), 1810 (w), 1700 (s), 1671 (s), 1627 (s), 1445 (s)  $\text{cm}^{-1}$ ;  $^1\text{H}$  NMR ( $\text{CDCl}_3$ ), (only major isomer data shown, minor isomer has been characterized previously:

Sieber, J. D.; Liu, S.; Morken, J. P. *J. Am. Chem. Soc.* **2007**, *129*, 2214.):  $\delta$  7.10-7.30 (5H, m), 6.64 (1H, dd,  $J = 16$  Hz,  $J = 6.8$  Hz), 5.93 (1H, dd,  $J = 16$  Hz,  $J = 1.2$  Hz), 5.63 (1H, ddt,  $J = 17$  Hz,  $J = 10$  Hz,  $J = 6.8$  Hz), 4.85-5.05 (2H, m) 3.28 (1H, p,  $J = 7.2$  Hz), 2.83 (1H, dd,  $J = 16$  Hz,  $J = 6.8$  Hz), 2.81 (1H, dd,  $J = 16$  Hz,  $J = 7.6$  Hz), 2.37 (2H, t,  $J = 7.2$  Hz), 2.05 (1H, m), 0.92-1.80 (10H, m);  $^{13}\text{C}$  NMR ( $\text{CDCl}_3$ , major + minor isomers):  $\delta$  200.4, 199.4, 152.3, 144.2, 142.0, 137.4, 136.2, 134.6, 130.2, 128.8, 128.3, 128.2, 128.0, 127.5, 126.5, 126.2, 116.5, 116.2, 46.13, 42.58, 41.09, 40.59, 40.54, 40.44, 39.22, 35.91, 37.74, 30.09, 29.71, 26.72, 25.92, 25.69. LRMS (ESI+) Calc'd for  $\text{C}_{20}\text{H}_{26}\text{O}$  ( $\text{M} + \text{Na}$ ) $^+$ : 305.2 Found ( $\text{M} + \text{Na}$ ) $^+$ : 304.8.

**Proof of stereochemistry.** Chemoselectivity was determined by  $^1\text{H}$ NMR spectroscopy. Stereochemical ratios were determined in comparison with authentic racemic material prepared using either triphenylphosphine or triphenylphosphite as the achiral ligand in the conjugate allylation reaction. Absolute stereochemistry was determined by subjecting the conjugate allylation product to ring closing metathesis conditions using the Hoveyda-Grubbs second generation catalyst, in  $\text{CH}_2\text{Cl}_2$ , to afford 5-phenyl-2-cyclohexen-1-one (Sieber, J. D.; Liu, S.; Morken, J. P. *J. Am. Chem. Soc.* **2007**, *129*, 2214.). The optical rotation was measured ( $[\alpha]_D^{20} = +45^\circ$  ( $c = 0.25$ ,  $\text{CHCl}_3$ )) and compared to the known literature value (Hareau, G. P.-J.; Koiwa, M.; Hikichi, S.; Sato, F. *J. Am. Chem. Soc.* **1999**, *121*, 3640).

$^1\text{H}$  NMR analysis of the crude reaction mixture (400 MHz,  $\text{CDCl}_3$ ):

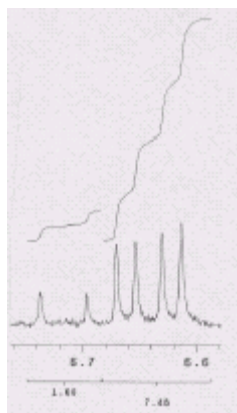

Chiral SFC (AS-H, Chiralpak, 150 bar, 50°C, flow = 0.5 mL/min, 1.0 % MeOH) analysis of conjugate allylation product:

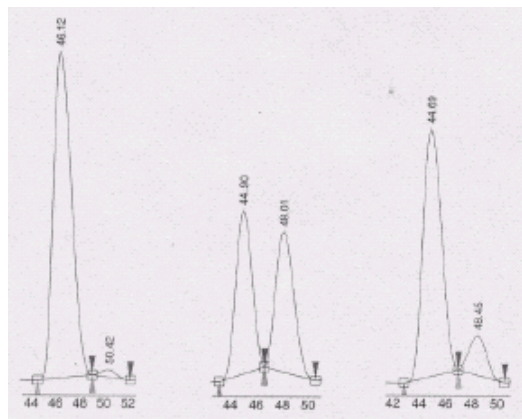

| Index | Name    | Start Time [Min] | Time [Min] | End Time [Min] | RT Offset [Min] | Quantity [% Area] | Height [µV] | Area [µV Min] | Area [%] |
|-------|---------|------------------|------------|----------------|-----------------|-------------------|-------------|---------------|----------|
| 1     | UNKNOWN | 44.60            | 46.12      | 49.01          | 0.00            | 98.22             | 14573.0     | 25049.8       | 98.215   |
| 2     | UNKNOWN | 49.04            | 50.42      | 52.18          | 0.00            | 1.78              | 319.2       | 455.2         | 1.785    |
| Total |         |                  |            |                |                 | 100.00            | 14892.2     | 25505.0       | 100.000  |

Allylation product

Racemic

Allylation product + racemic coinjection



## Procedure for ring-closing methathesis (Scheme 2, eq 1):

**(S)-5-(5-fluoro-2-methylphenyl)cyclohex-2-enone.** To 237 mg (0.759 mmol) of (*S,E*)-4-(5-fluoro-2-methylphenyl)trideca-1,7-dien-6-one in a 20 mL scintillation vial with magnetic stir-bar, in a glove-box under an Ar atmosphere, was added a solution of 9.8 mg (0.0157 mmol) of the Hoveyda-Grubbs second generation catalyst in 16 mL of CH<sub>2</sub>Cl<sub>2</sub>. The vial was capped, taped, removed from the glove-box, and stirred at ambient temperature for 1 h. Next, 0.15 mL of *t*-butyl vinyl ether was added and stirring was continued for another 30 min. The reaction was concentrated using reduced pressure and purified using column chromatography (SiO<sub>2</sub>, pentane:Et<sub>2</sub>O) to afford 155 mg (97%) of the title compound as a colorless oil.  $R_f = 0.14$  (SiO<sub>2</sub>, 7:1 pentane:Et<sub>2</sub>O); IR (neat): 3031 (m), 2930 (m), 1879 (w), 1678 (s), 1615 (m), 1584 (m), 1495 (s), 1388 (s), 1243 (s), 1161 (m) cm<sup>-1</sup>; <sup>1</sup>H NMR (CDCl<sub>3</sub>):  $\delta$  7.09 (1H, dd,  $J = 8.4$  Hz,  $J = 6.0$  Hz), 6.99-7.07 (1H, m), 6.91 (1H, dd,  $J = 10$  Hz,  $J = 2.8$  Hz), 6.81 (1H, dt,  $J = 8.0$  Hz,  $J = 2.8$  Hz), 6.01 (1H, dd,  $J = 11$  Hz,  $J = 2.8$  Hz), 3.45-3.58 (1H, m), 2.38-2.62 (4H, m); <sup>13</sup>C NMR (CDCl<sub>3</sub>):  $\delta$  198.6, 161.4 (d,  $^1J_{CF} = 242$  Hz), 149.2, 143.0 (d,  $^3J_{CF} = 6.2$  Hz), 131.9 (d,  $^3J_{CF} = 7.8$  Hz), 130.6, 129.6, 113.2 (d,  $^2J_{CF} = 21$  Hz), 112.3 (d,  $^2J_{CF} = 21$  Hz), 44.16, 36.85, 32.48, 18.50; <sup>19</sup>F NMR:  $\delta$  95.10 (m). LRMS (APPI) Calc'd for C<sub>13</sub>H<sub>13</sub>FO (M + H)<sup>+</sup>: 205.1 Found (M + H)<sup>+</sup>: 205.1.

## Procedure for Baeyer-Villiger/saponification (Scheme 2, eq 2):

**1. Oxidation:** For lead reference, see: Göttlich, R.; Yamakoshi, K.; Sasai, H.; Shibasaki, M. *Synlett* **1997**, 971. In a 2-dram vial with magnetic stir bar in a dry-box under Ar was weighed ~45 mg of crushed 4 Å molecular sieves. Next, 48.8  $\mu$ L (0.049 mmol) of a 1.0 M solution of ( $\pm$ )-*trans*-1,2-diaminocyclohexane in CH<sub>2</sub>Cl<sub>2</sub> was added by syringe followed by dilution with 0.43 mL of CH<sub>2</sub>Cl<sub>2</sub>. Next, 48.8  $\mu$ L (0.049 mmol) of a 1.0 M solution of SnCl<sub>4</sub> in CH<sub>2</sub>Cl<sub>2</sub> was added and the vial was capped with a septum, removed from the dry-box and cooled to 0 °C (ice/brine). TMS<sub>2</sub>O<sub>2</sub> was added dropwise as a 1.0 M solution in CH<sub>2</sub>Cl<sub>2</sub> (0.39 mL, 0.39 mmol). After stirring for 10 min at this temperature, 52.8 mg (0.195 mmol) of (*S,E*)-4-phenyltrideca-1,7-dien-6-one was added in 0.85 mL CH<sub>2</sub>Cl<sub>2</sub> via canula. The reaction was subsequently warmed to room temperature and stirred for 15 h. Sodium sulfite (60 mg) was then added, and the reaction stirred for an additional 3 h. Finally, the reaction was filtered through a pad of silica gel using EtOAc and concentrated under reduced pressure. Silica gel chromatography (hexanes/EtOAc) of the crude material afforded 37.8 mg (68 %) of (*S,E*)-hept-1-enyl-3-phenylhex-5-enoate as a colorless oil along with 13.8 mg of unreacted starting material.  $R_f = 0.30$  (30:1 Hexanes:EtOAc); IR (neat): 3080 (m), 3029 (m), 2958 (s), 2928 (s), 2856 (s), 1945 (w), 1750 (s), 1675 (m), 1447 (m), 1236 (m), 1160 (s) cm<sup>-1</sup>; <sup>1</sup>H NMR (CDCl<sub>3</sub>):  $\delta$  7.25-7.32 (2H, m), 7.15-7.23 (3H, m), 6.95 (1H, dt,  $J = 12$  Hz,  $J = 2$  Hz), 5.64 (1H, ddt,  $J = 17$  Hz,  $J = 10$  Hz,  $J = 7.2$  Hz), 5.33 (1H, dt,  $J = 12$  Hz,  $J = 7.2$  Hz), 4.91-5.05 (2H, m), 3.22 (1H, p,  $J = 7.6$  Hz), 2.74 (1H, dd,  $J = 16$  Hz,  $J = 6.8$  Hz), 2.61 (1H, dd,  $J = 16$  Hz,  $J = 8.4$  Hz), 2.32-2.48 (2H, m), 1.93 (2H, q,  $J = 6.8$  Hz), 1.17-1.39 (6H, m), 0.87 (3H, t,  $J = 7.2$  Hz); <sup>13</sup>C NMR (CDCl<sub>3</sub>):  $\delta$  169.5, 143.3, 135.7, 135.2, 128.4, 127.3, 126.6, 117.0, 115.1, 41.55, 40.55, 40.28, 31.24, 27.16, 27.21, 22.45, 14.02. LRMS (ESI+) Calc'd for C<sub>19</sub>H<sub>26</sub>O<sub>2</sub> (M + H)<sup>+</sup>: 287.2 Found (M + H)<sup>+</sup>: 287.1.  $[\alpha]_D^{20} = +15^\circ$  ( $c = 3.0$ , CHCl<sub>3</sub>).

**2. Saponification:** To a solution of 27.4 mg (0.0957 mmol) of (*S,E*)-hept-1-enyl-3-phenylhex-5-enoate in 0.96 mL of a 3:1 THF:H<sub>2</sub>O mixture at 0 °C was added LiOH•H<sub>2</sub>O (8.0 mg, 0.19 mmol). The reaction was allowed to reach ambient temperature and stirring was continued for 20h. The reaction was acidified with 1 M HCl and extracted with EtOAc (3x). The organic layers were combined, washed with brine, and dried over anhydrous Na<sub>2</sub>SO<sub>4</sub>. Volatiles were removed under reduced pressure, and the product was purified using silica gel chromatography (1% AcOH in CH<sub>2</sub>Cl<sub>2</sub>/Et<sub>2</sub>O,  $R_f = 0.25$  in 1% AcOH in 20:1 CH<sub>2</sub>Cl<sub>2</sub>:Et<sub>2</sub>O) to give 17.9 mg (98%) of 3-phenyl-hex-5-enoic acid after removal of AcOH by azeotropic distillation with toluene using a rotary evaporator followed by removal of toluene via azeotropic distillation with CH<sub>2</sub>Cl<sub>2</sub>. Spectral data was

consistent with the literature (Allin, S. M.; Essat, M.; Pita, C. H.; Baird, R. D.; McKee, V.; Elsegood, M.; Edgar, M.; Andrews, D. M.; Shah, P.; Aspinall, I. *Org. Biomol. Chem.* **2005**, *3*, 809.).

### Conjugate allylation procedure using substrate **17** (Scheme 4):

#### Synthesis of **17**:

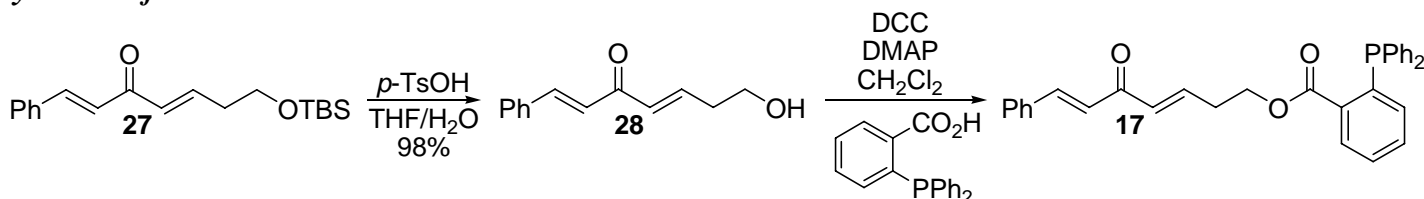

To a solution of 763 mg (2.41 mmol) of (1*E*, 4*E*)-7-(*t*-butyldimethylsilyloxy)-1-phenylhepta-1,4-dien-3-one, **27**, (prepared according to: Sieber, J. D.; Liu, S.; Morken, J. P. *J. Am. Chem. Soc.* **2007**, *129*, 2214.) in 12 mL of 3:1 THF:H<sub>2</sub>O was added 458 mg (2.41 mmol) of *p*-toluenesulfonic acid monohydrate under a N<sub>2</sub> atmosphere. The starting material was consumed after 1h as evident by TLC analysis. H<sub>2</sub>O was then added, followed by extraction with Et<sub>2</sub>O. The combined organics were dried with anhydrous Na<sub>2</sub>SO<sub>4</sub> and concentrated using reduced pressure. Silica gel chromatography (hexanes/EtOAc) of the crude material afforded 479 mg (98%) of **28** as a yellow oil. *R*<sub>f</sub> = 0.30 (SiO<sub>2</sub>, 1:2 hexanes:EtOAc); IR (neat): 3415 (s, br), 3058 (w), 2939 (m), 2878 (m), 1958 (w), 1659 (s), 1628 (s), 1598 (s), 1494 (m), 1449 (m), 1333 (s), 1308 (m) cm<sup>-1</sup>; <sup>1</sup>H NMR (CDCl<sub>3</sub>): δ 7.61 (1H, d, *J* = 16 Hz), 7.48-7.54 (2H, m), 7.31-7.37 (3H, m), 6.98 (1H, dt, *J* = 16 Hz, *J* = 7.0 Hz), 6.93 (1H, d, *J* = 16 Hz), 6.50 (1H, dt, *J* = 16 Hz, *J* = 1.6 Hz), 3.78 (2H, t, *J* = 6.2 Hz), 2.62-2.92 (1H, br s), 2.51 (2H, dq, *J* = 7.0 Hz, *J* = 1.6 Hz); <sup>13</sup>C NMR (CDCl<sub>3</sub>): δ 189.1, 144.4, 143.4, 134.5, 130.9, 130.4, 128.8, 128.2, 124.5, 60.84, 35.87. LRMS (ES<sup>+</sup>) Calc'd for C<sub>13</sub>H<sub>14</sub>O<sub>2</sub> (M + H)<sup>+</sup>: 203.1 Found (M + H)<sup>+</sup>: 203.1.

To 200 mg (0.968 mmol) of **28** in 1.9 mL of CH<sub>2</sub>Cl<sub>2</sub> was added 386 mg (1.26 mmol) of *o*-diphenylphosphinobenzoic acid, 260 mg (1.26 mmol) of *N,N'*-dicyclohexylcarbodiimide (DCC), and 11.9 mg (0.0968 mmol) of 4-dimethylaminopyridine (DMAP) sequentially under N<sub>2</sub>. This mixture was then allowed to stir at ambient temperature for 2h, and the reaction was then filtered through celite using CH<sub>2</sub>Cl<sub>2</sub>. Volatiles were removed under reduced pressure and the resultant oil purified by silica gel chromatography (hexanes/EtOAc) to afford 348 mg (73%) of **17** as a light-yellow solid. mp 140-145 °C. *R*<sub>f</sub> = 0.20 (SiO<sub>2</sub>, 4:1 hexanes:EtOAc); IR (CH<sub>2</sub>Cl<sub>2</sub> solution): 3411 (br, m), 3058 (m), 2957 (m), 1967 (w), 1891 (w), 1717 (s), 1662 (s), 1628 (s), 1601 (s), 1433 (s), 1339 (m), 1275 (s), 1189 (s), 1122 (s) cm<sup>-1</sup>; <sup>1</sup>H NMR (CDCl<sub>3</sub>): δ 8.00-8.07 (1H, m), 7.63 (1H, d, *J* = 16 Hz), 7.51-7.59 (2H, m), 7.20-7.42 (16H, m), 6.96 (1H, d, *J* = 16 Hz), 6.89 (1H, dt, *J* = 16 Hz, *J* = 6.8 Hz), 6.46 (1H, d, *J* = 16 Hz), 4.32 (2H, t, *J* = 6.4 Hz), 2.55 (2H, q, *J* = 6.4 Hz); <sup>1</sup>H NMR (C<sub>6</sub>D<sub>6</sub>): δ 8.04-8.10 (1H, m), 7.70 (1H, d, *J* = 16 Hz), 7.32-7.46 (4H, m), 6.85-7.25 (14H, m), 6.81 (1H, d, *J* = 16 Hz), 6.73 (1H, dt, *J* = 16 Hz, *J* = 6.8 Hz), 6.16 (1H, d, *J* = 16 Hz), 3.94 (2H, t, *J* = 6.4 Hz), 2.00 (2H, q, *J* = 6.4 Hz); <sup>13</sup>C NMR (CDCl<sub>3</sub>): δ 188.7, 166.6, 143.3, 142.6, 140.3, 140.1, 137.8, 137.7, 134.7, 134.3, 133.9, 133.7, 132.0, 131.0, 130.6, 130.4, 128.8, 128.6, 128.5, 128.4, 128.3, 124.7, 63.11, 31.74. <sup>13</sup>C NMR (C<sub>6</sub>D<sub>6</sub>): δ 187.9, 167.0, 143.1, 142.5, 139.3, 139.2, 138.8, 135.2, 134.8, 134.6, 132.4, 131.9, 131.3, 130.5, 129.3, 129.1, 128.9, 128.8, 125.8, 63.67, 32.22. <sup>31</sup>P NMR (C<sub>6</sub>D<sub>6</sub>): δ -2.86. LRMS (ESI<sup>+</sup>) Calc'd for C<sub>32</sub>H<sub>27</sub>O<sub>3</sub>P (M + H)<sup>+</sup>: 491.2 Found (M + H)<sup>+</sup>: 491.1.

### Conjugate Allylation of **17**:

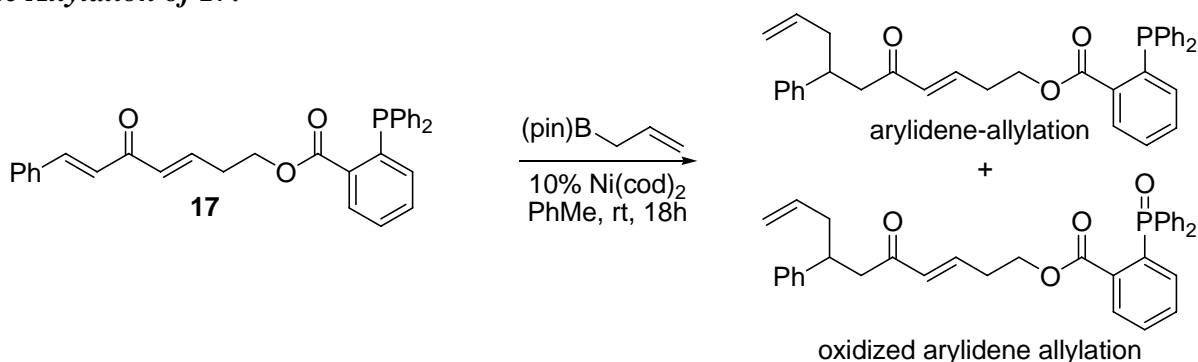

A 2-dram vial with magnetic stir-bar was charged with 2.2 mg (0.0082 mmol) of bis(1,5-cyclooctadiene)nickel and 40.0 mg (0.0815 mmol) of **17** in a dry-box. Toluene (0.41 mL) was then added followed by 16.4 mg (0.0978 mmol) of allylboronic acid pinacol ester. The vial was capped, sealed with electrical tape, removed from the dry-box, and stirred at ambient temperature for 18h. The reaction was quenched with the addition of 2 drops (18 Ga needle) of MeOH and subsequently concentrated under reduced pressure. Chemoselectivity was determined by <sup>1</sup>H NMR analysis of the crude mixture. Purification by flash chromatography (SiO<sub>2</sub>, hexanes/EtOAc) afforded 17.1 mg of the conjugate allylation product along with 9.3 mg of oxidized material (combined yield = 60%). R<sub>f</sub>(phosphine) = 0.17 (SiO<sub>2</sub>, 6:1 hexanes:EtOAc); R<sub>f</sub>(phosphine oxide) = 0.17 (SiO<sub>2</sub>, 1:3 hexanes:EtOAc); IR (CH<sub>2</sub>Cl<sub>2</sub> solution, phosphine): 3400 (br w), 3067 (m), 2919 (m), 28528 (m), 1953 (w), 1716 (s), 1670 (s), 1632 (m), 1429 (s), 1265 (s), 1243 (s), 1138 (s), 1113 (s) cm<sup>-1</sup>; IR (CH<sub>2</sub>Cl<sub>2</sub> solution, phosphine oxide): 3422 (br m), 3058 (m), 2928 (m), 2856 (m), 1966 (w), 1733 (s), 1661 (s), 1628 (m), 1433 (s), 1281 (s), 1256 (s), 1197 (s), 1121 (s) cm<sup>-1</sup>; <sup>1</sup>H NMR (CDCl<sub>3</sub>, phosphine): δ 7.95-8.02 (1H, m), 7.31-7.41 (2H, m), 7.26-7.31 (6H, m), 7.19-7.26 (6H, m), 7.10-7.18 (3H, m), 6.88-6.94 (1H, m), 6.63 (1H, dt, *J* = 16 Hz, *J* = 6.8 Hz), 6.01 (1H, d, *J* = 16 Hz), 5.61 (1H, ddt, *J* = 17 Hz, *J* = 10 Hz, *J* = 6.8 Hz), 4.88-4.99 (2H, m), 4.20 (2H, t, *J* = 6.4 Hz), 3.27 (1H, p, *J* = 7.2 Hz), 2.82 (2H, app d, *J* = 7.6 Hz), 2.40 (2H, q, *J* = 6.8 Hz), 2.36 (2H, t, *J* = 6.8 Hz); <sup>1</sup>H NMR (CDCl<sub>3</sub>, phosphine oxide): δ 7.80-7.88 (1H, m), 7.52-7.68 (5H, m), 7.30-7.52 (8H, m), 7.10-7.29 (5H, m), 6.51 (1H, dt, *J* = 16 Hz, *J* = 6.8 Hz), 5.89 (1H, d, *J* = 16 Hz), 5.61 (1H, ddt, *J* = 17 Hz, *J* = 10 Hz, *J* = 7.2 Hz), 4.88-4.98 (2H, m), 4.00 (2H, t, *J* = 6.8 Hz), 3.26 (1H, p, *J* = 7.2 Hz), 2.74-2.86 (2H, m), 2.35 (2H, t, *J* = 7.2 Hz), 2.20 (2H, q, *J* = 6.8 Hz); <sup>13</sup>C NMR (CDCl<sub>3</sub>, phosphine): δ 198.6, 166.6, 144.1, 142.1, 140.4, 140.1, 137.8, 137.7, 136.1, 134.3, 133.9, 133.7, 132.3, 132.0, 130.6, 128.6, 128.5, 128.4, 128.3, 128.2, 127.5, 126.3, 63.03, 46.20, 40.96, 40.63, 31.53. <sup>31</sup>P NMR (CDCl<sub>3</sub>): δ -3.10 (phosphine), 32.72 (phosphine oxide). LRMS (ESI+) Calc'd for C<sub>35</sub>H<sub>33</sub>O<sub>3</sub>P (M + H)<sup>+</sup>: 533.2 Found (M + H)<sup>+</sup>: 533.1. LRMS (ESI+) Calc'd for C<sub>35</sub>H<sub>33</sub>O<sub>4</sub>P (M + H)<sup>+</sup>: 549.2 Found (M + H)<sup>+</sup>: 549.1.

### Synthesis and Conjugate Allylation of **18**:

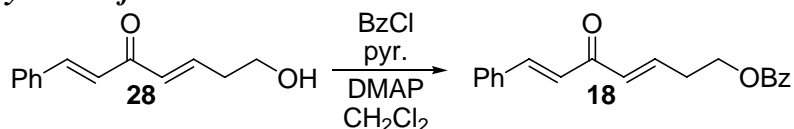

To a solution of 96.7 mg (0.478 mmol) of **28** in 1.9 mL of  $\text{CH}_2\text{Cl}_2$  at  $0^\circ\text{C}$  was added 0.10 mL of pyridine, 12 mg of DMAP, and 0.14 mL of benzoyl chloride, sequentially. Reaction progress was monitored by TLC, and after 1h at  $0^\circ\text{C}$ , 0.05 mL of pyridine and 0.07 mL of benzoyl chloride was added. After an additional 30 min at  $0^\circ\text{C}$ , starting material had been consumed as evident by TLC. Saturated  $\text{NaHCO}_3$  was added, and the aqueous layer extracted with  $\text{Et}_2\text{O}$  (1x). The organic layer was washed with 1M HCl (2x) and dried with anhydrous  $\text{Na}_2\text{SO}_4$ . After removal of volatiles under reduced pressure, the crude material was purified by silica gel chromatography (hexanes/ $\text{EtOAc}$ ) to afford 124 mg (86%) of **18** as an off-white solid. mp  $60\text{-}66^\circ\text{C}$ .  $R_f = 0.13$  ( $\text{SiO}_2$ , 6:1 hexanes: $\text{EtOAc}$ ); IR ( $\text{CH}_2\text{Cl}_2$  solution): 3054 (m), 3025 (m), 2919 (m), 2848 (m), 1720 (s), 1661 (s), 1602 (s), 1450 (m), 1273 (s), 1188 (m)  $\text{cm}^{-1}$ ;  $^1\text{H NMR}$  ( $\text{CDCl}_3$ ):  $\delta$  7.96-8.06 (1H, m), 7.63 (1H, d,  $J = 16$  Hz), 7.49-7.59 (3H, m), 7.33-7.47 (5H, m), 7.02 (1H, dt,  $J = 16$  Hz,  $J = 6.8$  Hz), 6.94 (1H, d,  $J = 16$  Hz), 6.57 (1H, d,  $J = 16$  Hz), 4.48 (2H, t,  $J = 6.4$  Hz), 2.75 (2H, q,  $J = 6.4$  Hz);  $^{13}\text{C NMR}$  ( $\text{CDCl}_3$ ):  $\delta$  188.7, 166.3, 143.5, 142.6, 134.6, 133.0, 131.0, 130.4, 129.9, 129.5, 128.9, 128.35, 128.26, 124.8, 62.84, 32.03. LRMS (ES+) Calc'd for  $\text{C}_{20}\text{H}_{18}\text{O}_3$  ( $\text{M} + \text{H}$ ) $^+$ : 307.1 Found ( $\text{M} + \text{H}$ ) $^+$ : 307.1.

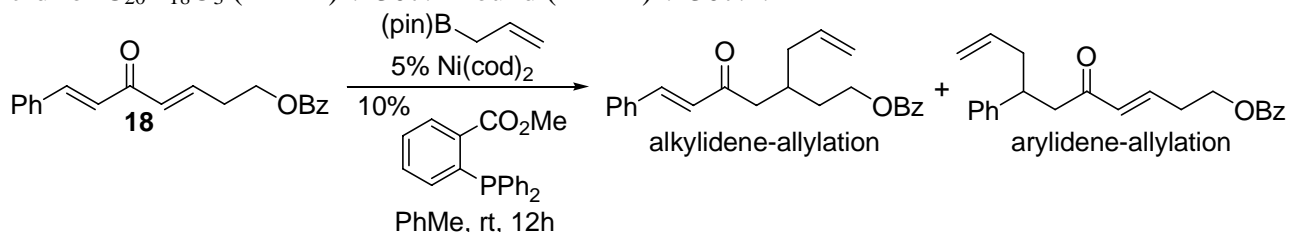

A dried vial with a stir-bar was charged with 2.0 mg (0.0074 mmol) of bis(1,5-cyclooctadiene)nickel, 4.7 mg (0.015 mmol) of ligand, and 0.98 mL of toluene under argon. To this solution was added 29.6 mg (0.176 mmol) of allylB(pin) and 45.0 mg (0.147 mmol) of **18**. The vial was sealed, removed from the dry-box, and allowed to stir at ambient for 12 h. After this time period, degassed water ( $\text{N}_2$  sparge) was added and the mixture transferred to a separatory funnel with  $\text{CH}_2\text{Cl}_2$ . The organic layer was collected and the aqueous layer washed with  $\text{CH}_2\text{Cl}_2$  (2x). The combined organic layers were dried with  $\text{Na}_2\text{SO}_4$ , and volatiles removed in vacuo. Chemoselectivity was determined by  $^1\text{H NMR}$  analysis of the crude mixture. Chromatography (hexanes/ $\text{EtOAc}$ ) afforded 38.4 mg (75%) of the conjugate allylation product. Alkylidene allylation product:  $R_f = 0.23$  ( $\text{SiO}_2$ , 6:1 hexanes: $\text{EtOAc}$ ); IR ( $\text{CH}_2\text{Cl}_2$  solution): 3067 (m), 2915 (m), 2852 (m), 1961 (w), 1716 (s), 1666 (s), 1610 (s), 1450 (m), 1272 (s), 1117 (m)  $\text{cm}^{-1}$ ;  $^1\text{H NMR}$  ( $\text{CDCl}_3$ ):  $\delta$  8.01 (2H, d,  $J = 8$  Hz), 7.28-7.61 (9H, m), 6.72 (1H, d,  $J = 16$  Hz), 5.79 (1H, ddt,  $J = 17$  Hz,  $J = 10$  Hz,  $J = 7.2$  Hz), 5.00-5.12 (2H, m), 4.30-4.45 (2H, m), 2.71 (1H, dd,  $J = 16$  Hz,  $J = 6.8$  Hz), 2.66 (1H, dd,  $J = 16$  Hz,  $J = 6.8$  Hz), 2.37 (1H, h,  $J = 6.4$  Hz), 2.09-2.29 (2H, m), 1.72-1.92 (2H, m);  $^{13}\text{C NMR}$  ( $\text{CDCl}_3$ ):  $\delta$  199.3, 166.5, 142.5, 135.8, 134.4, 132.8, 130.4, 130.2, 129.5, 128.8, 128.3, 128.2, 126.3, 117.3, 63.00, 44.88, 38.26, 32.58, 31.23. LRMS (ESI+) Calc'd for  $\text{C}_{23}\text{H}_{24}\text{O}_3$  ( $\text{M} + \text{H}$ ) $^+$ : 349.2 Found ( $\text{M} + \text{H}$ ) $^+$ : 349.1. Arylidene allylation product:  $R_f = 0.17$  ( $\text{SiO}_2$ , 6:1 hexanes: $\text{EtOAc}$ ); IR ( $\text{CH}_2\text{Cl}_2$  solution): 3071 (m), 3025 (m), 2919 (m), 2851 (m), 1720 (s), 1673 (s), 1636 (s), 1454 (m), 1272 (s), 1104 (m)  $\text{cm}^{-1}$ ;  $^1\text{H NMR}$  ( $\text{CDCl}_3$ ):  $\delta$  7.96-8.04 (2H, m), 7.52-7.58 (1H, m), 7.38-7.46 (2H, m), 7.18-7.27 (2H, m), 7.10-7.18 (3H, m), 6.74 (1H, dt,  $J = 16$  Hz,  $J = 6.8$  Hz), 6.12 (1H, dt,  $J = 16$  Hz,  $J = 2$  Hz), 5.61 (1H, ddt,  $J = 17$  Hz,  $J = 10$  Hz,  $J = 6.8$  Hz), 4.86-5.00 (2H, m), 4.37 (2H, t,  $J = 6.4$  Hz), 3.27 (1H, p,  $J = 7.2$  Hz), 2.85 (1H, dd,  $J = 17$  Hz,  $J = 6.4$  Hz), 2.82 (1H, dd,  $J = 17$  Hz,  $J = 7.6$  Hz), 2.61 (2H, q,  $J = 6.8$  Hz), 2.36 (2H, t,  $J = 7.2$  Hz);  $^{13}\text{C NMR}$  ( $\text{CDCl}_3$ ):  $\delta$  198.6, 166.2, 144.0, 141.9, 136.1, 133.0, 132.4, 129.9, 129.5,

128.34, 128.32, 127.4, 126.3, 116.7, 62.71, 46.31, 41.00, 40.62, 31.80. LRMS (ESI+) Calc'd for C<sub>23</sub>H<sub>24</sub>O<sub>3</sub> (M + H)<sup>+</sup>: 349.2 Found (M + H)<sup>+</sup>: 349.1.

### Synthesis and characterization of the Ni-enone complex (Scheme 5):

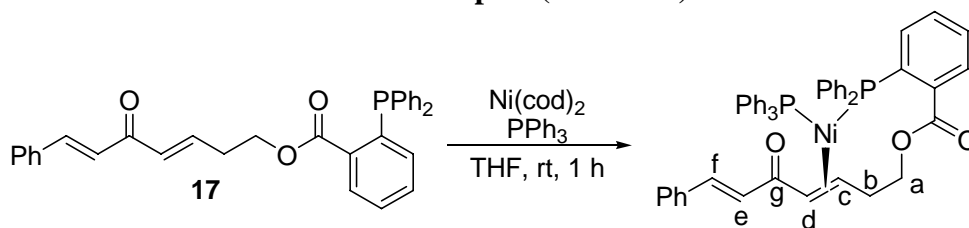

An oven dried 20 mL vial with magnetic stir-bar was charged with 27.5 mg (0.0999 mmol) of bis(1,5-cyclooctadiene)nickel, 49.0 mg (0.0999 mmol) of **17** and 1.0 mL of THF in a dry-box. After stirring for 5 min, a deep purple solution was formed, to which was then added 26.2 mg (0.0999 mmol) of triphenylphosphine. This mixture was then stirred for an additional 1 h providing a deep red solution. Volatile material was removed using reduced pressure in the dry-box. The residue was then triturated with degassed pentane (3x) and dried under vacuum to afford 88.1 mg of a deep red solid. mp 152-172 °C (sealed capillary, decomp.). <sup>1</sup>H NMR (C<sub>6</sub>D<sub>6</sub>): δ 7.89 (1H, t, *J* = 8.5 Hz), 7.73 (1H, d, *J* = 16 Hz, H<sub>f</sub>), 7.34-7.60 (8H, m), 7.33 (2H, t, *J* = 8.5 Hz), 6.78-7.11 (27H, m), 6.71 (1H, t, *J* = 7.0 Hz), 6.64 (1H, t, *J* = 7.5 Hz), 5.80 (1H, d, *J* = 16 Hz, H<sub>e</sub>), 4.66 (1H, br t, H<sub>a</sub>), 3.80 (1H, m, H<sub>c</sub>), 3.71 (1H, m, H<sub>d</sub>), 3.50 (1H, d, *J* = 11 Hz, H<sub>a'</sub>), 1.15-1.32 (2H, m, H<sub>b</sub>); <sup>13</sup>C NMR (C<sub>6</sub>D<sub>6</sub>), diagnostic peaks: δ 187.8 (C<sub>g</sub>), 168.1, 137.21 (C<sub>f</sub>), 130.65 (C<sub>e</sub>), 71.15 (C<sub>d</sub>, d, <sup>2</sup>*J*<sub>CP</sub> = 11 Hz), 62.52 (C<sub>a</sub>), 54.23 (C<sub>c</sub>, d, <sup>2</sup>*J*<sub>CP</sub> = 20 Hz), 27.98 (C<sub>b</sub>). Note that the aromatic region was too complex for further assignment. <sup>31</sup>P NMR (C<sub>6</sub>D<sub>6</sub>): δ 41.21 (d, <sup>2</sup>*J*<sub>PP</sub> = 32 Hz), 28.59 (d, <sup>2</sup>*J*<sub>PP</sub> = 32 Hz).

$^1\text{H}$  and  $^{13}\text{C}$  NMR in  $\text{C}_6\text{D}_6$ :

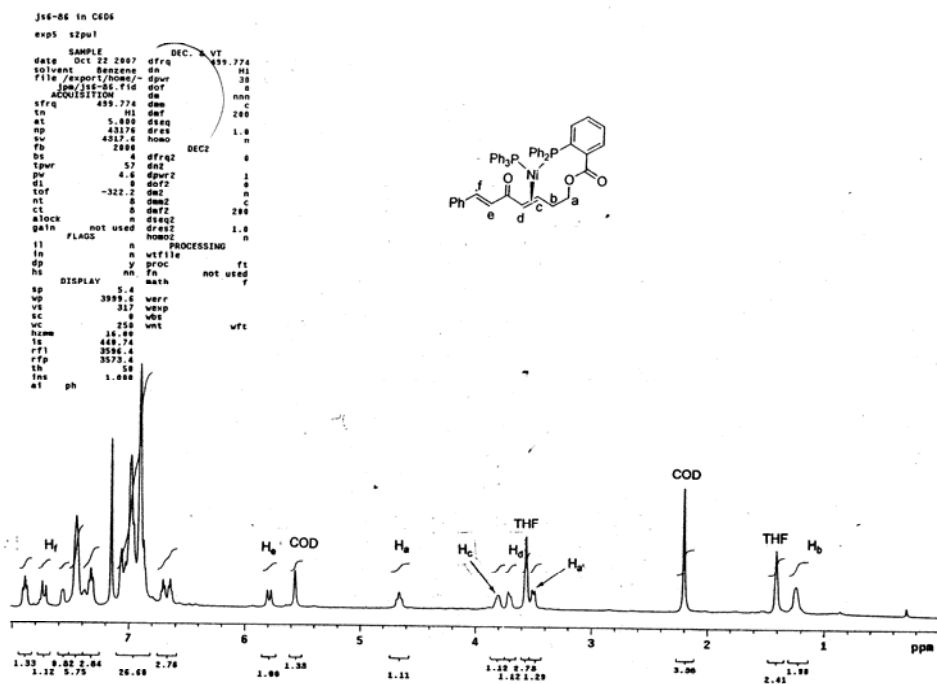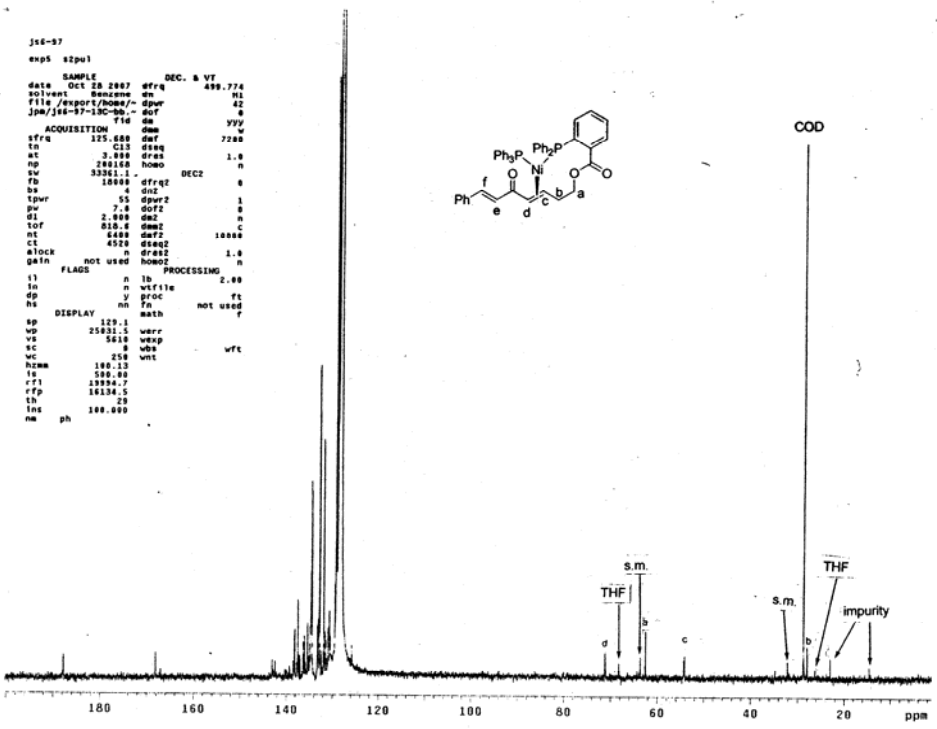

COSY in C<sub>6</sub>D<sub>6</sub>:

jst-84-gCOSY 1a C6D6  
 Pulse Sequence: gCOSY  
 Solvent: Benzene  
 Ambient Temperature  
 File: jst-84gCOSY  
 INOVA-500 "mars"  
 Relax. delay 1.800 sec  
 Acq. time 8.237 sec  
 Width 4317.6 Hz  
 ZD Width 4317.6 Hz  
 IS repetitions  
 SI2 increments  
 OBSERVE F1 499.7714819 MHz  
 DATA PROCESSING  
 Sc. sine bell 0.119 sec  
 F1 DATA PROCESSING  
 Sc. sine bell 0.439 sec  
 FT size 8192 x 8192  
 Total time 2 hr, 59 min, 6 sec

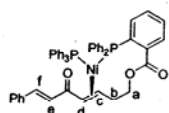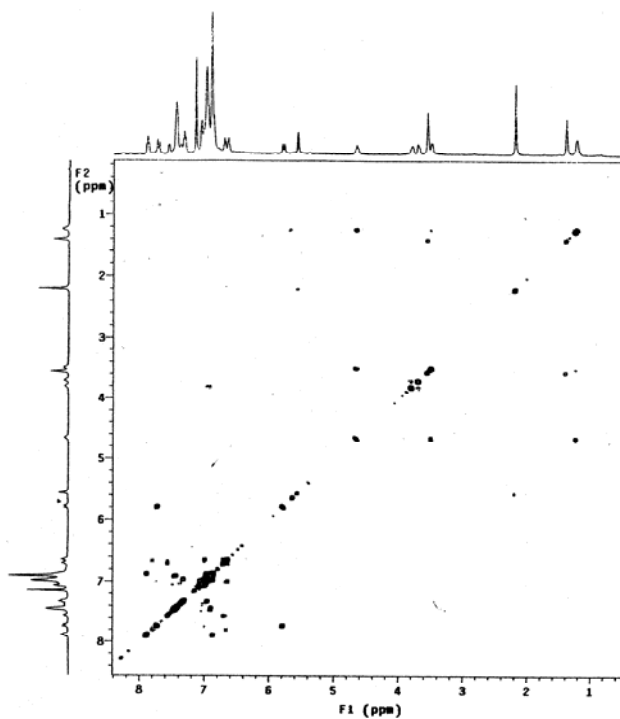

jst-85-gCOSY in C6D6  
 Pulse Sequence: gCOSY  
 Solvent: Benzene  
 Ambient Temperature  
 INOVA-500 "mars"  
 Relax. delay 1.800 sec  
 Acq. time 8.237 sec  
 Width 4317.6 Hz  
 ZD Width 4317.6 Hz  
 IS repetitions  
 SI2 increments  
 OBSERVE F1 499.7714819 MHz  
 DATA PROCESSING  
 Sc. sine bell 0.119 sec  
 F1 DATA PROCESSING  
 Sc. sine bell 0.439 sec  
 FT size 2848 x 2848  
 Total time 2 hr, 59 min, 6 sec

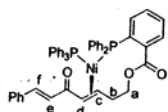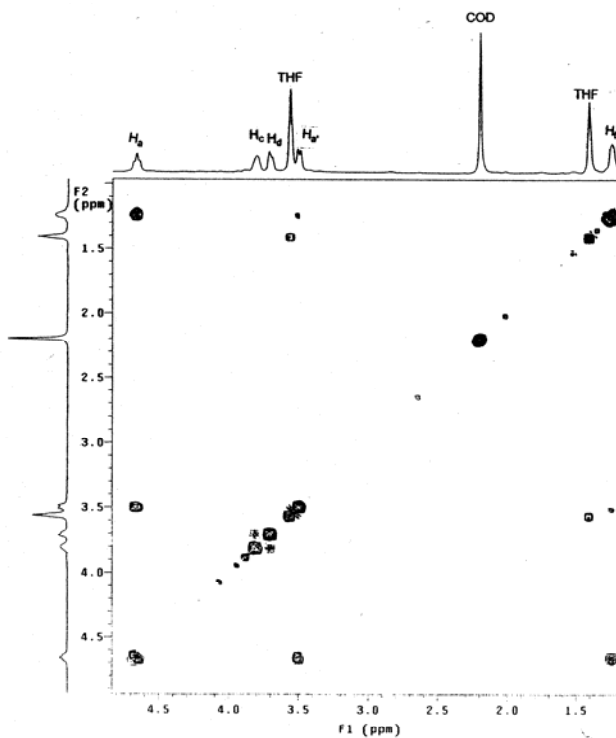

HSQC in C<sub>6</sub>D<sub>6</sub>:

js6-97  
Pulse Sequence: gHSQC  
Solvent: Benzene  
Ambient temperature  
User: 1-12-87  
File: js6-97gHSQC-rp  
INOVA-500 "nars"

Relax. delay 1.000 sec  
Acq. time 8.180 sec  
Width 4197.9 Hz  
SD Width 22767.9 Hz  
64 repetitions  
2 x 256 increments  
OBSERVE H1, 499.7714951 MHz  
DECOUPLE C13, 125.6086637 MHz  
Power 44.68  
on during acquisition  
off during delay  
GARP-1 modulated  
DATA PROCESSING  
Gauss apodization 0.003 sec  
F1 DATA PROCESSING  
Gauss apodization 0.011 sec  
FT size 8192 x 4896  
Total time 11 hr, 25 min, 47 sec

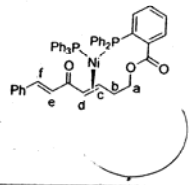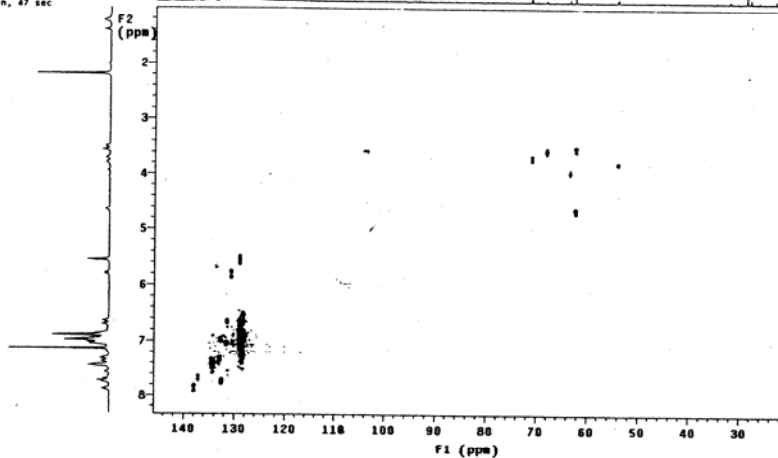

js6-97  
Pulse Sequence: gHSQC  
Solvent: Benzene  
Ambient temperature  
User: 1-12-87  
File: js6-97gHSQC-rp  
INOVA-500 "nars"

Relax. delay 1.000 sec  
Acq. time 8.180 sec  
Width 4197.9 Hz  
SD Width 22767.9 Hz  
64 repetitions  
2 x 256 increments  
OBSERVE H1, 499.7714951 MHz  
DECOUPLE C13, 125.6086637 MHz  
Power 44.68  
on during acquisition  
off during delay  
GARP-1 modulated  
DATA PROCESSING  
Gauss apodization 0.003 sec  
F1 DATA PROCESSING  
Gauss apodization 0.011 sec  
FT size 8192 x 4896  
Total time 11 hr, 25 min, 47 sec

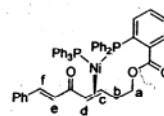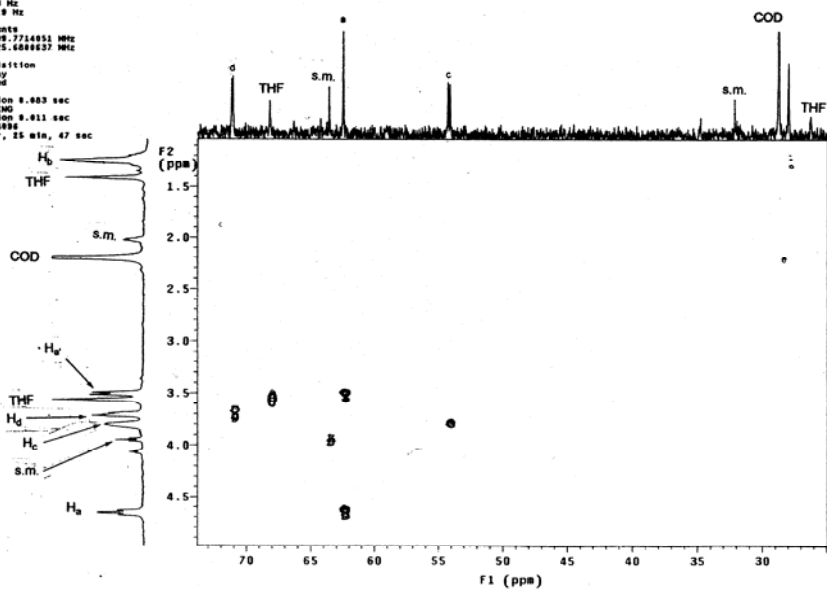



NOESY in C<sub>6</sub>D<sub>6</sub>:

J66-127  
 Pulse Sequence: NOESY  
 Solvent: Benzene  
 Ambient Temperature  
 INOVA-500 "mr3"  
 Relax. delay 1.800 sec  
 Mixing 0.500 sec  
 ACS. Time 0.200 sec  
 Width 4455.6 Hz  
 2D Width 4455.6 Hz  
 16 repetitions  
 2 x 256 increments  
 OBSERVE H1, 499.7714922 MHz  
 DATA PROCESSING  
 Gauss apodization 0.100 sec  
 F1 DATA PROCESSING  
 Gauss apodization 0.041 sec  
 FT size 2048 x 2048  
 Total time 4 hr, 2 min, 53 sec

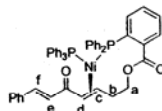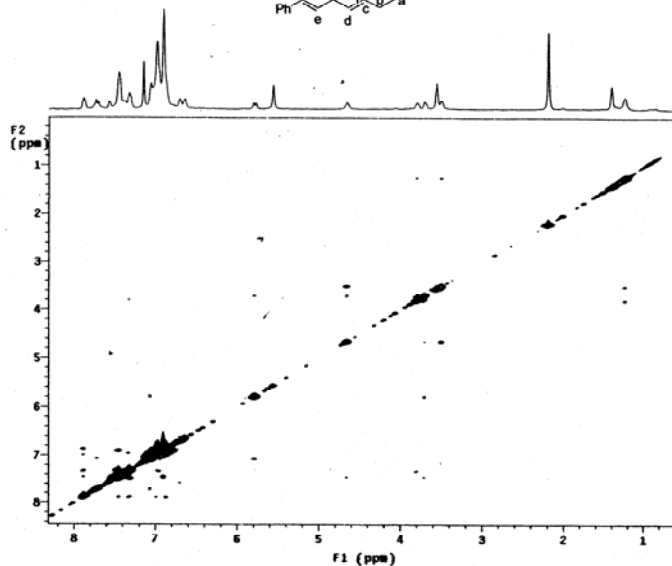

J66-127  
 Pulse Sequence: MOESY  
 Solvent: Benzene  
 Ambient Temperature  
 INOVA-500 "mr3"  
 Relax. delay 1.800 sec  
 Mixing 0.500 sec  
 ACS. Time 0.200 sec  
 Width 4455.6 Hz  
 2D Width 4455.6 Hz  
 16 repetitions  
 2 x 256 increments  
 OBSERVE H1, 499.7714922 MHz  
 DATA PROCESSING  
 Gauss apodization 0.100 sec  
 F1 DATA PROCESSING  
 Gauss apodization 0.041 sec  
 FT size 4096 x 4096  
 Total time 4 hr, 2 min, 53 sec

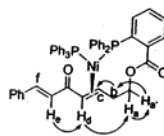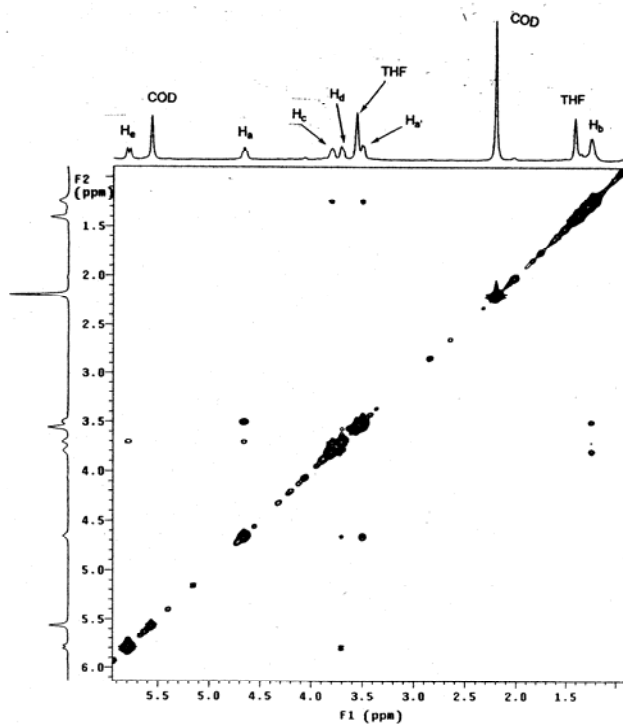

## Deuterium Labelling Experiments (Scheme 7):

### Synthesis of *d*<sub>2</sub>-allylboronic acid pinacol ester (**22**):

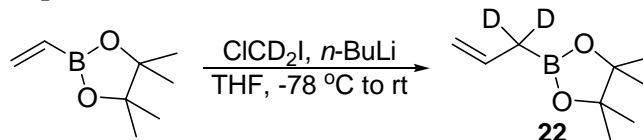

For lead reference see: Sadhu, K. M.; Matteson, D. S. *Organometallics* **1985**, *4*, 1687. To 665 mg (4.32 mmol) of vinylboronic acid pinacol ester and 1.00 g (5.61 mmol) of *d*<sub>2</sub>-chloriodomethane (from Cambridge Isotopes or prepared from CD<sub>2</sub>Cl<sub>2</sub> according to: Miyano, S.; Hashimoto, H. *Bull. Chem. Soc. Jpn.* **1971**, *44*, 2864.) in 17 mL of THF at -78 °C was added 2.07 mL (5.18 mmol) of 2.5 M *n*-BuLi in hexane dropwise. The reaction was then allowed to warm to room temperature and stirring continued overnight. The reaction was concentrated using reduced pressure. The residue was diluted with pentane and filtered through celite. Saturated NH<sub>4</sub>Cl was added and the two layers were filtered through celite. The organic layer was collected and the aqueous layer extracted with pentane. The organic material was dried with MgSO<sub>4</sub> and concentrated using reduced pressure. Purification of the crude mixture using silica gel chromatography (pentane/CH<sub>2</sub>Cl<sub>2</sub>) gave 249 mg (34%) of **22** as a colorless oil that was contaminated with 8% of vinylboronic acid pinacol ester as determined by GLC analysis.

Conjugate allylation using **22**: The conjugate allylation was performed using the same procedure described for Table 1 with **22** in place of allylboronic acid pinacol ester. Chemoselectivity was determined using GLC analysis of the crude reaction mixture. <sup>1</sup>H NMR analysis of the crude material verified that deuterium scrambling of unreacted **22** did not occur under the reaction conditions. The product was purified using silica gel chromatography and the deuterium label ratios determined by <sup>2</sup>H NMR of the purified material.

## Non-linear effects (Figure 1 and 2):

### Effect of ligand optical purity on enantioselectivity:

An oven-dried 2-dram vial equipped with a magnetic stir-bar was charged with 3.0 mg (0.011 mmol) of bis(1,5-cyclooctadiene)nickel. The two enantiopodes of ligand were then added as 0.100 M stock solutions in toluene, using a gas-tight syringe, to make the desired optical purity of ligand for the reaction (0, 25, 50, and 75 % ee was examined). Next, 221 μL of toluene was added, and this mixture was stirred for 45 min. Next, 44.2 mg (0.263 mmol) of allylboronic acid pinacol ester was added followed by 50.0 mg (0.219 mmol) of (1*E*, 4*E*)-1-phenyldeca-1,4-dien-3-one. The vial was capped, taped with electrical tape, removed from the dry-box, and allowed to stir at ambient temperature for 20 h. After this time period, degassed water (N<sub>2</sub> sparge) was added and the mixture transferred to a separatory funnel with CH<sub>2</sub>Cl<sub>2</sub>. After swirling the layers, the organic layer was collected and the aqueous layer washed with CH<sub>2</sub>Cl<sub>2</sub> (2x). The combined organic layers were dried with anhydrous Na<sub>2</sub>SO<sub>4</sub>, and volatiles were removed under reduced pressure. Analysis of the crude reaction mixture using GLC was used to determine the chemoselectivity of the reaction. Purification using silica gel chromatography (hexanes/EtOAc) afforded the conjugate allylation product. Enantioselectivity was determined using SFC analysis of the purified material.

### Effect of ligand optical purity and conversion:

Optically pure and racemic catalyst stock solutions, consisting of mixture of Ni(cod)<sub>2</sub> and ligand **14**, were prepared using 3.4 mg of Ni(cod)<sub>2</sub> and 24.5 mg of optically pure or racemic ligand **14** in 240 μL of *d*<sub>8</sub>-toluene, respectively, and allowed to stand at room temperature for 45 min before use. To two oven-dried J-

Young NMR tubes, in a dry-box, was added 350  $\mu\text{L}$  of a 0.750 M stock solution of allylboronic acid pinacol ester in  $d_8$ -toluene to each tube. To one tube was added 175  $\mu\text{L}$  of the optically pure catalyst stock solution, and to the other tube was added 175  $\mu\text{L}$  of the racemic catalyst solution. Finally, 350  $\mu\text{L}$  of a 0.500 M stock solution of substrate in  $d_8$ -toluene was added to each tube, and they were capped and inverted several times. The reactions were followed by  $^1\text{H}$  NMR, and the ratio of starting material to product was used to calculate conversions. After complete consumption of starting material, the reactions were worked up as described for the conjugate allylation in Table 2.

js4-287column

expi stdlh

SAMPLE DATE Apr 21 2007 DEC. & VT 0  
solvent CDCl3 dn  
file /export/home/~ dpwr 30  
jpm/jds/js4-287col~ dof 0  
\_1H.fid dm nm  
ACQUISITION 400.029 dmf c  
sfrq 400.029 dmf 200  
IN H1 PROCESSING  
at 3.000 wifile ft  
np 35992 proc  
sw 5998.8 fn not used  
fb 3400  
ds 4 wefr  
tpwr 63 wexp  
pw 7.1 wbs  
dl 4.000 wnt  
tof 0  
nt 8  
ct 8  
ct alock not used  
gain not used  
t1 n  
t1 n  
in n  
dp y  
DISPLAY -163.0  
SP WP 3507.7  
VS 369  
SC 0  
WC 250  
hzmm 14.03  
IS 8965.24  
RFI 3902.6  
RFP 2896.2  
TH 20  
INS 1.000  
nm ph

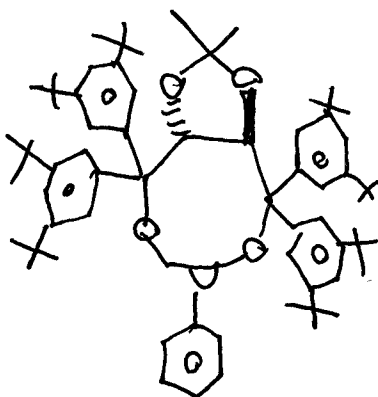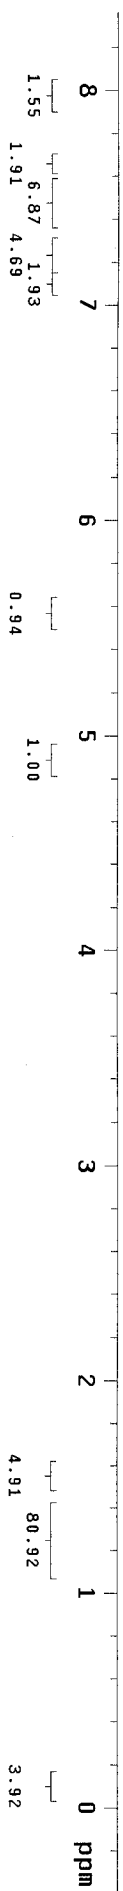

js4-287column

exp3 s2pu1

SAMPLE DATE Apr 21 2007 DEC. 8 VT 499.784  
 SOLVENT COC13 dn H1  
 FILE /export/home/~ jpm/js4-287col-13C- dof 39  
 JPM/js4-287col-13C- dm 0  
 .fid YVV W

ACQUISITION  
 SFRQ 125.683 dmf 11905  
 TN C13 dseq 1.0  
 AT 3.000 dres n  
 NP 200168 homo 28.0  
 SW 33361.1 temp  
 TB 18000  
 BS 4  
 TPWR 54 dfrq2 0  
 DV 7.0 dpr2 1  
 DI 2.000 dpr2 0  
 TOR 818.6 dm2 n  
 NT 1600 dm2 C  
 CT 944 dmf2 10000  
 ALOCK n dseq2  
 GAIN not used dres2 1.0  
 FLAGS not used homo2

PROCESSING 1.00  
 f1 n lb wtrfile ft  
 in y wtrfile ft  
 dp nn prqc not used f  
 HS DISPLAY -228.0 math  
 SP 25601.4 werr  
 WP 132 wexp  
 VS 0 0 wnt  
 SC 250  
 WC 102.41  
 HZMM 500.00  
 IS 13631.1  
 FTI 9676.6  
 TH 100.000  
 INS cdc ph

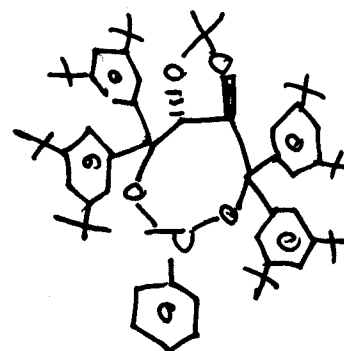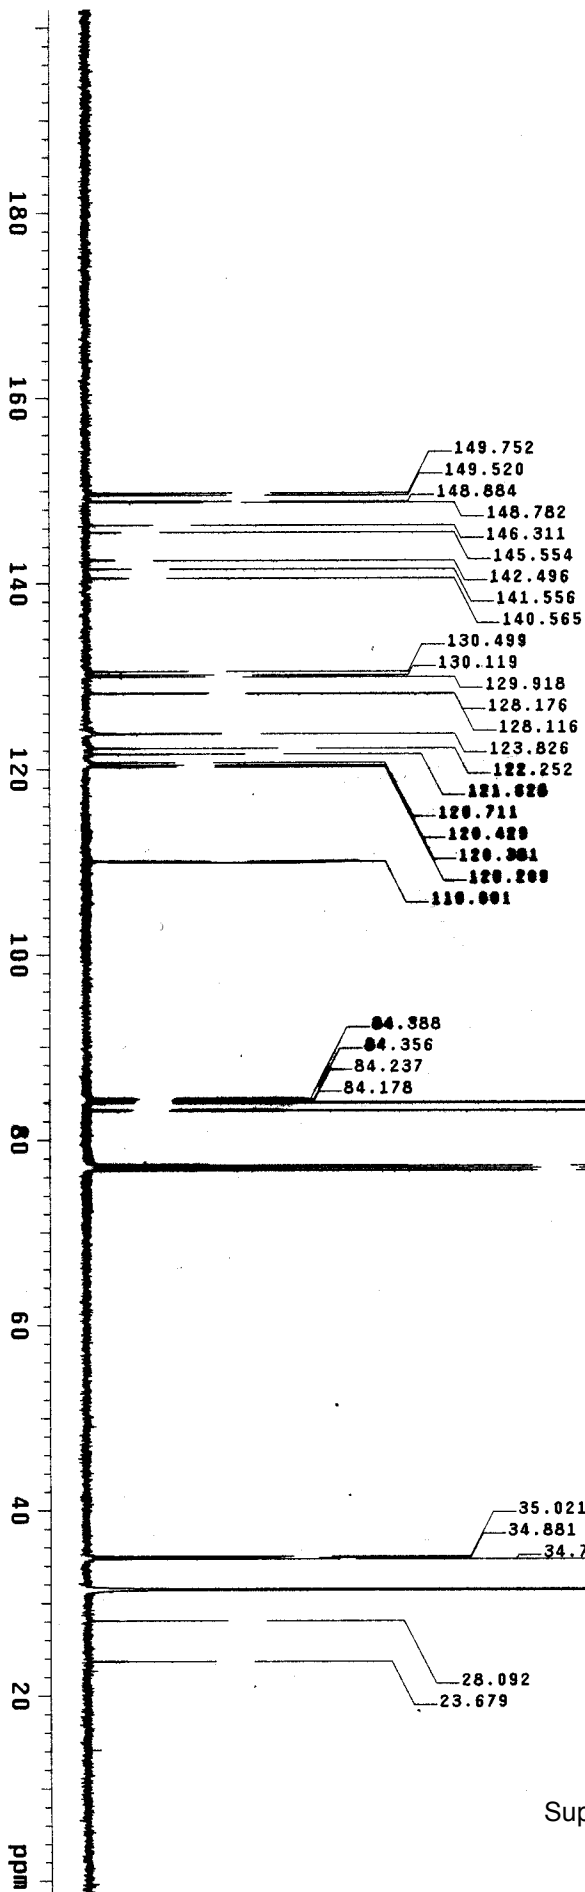

js5-172column

expl std1h

SAMPLE  
 date Apr 11 2007  
 solvent CDCl3  
 file /export/home/~  
 jpm/jds/js5-172col~  
 -1h.fid

DEC. & VT 0  
 dfrq 30  
 dn 0  
 dbwr 0  
 dof nnn  
 dm C  
 dnm 200  
 dmf  
 PROCESSING  
 wifile  
 proc  
 fn  
 not used  
 ft

ACQUISITION  
 sfrq 400.029  
 tn H1  
 at 3.000  
 np 35992  
 sw 5998.8  
 fb 3400  
 bs 4  
 tpwr 63  
 pw 7.1  
 d1 4.000  
 tof 0  
 nt 8  
 ct 8  
 alock not used  
 gain not used  
 FLAGS  
 i1 n  
 in n  
 dp Y

DISPLAY  
 SP 538.6  
 WP 2522.4  
 VS 83  
 SC 0  
 WC 250  
 hzmm 10.09  
 IS 11933.04  
 ffl 3902.4  
 rfp 2896.2  
 th 20  
 tns 1.000  
 nm

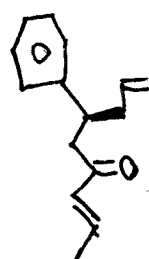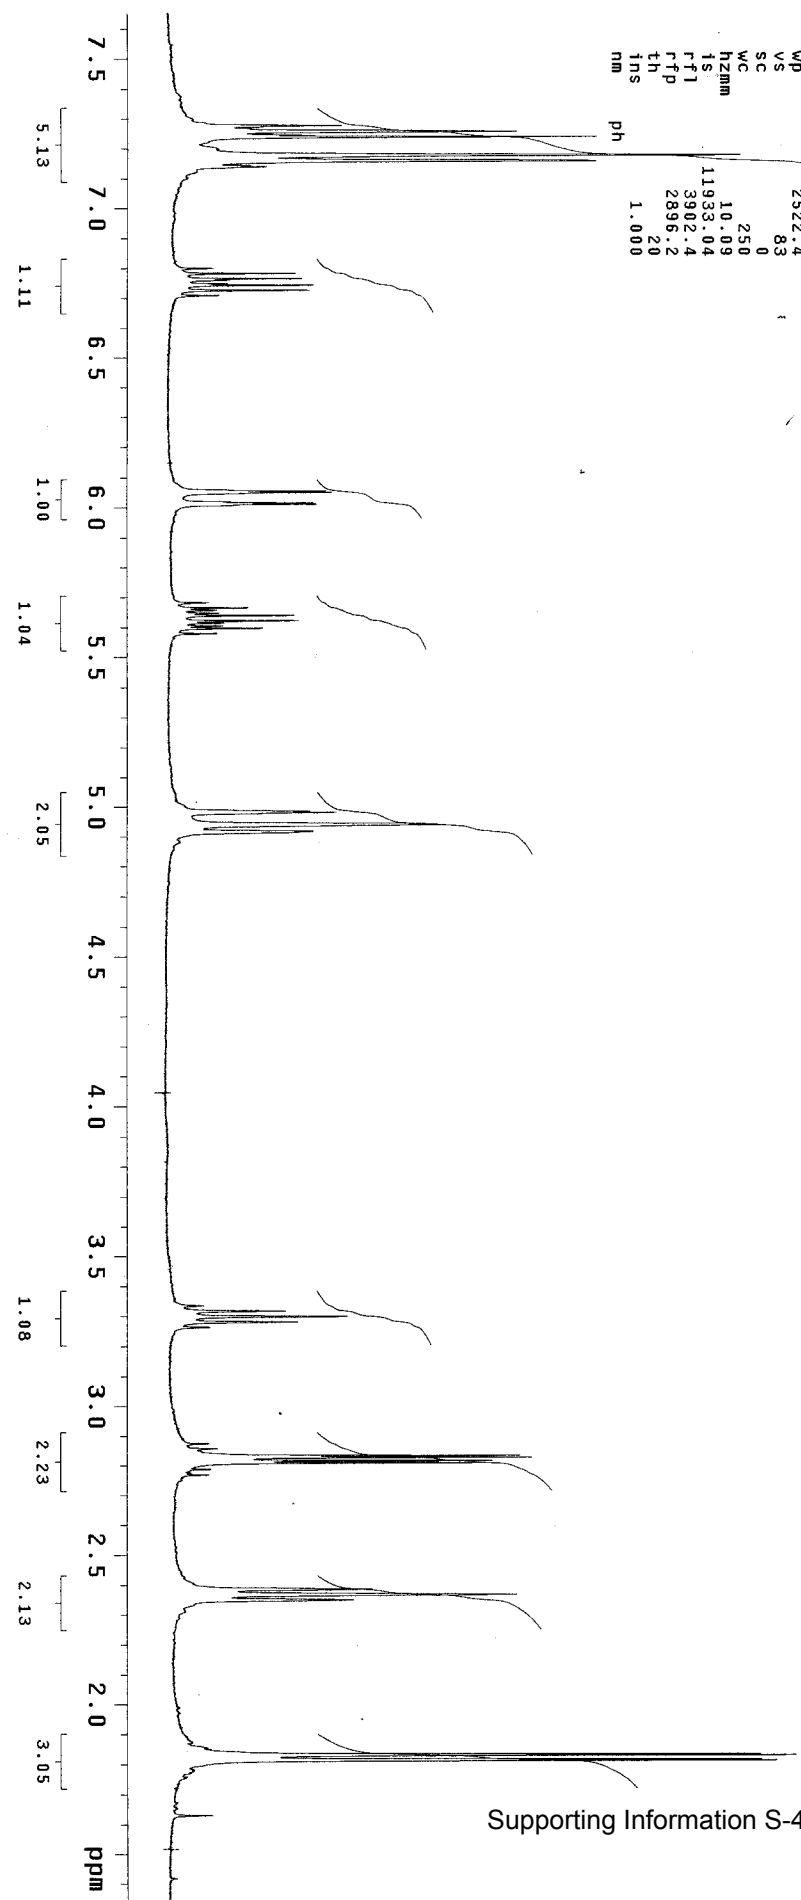

js5-172column

exp2 std13c

```
SAMPLE DEC. 8 VI 400.029
date Apr 11 2007 dfrq
solvent CDC13 dn H1
file exp dofr H1
ACQUISITION dof 45
sfrq 100.599 dm YYY
tn C13 dmf 8617
at 0.640 dmf 8617
np 32876 lb
sw 25683.4 wifile
fb 14200 4 proc
bs 4 not used
tpwr 57 fn
pw 8.7
DI 4.000 wert
tof 2271.7 wexp
nt 1600 wds
ct 168 wnt
alock n
gain not used
. FLAGS n
t1 n
t2 n
t3 n
t4 n
t5 n
t6 n
t7 n
t8 n
t9 n
t10 n
t11 n
t12 n
t13 n
t14 n
t15 n
t16 n
t17 n
t18 n
t19 n
t20 n
t21 n
t22 n
t23 n
t24 n
t25 n
t26 n
t27 n
t28 n
t29 n
t30 n
t31 n
t32 n
t33 n
t34 n
t35 n
t36 n
t37 n
t38 n
t39 n
t40 n
t41 n
t42 n
t43 n
t44 n
t45 n
t46 n
t47 n
t48 n
t49 n
t50 n
t51 n
t52 n
t53 n
t54 n
t55 n
t56 n
t57 n
t58 n
t59 n
t60 n
t61 n
t62 n
t63 n
t64 n
t65 n
t66 n
t67 n
t68 n
t69 n
t70 n
t71 n
t72 n
t73 n
t74 n
t75 n
t76 n
t77 n
t78 n
t79 n
t80 n
t81 n
t82 n
t83 n
t84 n
t85 n
t86 n
t87 n
t88 n
t89 n
t90 n
t91 n
t92 n
t93 n
t94 n
t95 n
t96 n
t97 n
t98 n
t99 n
t100 n
nm no ph 100.000
```

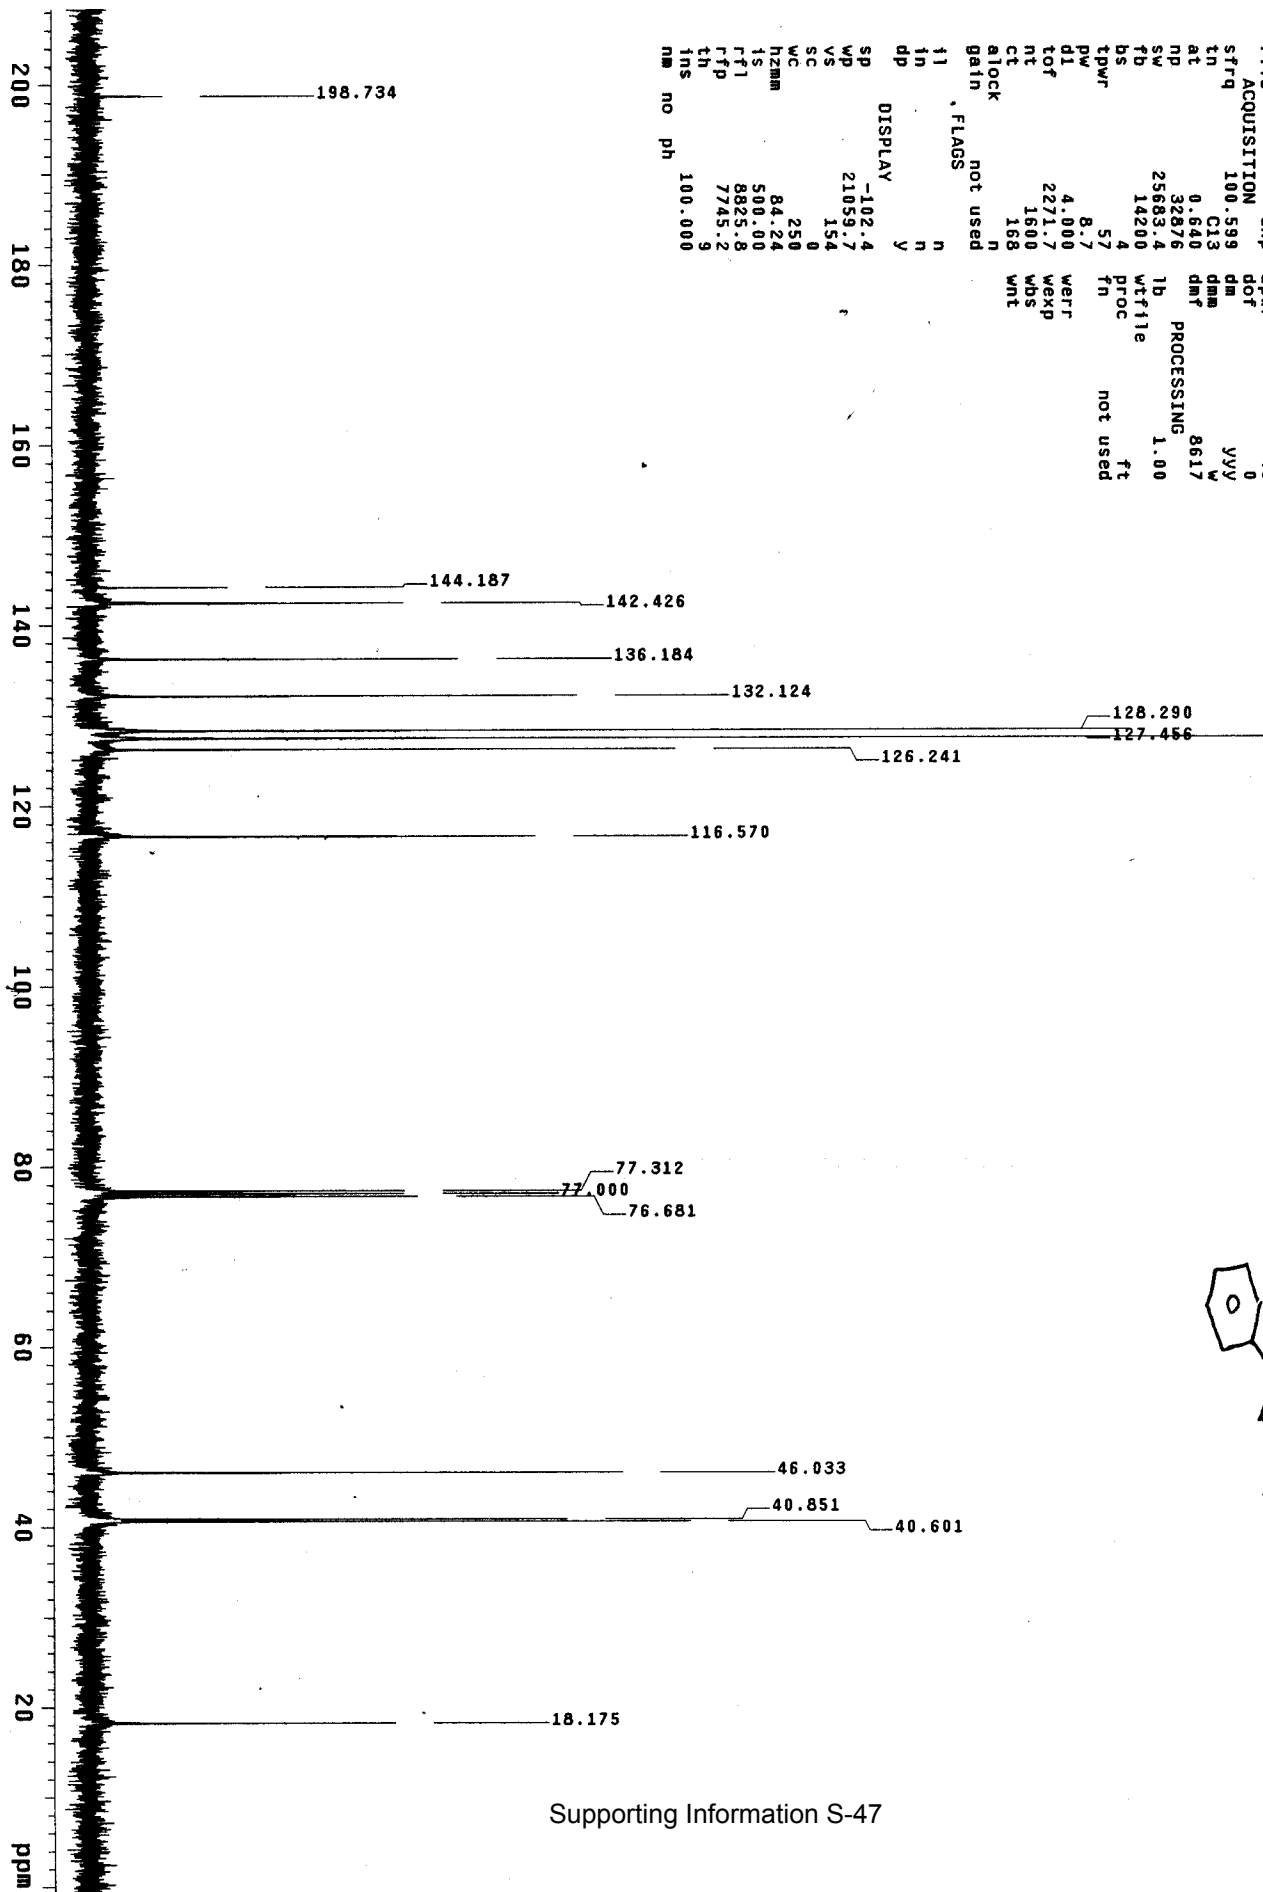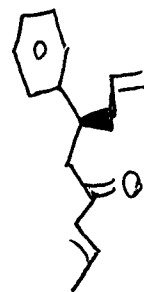

js5-94column  
expi stdih

SAMPLE DEC. & VT 0  
date Apr 11 2007 dfrq  
solvent CDCl3 dn 30  
title /export/home/~ dpwr 0  
jpm/jds/js5-94col~ dot nnn  
IH.fid dm c  
ACQUISITION dmm  
sfrq 400.029 dmf 200  
tn H1  
at 3.000 wtfile  
np 35992 Proc ft  
sw 5998.8 fn not used  
fb 3400  
bs 4 weff  
tpwr 63 wexp  
pw 7.1 wbs  
dl 4.000 wnt  
tof 0  
nt 8  
ct 8  
atlock n  
gain not used  
FLAGS not used  
f1 n  
f2 n  
f3 n  
f4 n  
f5 n  
f6 n  
f7 n  
f8 n  
f9 n  
f10 n  
f11 n  
f12 n  
f13 n  
f14 n  
f15 n  
f16 n  
f17 n  
f18 n  
f19 n  
f20 n  
f21 n  
f22 n  
f23 n  
f24 n  
f25 n  
f26 n  
f27 n  
f28 n  
f29 n  
f30 n  
f31 n  
f32 n  
f33 n  
f34 n  
f35 n  
f36 n  
f37 n  
f38 n  
f39 n  
f40 n  
f41 n  
f42 n  
f43 n  
f44 n  
f45 n  
f46 n  
f47 n  
f48 n  
f49 n  
f50 n  
f51 n  
f52 n  
f53 n  
f54 n  
f55 n  
f56 n  
f57 n  
f58 n  
f59 n  
f60 n  
f61 n  
f62 n  
f63 n  
f64 n  
f65 n  
f66 n  
f67 n  
f68 n  
f69 n  
f70 n  
f71 n  
f72 n  
f73 n  
f74 n  
f75 n  
f76 n  
f77 n  
f78 n  
f79 n  
f80 n  
f81 n  
f82 n  
f83 n  
f84 n  
f85 n  
f86 n  
f87 n  
f88 n  
f89 n  
f90 n  
f91 n  
f92 n  
f93 n  
f94 n  
f95 n  
f96 n  
f97 n  
f98 n  
f99 n  
f100 n

DISPLAY 65.3  
WP 3097.8  
VS 113  
SC 0  
WC 250  
Hz/mm 12.39  
IS 2892.86  
rfl 3902.8  
rfp 2896.2  
th 20  
ins 1.000  
nm

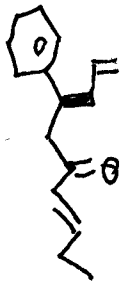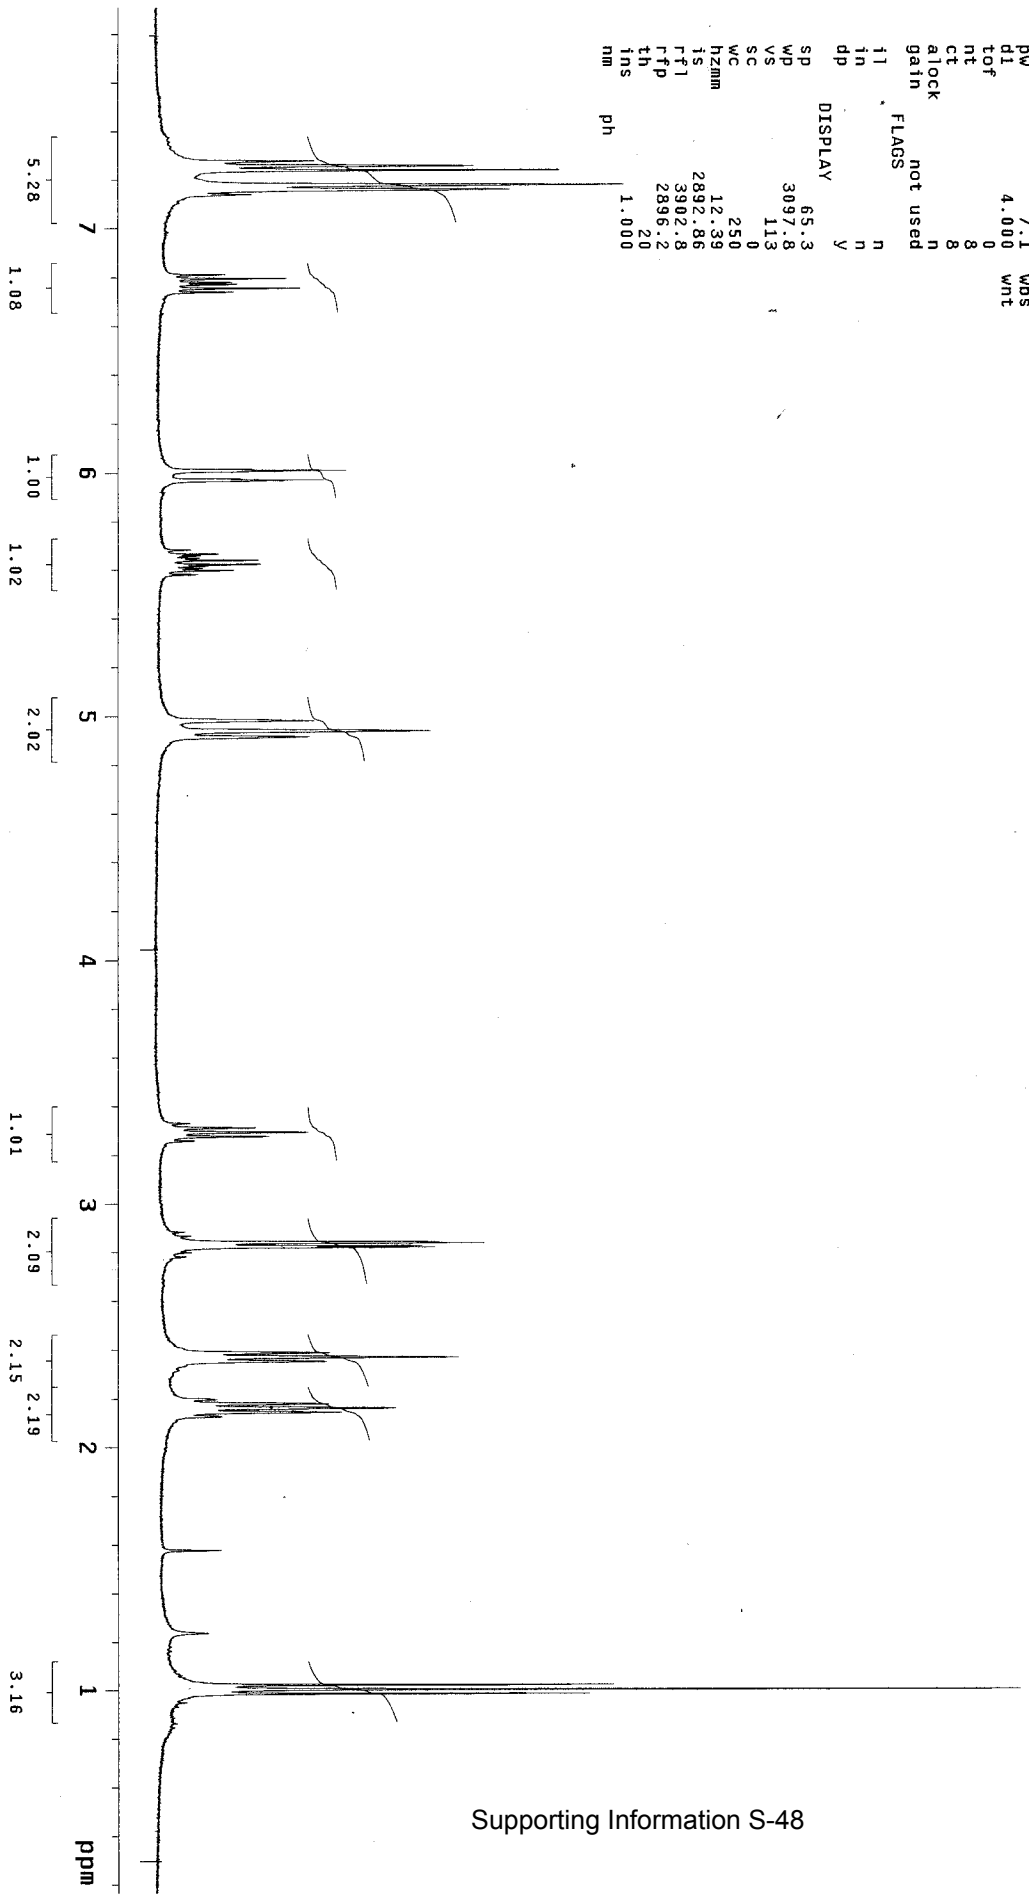



J55-94column

exp2 sid13c

SAMPLE DEC. & VT 400.029

date Apr 11 2007

solvent CDCl3

file exp

ACQUISITION

stfrq 100.599

in C13

at 0.640

np 32876

sw 25689.4

fb 14200

bs 4

ipwr 57

pw 8.7

d1 4.000

tof 2271.7

nt 1600

ct 172

alock not used

gain not used

fl flags

i1 n

in n

dp y

DISPLAY

sp -167.5

wp 20822.9

vs 93

sc 0

wc 250

hzmm 83.29

ls 500.00

rf1 8829.5

rfp 7745.2

ins 5

nm no ph 100.000

dfreq

dn

dpwr

dof

dm

dmm

dntf

lb

wrtfile

proc

fn

not used

ft

werr

wexp

wbs

wnt

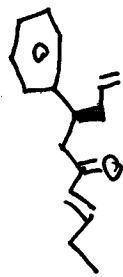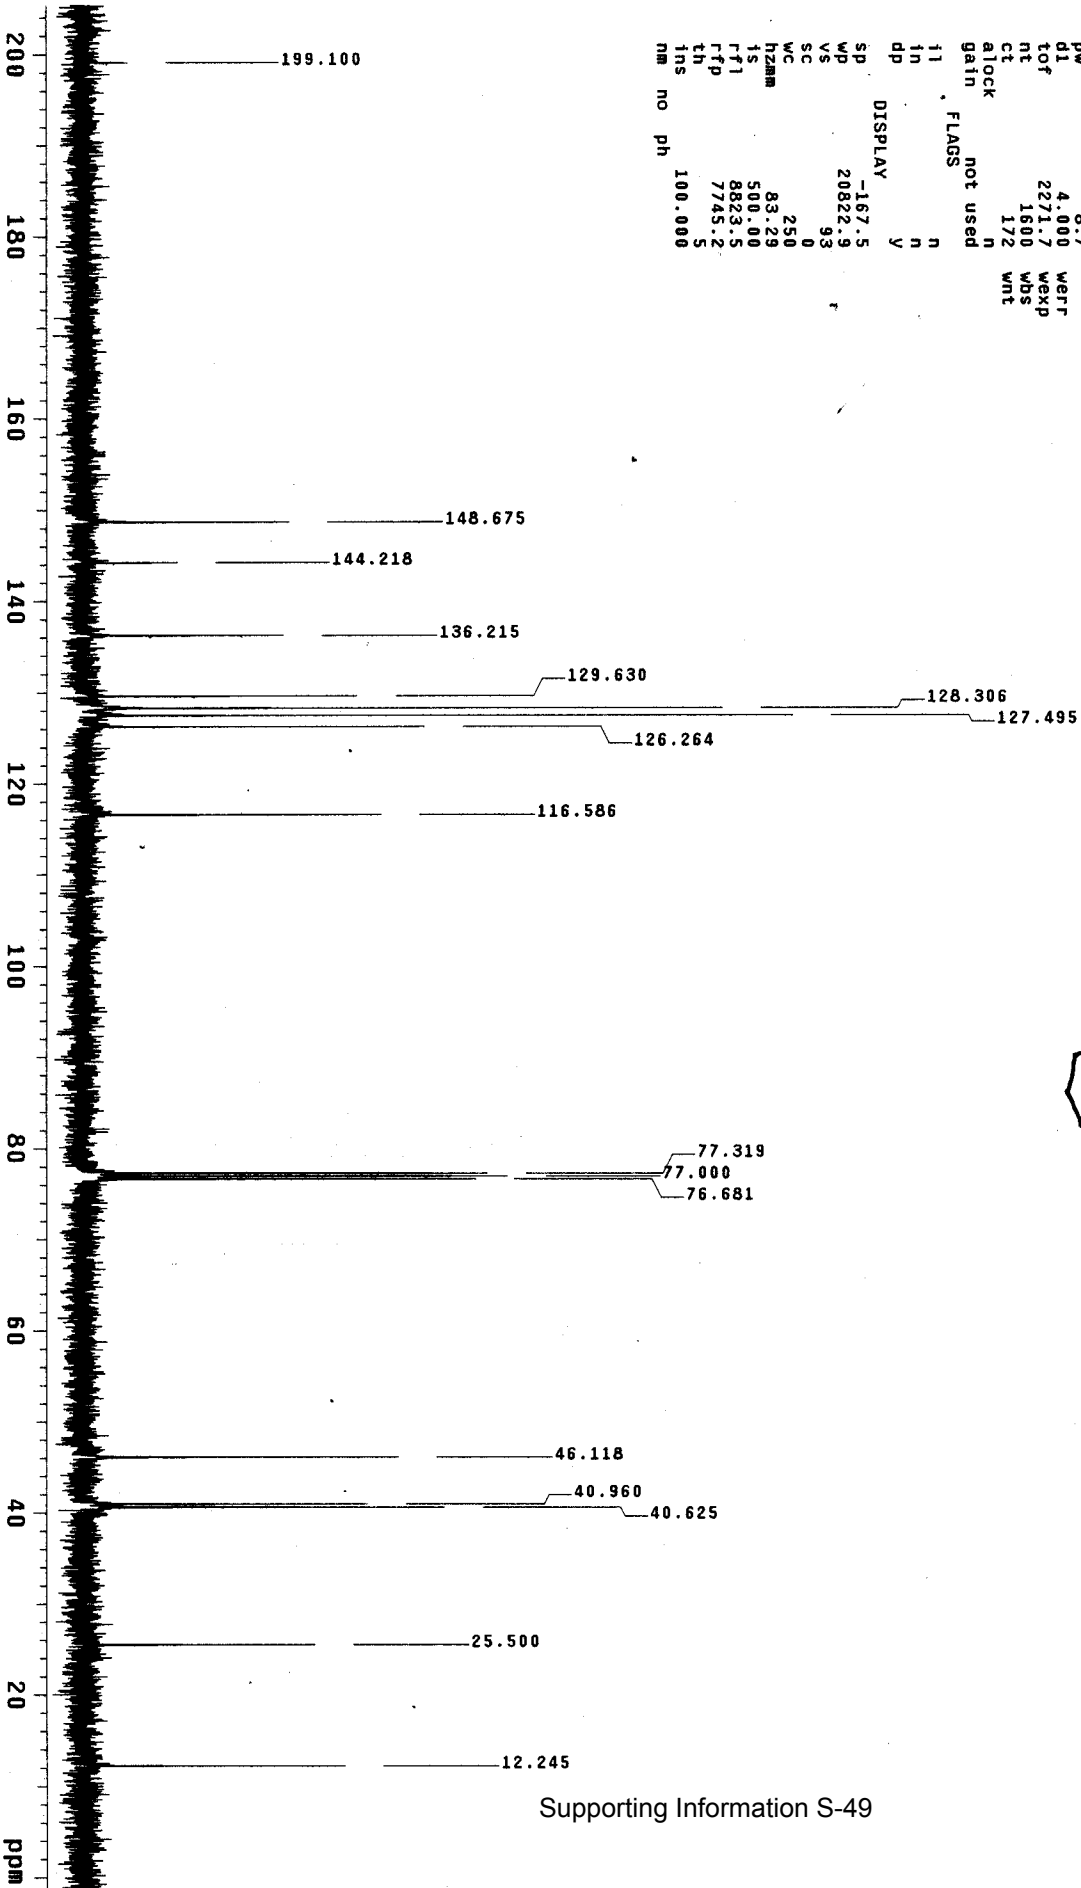

js5-173co1um

expi stidh

|                     |                |             |           |     |
|---------------------|----------------|-------------|-----------|-----|
| SAMPLE              | date           | Apr 11 2007 | DEC. & VT | 0   |
| solvent             | CDCl3          | dn          |           |     |
| title               | /export/home/~ | dpwr        |           | 30  |
| jpm/jds/js5-173co1~ | dm             | dof         |           | 0   |
| -1H.fid             | dm             | nnn         |           | c   |
| ACQUISITION         | dmf            | dmf         |           | 200 |
| sfrq                | 400.029        | PROCESSING  |           |     |
| tn                  | H1             | ft          |           |     |
| at                  | 3.000          | wf file     |           |     |
| np                  | 3592           | proc        |           |     |
| sw                  | 5998.8         | fn          |           |     |
| fb                  | 3400           | not used    |           |     |
| bs                  | 4              | wert        |           |     |
| tpwr                | 63             | wexp        |           |     |
| pw                  | 7.1            | wbs         |           |     |
| dl                  | 4.000          | wnt         |           |     |
| tof                 | 0              |             |           |     |
| nt                  | 8              |             |           |     |
| ct                  | 8              |             |           |     |
| atock               | n              |             |           |     |
| gain                | not used       |             |           |     |
| FLAGS               | not used       |             |           |     |
| fl                  | n              |             |           |     |
| in                  | n              |             |           |     |
| dp                  | y              |             |           |     |
| DISPLAY             |                |             |           |     |
| sp                  | 8.2            |             |           |     |
| wp                  | 3176.7         |             |           |     |
| vs                  | 49             |             |           |     |
| sc                  | 0              |             |           |     |
| wc                  | 250            |             |           |     |
| hzmm                | 12.71          |             |           |     |
| ts                  | 15258.79       |             |           |     |
| rfl                 | 3703.6         |             |           |     |
| rflp                | 2695.0         |             |           |     |
| th                  | 20             |             |           |     |
| ins                 | 1.000          |             |           |     |
| nm                  |                |             |           |     |

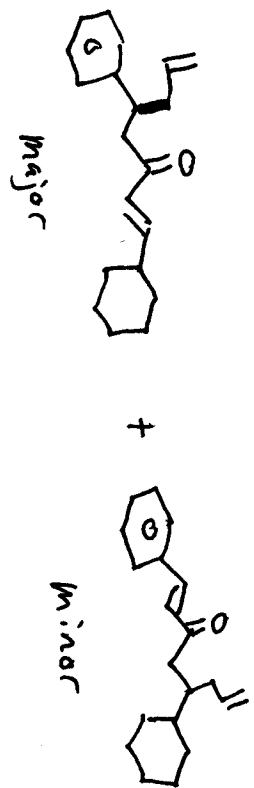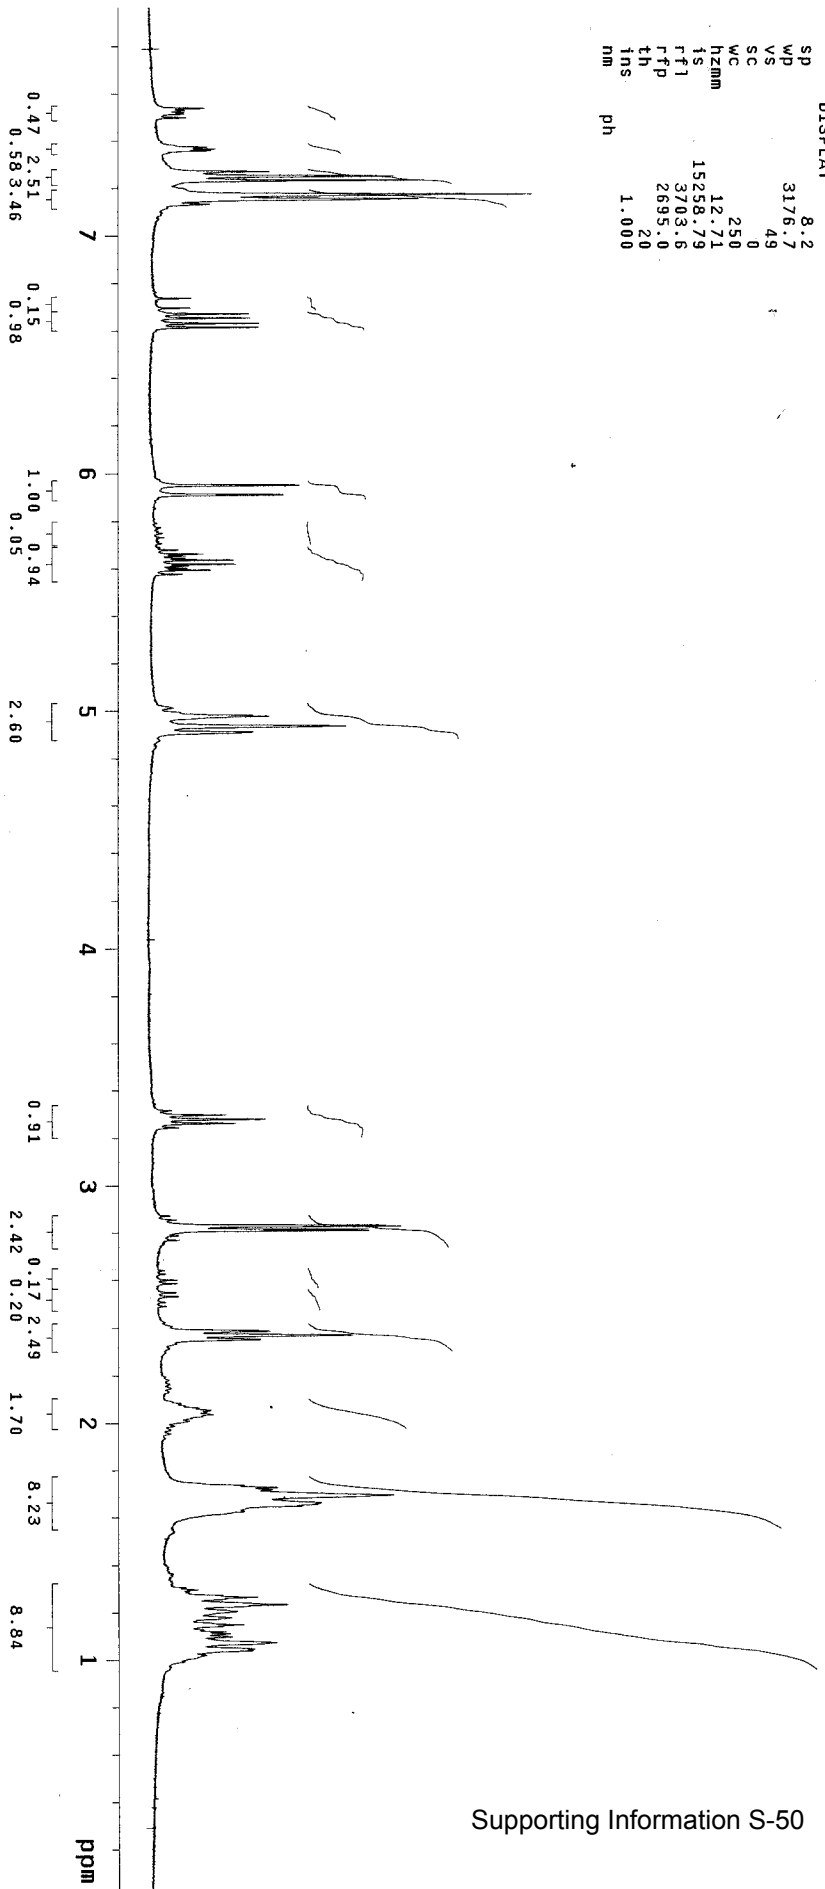

Jss5-173col1umn

exp2 std13c

SAMPLE DEC. & VT 400.029

date Apr 11 2007

solvent CDC13

file /export/home/~

Jpm/JDS/Jss5-173col1

-13C.fid

ACQUISITION

sfrq 100.599

in C13

at 0.640

np 32876

sw 25683.4

fb 14200

ds 57

tpwr 8.7

pl 4.000

dl 2271.7

tof 1500

nt 192

ct not used

atlock not used

gain not used

f1 n

in n

dp y

sp DISPLAY 200.9

wp 21228.2

vs 73

sc 0

wc 250

h2mm 84.91

is 500.00

rf1 8826.6

rfp 7745.2

th 4

tns 100.000

nm no ph

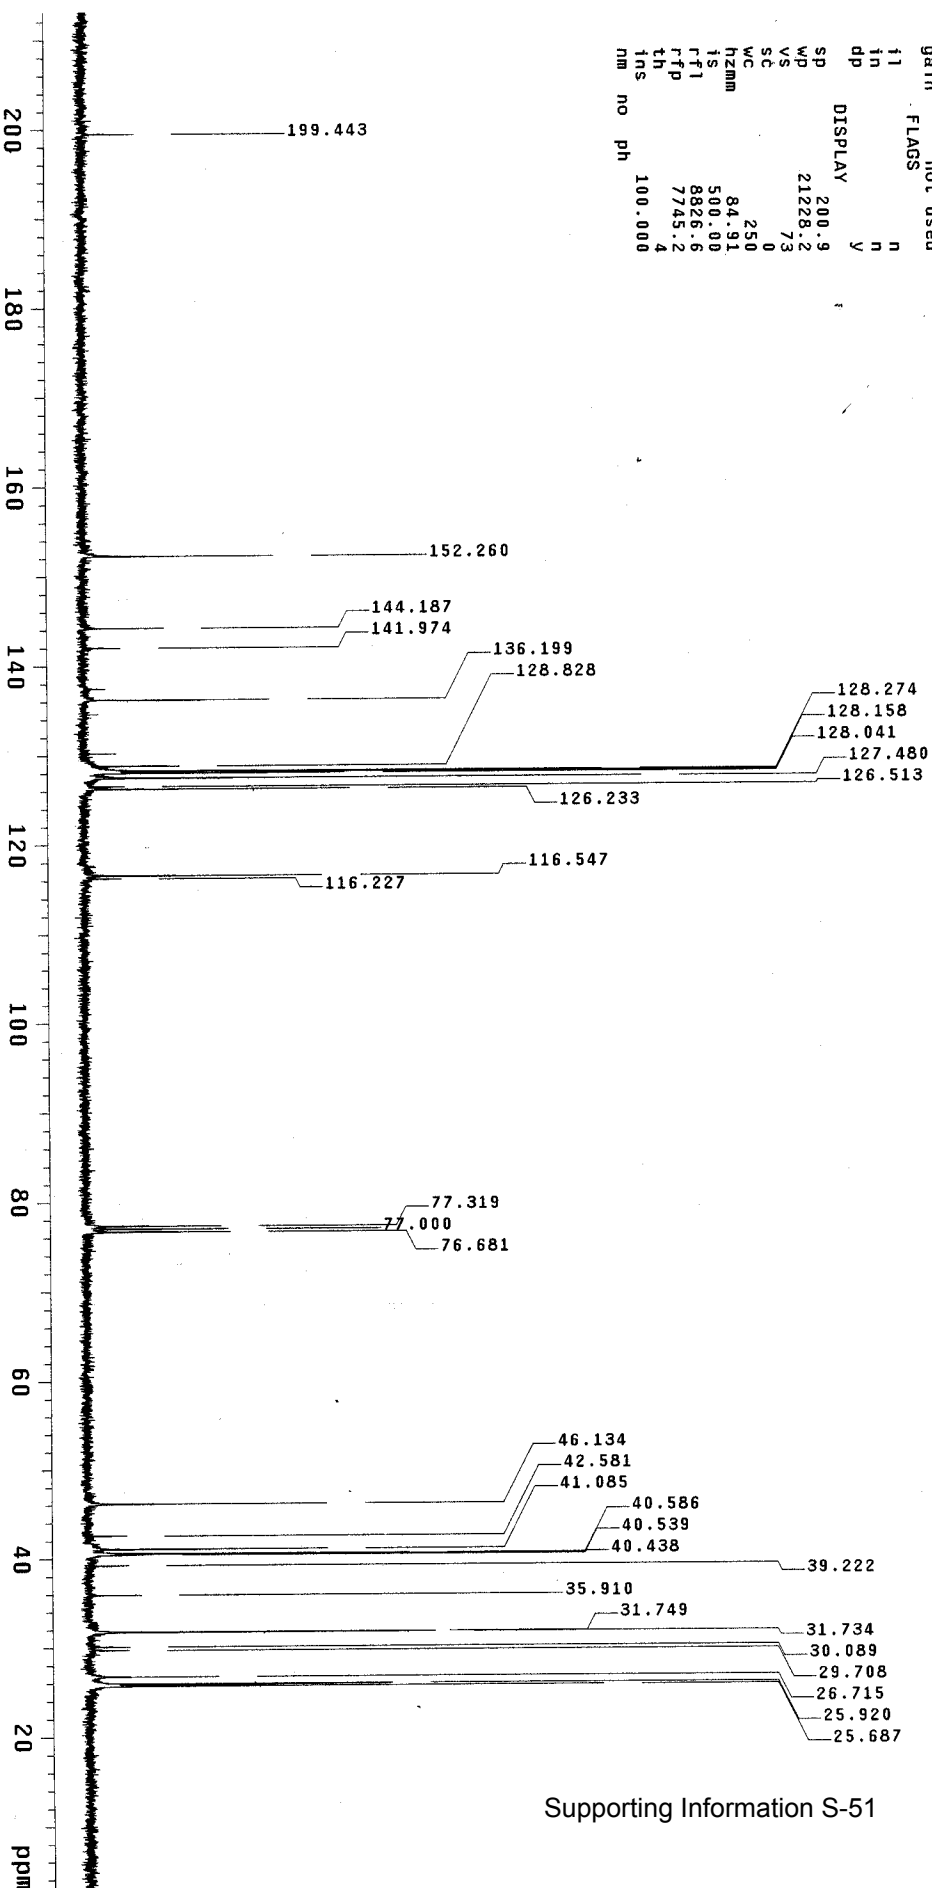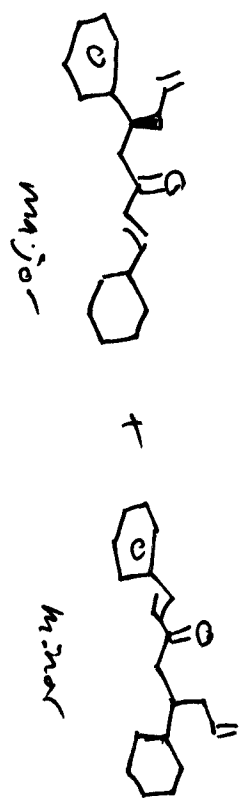

js4-284co1

expl stdih

SAMPLE Dec 9 2006 DEC. & VT 0

date Dec 9 2006 dfrq 0

solvent CDCl3 dn 30

file /export/home/~ dpwr 0

jsm/js4-284co1~ dof nnn

-1h.fid dm c

ACQUISITION dmf 200

sfreq 400.029 dmf

tn H1 wtfile

at 3.000 proc

np 35992 ft

sw 5998.8 fn not used

fb 3400

bs 4 werr

tpwr 63 wexp

pw 7.1 wbs

dl 4.000 wnt

tof 0

nt 64

ct 12

alock n

gain not used

flags

f1 n

f2 n

f3 n

dp y

DISPLAY

sp -1.4

wp 3026.6

vs 154

sc 0

wc 250

hzmm 12.11

ts 16888.58

rfl 1033.9

rflp 0

th 20

ins 1.000

nm

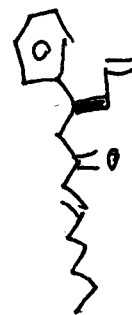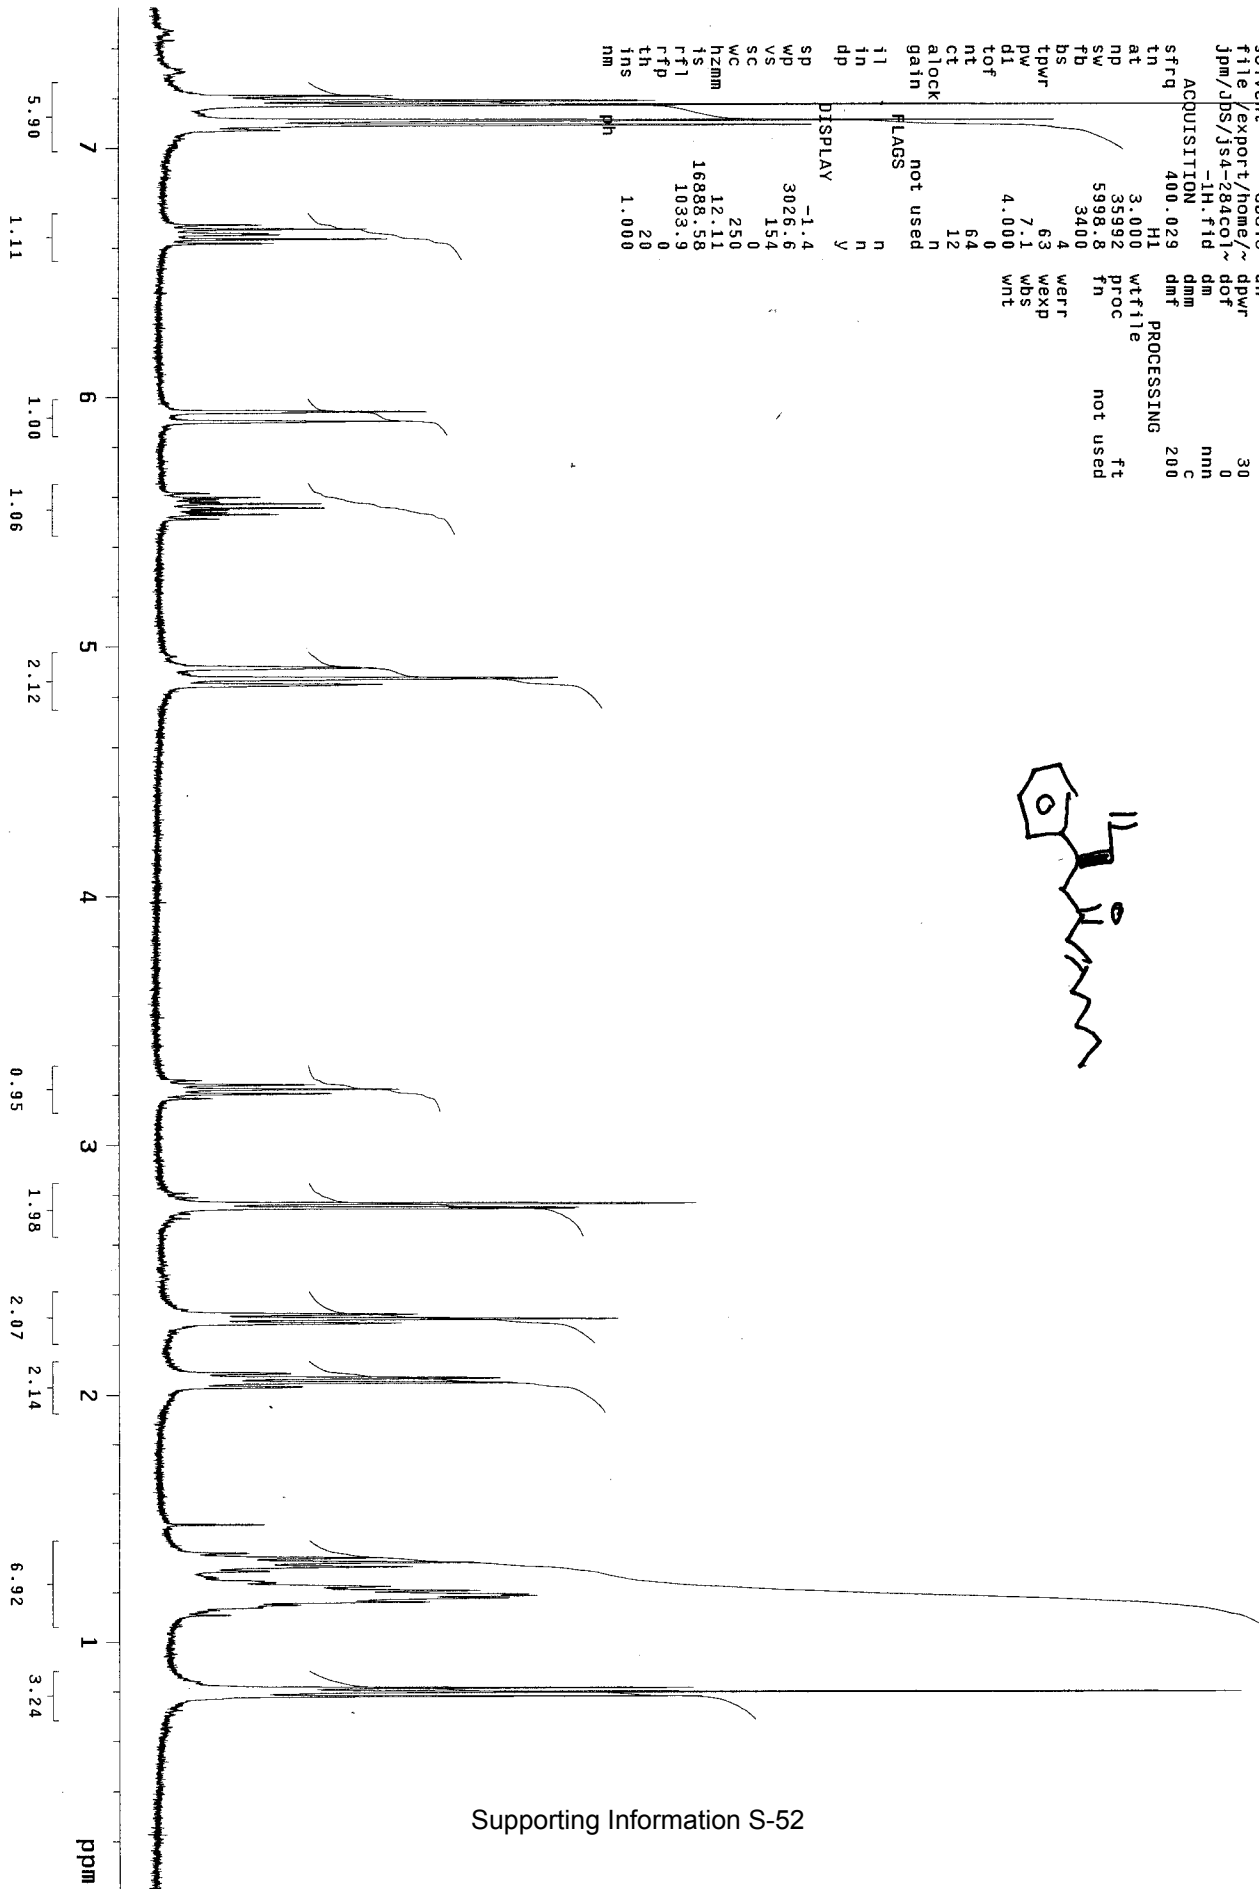

js4-284c01-13c

expl std13c

SAMPLE Dec 8 2006 dfrq 400.029  
 solvent CDCl3 dn HI  
 title ACQUISITION exp dpwr 45  
 strq 100.599 dm dot 0  
 tn C13 dmm vvy  
 at 0.640 dmf 8617  
 nd 32876  
 SW 25683.4 lb  
 fd 14200 wfttle  
 bs 16 fn  
 tpwr 57 ft  
 pw 8.7 not used  
 di 4.000 wefr  
 tof 2271.7 wexp  
 nt 40000 wbs  
 ct 64 wnt  
 alock not used  
 gain n  
 flags not used  
 il n  
 in n  
 dp y  
 DISPLAY -272.5  
 SP WP 21363.0  
 VS SC 49  
 WC 250  
 hzmm 85.45  
 is 500.00  
 rfl 8827.4  
 rfp 7745.2  
 th 5  
 ins 100.000  
 nm no ph

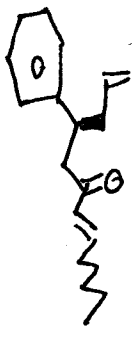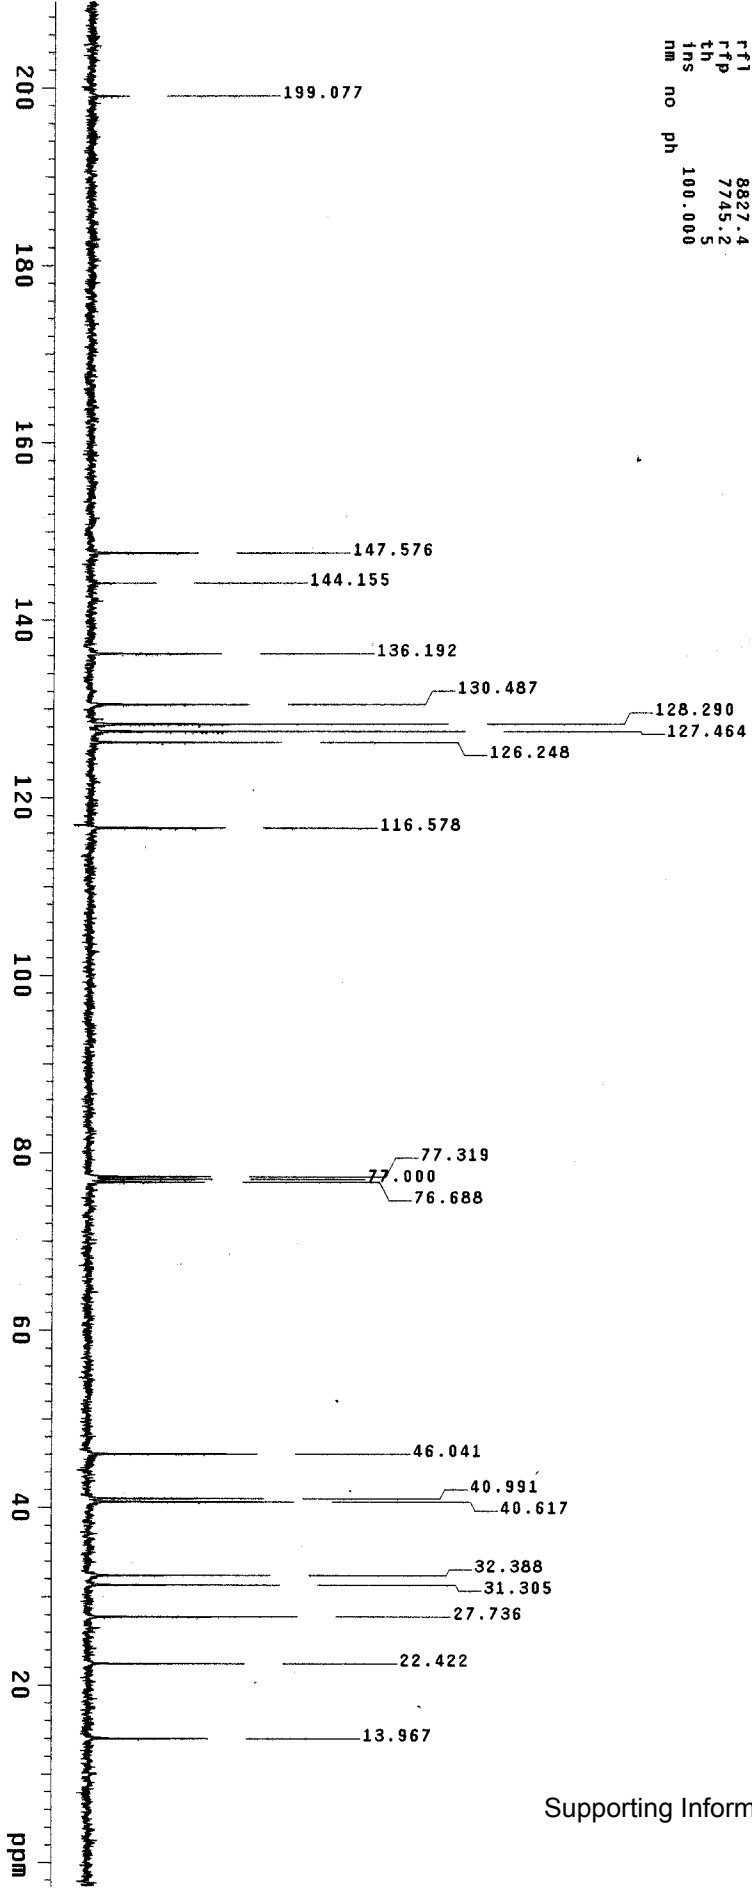

js4-285colmaj-1H

expt std1h

|                      |                |            |          |
|----------------------|----------------|------------|----------|
| SAMPLE               | Dec 15 2006    | dfreq      | 0        |
| date                 | Dec 15 2006    | dn         | 0        |
| solvent              | CDCl3          | dpwr       | 30       |
| title                | /export/home/~ | dof        | 0        |
| jpnm/jds/js4-285co1~ |                | dmm        | nmn      |
| maj-1H.fid           |                | dmf        | C        |
| ACQUISITION          | 400.029        | dmf        | 200      |
| sfrq                 | 400.029        | dmf        | 200      |
| tn                   | H1             | PROCESSING |          |
| at                   | 3.000          | wtfile     | ft       |
| np                   | 35992          | proc       | not used |
| sw                   | 5998.8         | fn         |          |
| fb                   | 3400           | werf       | 4        |
| bs                   |                | wexp       | 63       |
| tpwr                 |                | wbs        | 7.1      |
| pw                   | 7.1            | wnt        | 4.000    |
| d1                   | 4.000          |            |          |
| tof                  | 0              |            |          |
| nt                   | 16             |            |          |
| ct                   | 8              |            |          |
| alock                | n              |            |          |
| gain                 | not used       |            |          |
| FLAGS                | not used       |            |          |
| f1                   | n              |            |          |
| f2                   | n              |            |          |
| f3                   | n              |            |          |
| f4                   | n              |            |          |
| f5                   | n              |            |          |
| f6                   | n              |            |          |
| f7                   | n              |            |          |
| f8                   | n              |            |          |
| f9                   | n              |            |          |
| f10                  | n              |            |          |
| f11                  | n              |            |          |
| f12                  | n              |            |          |
| f13                  | n              |            |          |
| f14                  | n              |            |          |
| f15                  | n              |            |          |
| f16                  | n              |            |          |
| f17                  | n              |            |          |
| f18                  | n              |            |          |
| f19                  | n              |            |          |
| f20                  | n              |            |          |
| f21                  | n              |            |          |
| f22                  | n              |            |          |
| f23                  | n              |            |          |
| f24                  | n              |            |          |
| f25                  | n              |            |          |
| f26                  | n              |            |          |
| f27                  | n              |            |          |
| f28                  | n              |            |          |
| f29                  | n              |            |          |
| f30                  | n              |            |          |
| f31                  | n              |            |          |
| f32                  | n              |            |          |
| f33                  | n              |            |          |
| f34                  | n              |            |          |
| f35                  | n              |            |          |
| f36                  | n              |            |          |
| f37                  | n              |            |          |
| f38                  | n              |            |          |
| f39                  | n              |            |          |
| f40                  | n              |            |          |
| f41                  | n              |            |          |
| f42                  | n              |            |          |
| f43                  | n              |            |          |
| f44                  | n              |            |          |
| f45                  | n              |            |          |
| f46                  | n              |            |          |
| f47                  | n              |            |          |
| f48                  | n              |            |          |
| f49                  | n              |            |          |
| f50                  | n              |            |          |
| f51                  | n              |            |          |
| f52                  | n              |            |          |
| f53                  | n              |            |          |
| f54                  | n              |            |          |
| f55                  | n              |            |          |
| f56                  | n              |            |          |
| f57                  | n              |            |          |
| f58                  | n              |            |          |
| f59                  | n              |            |          |
| f60                  | n              |            |          |
| f61                  | n              |            |          |
| f62                  | n              |            |          |
| f63                  | n              |            |          |
| f64                  | n              |            |          |
| f65                  | n              |            |          |
| f66                  | n              |            |          |
| f67                  | n              |            |          |
| f68                  | n              |            |          |
| f69                  | n              |            |          |
| f70                  | n              |            |          |
| f71                  | n              |            |          |
| f72                  | n              |            |          |
| f73                  | n              |            |          |
| f74                  | n              |            |          |
| f75                  | n              |            |          |
| f76                  | n              |            |          |
| f77                  | n              |            |          |
| f78                  | n              |            |          |
| f79                  | n              |            |          |
| f80                  | n              |            |          |
| f81                  | n              |            |          |
| f82                  | n              |            |          |
| f83                  | n              |            |          |
| f84                  | n              |            |          |
| f85                  | n              |            |          |
| f86                  | n              |            |          |
| f87                  | n              |            |          |
| f88                  | n              |            |          |
| f89                  | n              |            |          |
| f90                  | n              |            |          |
| f91                  | n              |            |          |
| f92                  | n              |            |          |
| f93                  | n              |            |          |
| f94                  | n              |            |          |
| f95                  | n              |            |          |
| f96                  | n              |            |          |
| f97                  | n              |            |          |
| f98                  | n              |            |          |
| f99                  | n              |            |          |
| f100                 | n              |            |          |

|       |         |         |   |
|-------|---------|---------|---|
| SP    | 79.6    | DISPLAY | y |
| WP    | 2916.6  |         |   |
| VS    | 113     |         |   |
| SC    | 0       |         |   |
| WC    | 250     |         |   |
| Hz/mm | 11.57   |         |   |
| IS    | 5899.78 |         |   |
| IS    | 3904.2  |         |   |
| rfl   | 2896.2  |         |   |
| th    | 20      |         |   |
| ins   | 1.000   |         |   |
| nm    |         |         |   |

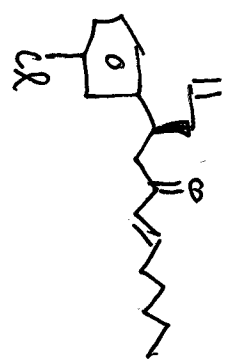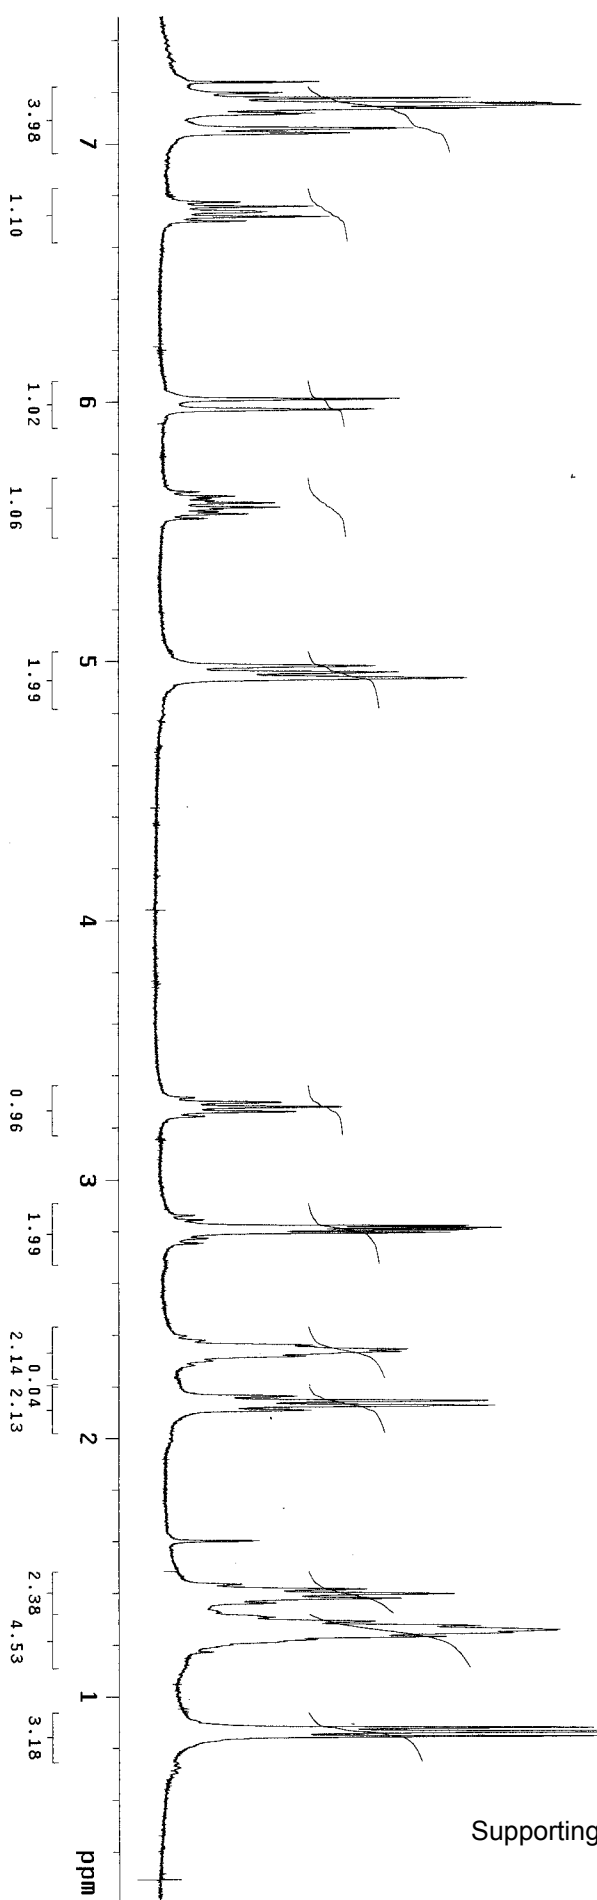

J54-285colmaj-13C

exp3 std13c

|             |             |            |          |
|-------------|-------------|------------|----------|
| SAMPLE      | Dec 15 2006 | DEC. & VT  | 400.029  |
| date        | Dec 15 2006 | dfreq      | HL       |
| solvent     | CDCl3       | dn         | HL       |
| title       | exp         | dpwr       | 45       |
| ACQUISITION | exp         | dof        | 0        |
| freq        | 100.599     | dm         | VVY      |
| tn          | C13         | dmm        | W        |
| at          | 0.640       | dmf        | 8617     |
| np          | 32876       | PROCESSING | 2.00     |
| sw          | 25683.4     | lb         |          |
| td          | 14200       | wffile     |          |
| bs          | 4           | proc       | not used |
| tpwr        | 57          | fn         | ft       |
| pv          | 8.7         | werr       |          |
| dl          | 4.000       | wexp       |          |
| tof         | 2271.7      | wbs        |          |
| nt          | 40000       | wnt        |          |
| ct          | 292         |            |          |
| alock       | not used    |            |          |
| gain        | not used    |            |          |
| FLAGS       |             |            |          |
| il          | n           |            |          |
| in          | n           |            |          |
| dp          | y           |            |          |
| DISPLAY     |             |            |          |
| sp          | -202.7      |            |          |
| wp          | 21464.1     |            |          |
| vs          | 34          |            |          |
| sc          | 0           |            |          |
| wc          | 250         |            |          |
| hzmm        | 85.86       |            |          |
| is          | 500.00      |            |          |
| rfi         | 8825.0      |            |          |
| rtp         | 7745.2      |            |          |
| th          | 6           |            |          |
| tns         | 100.000     |            |          |
| nm          | no          |            |          |
| ph          |             |            |          |

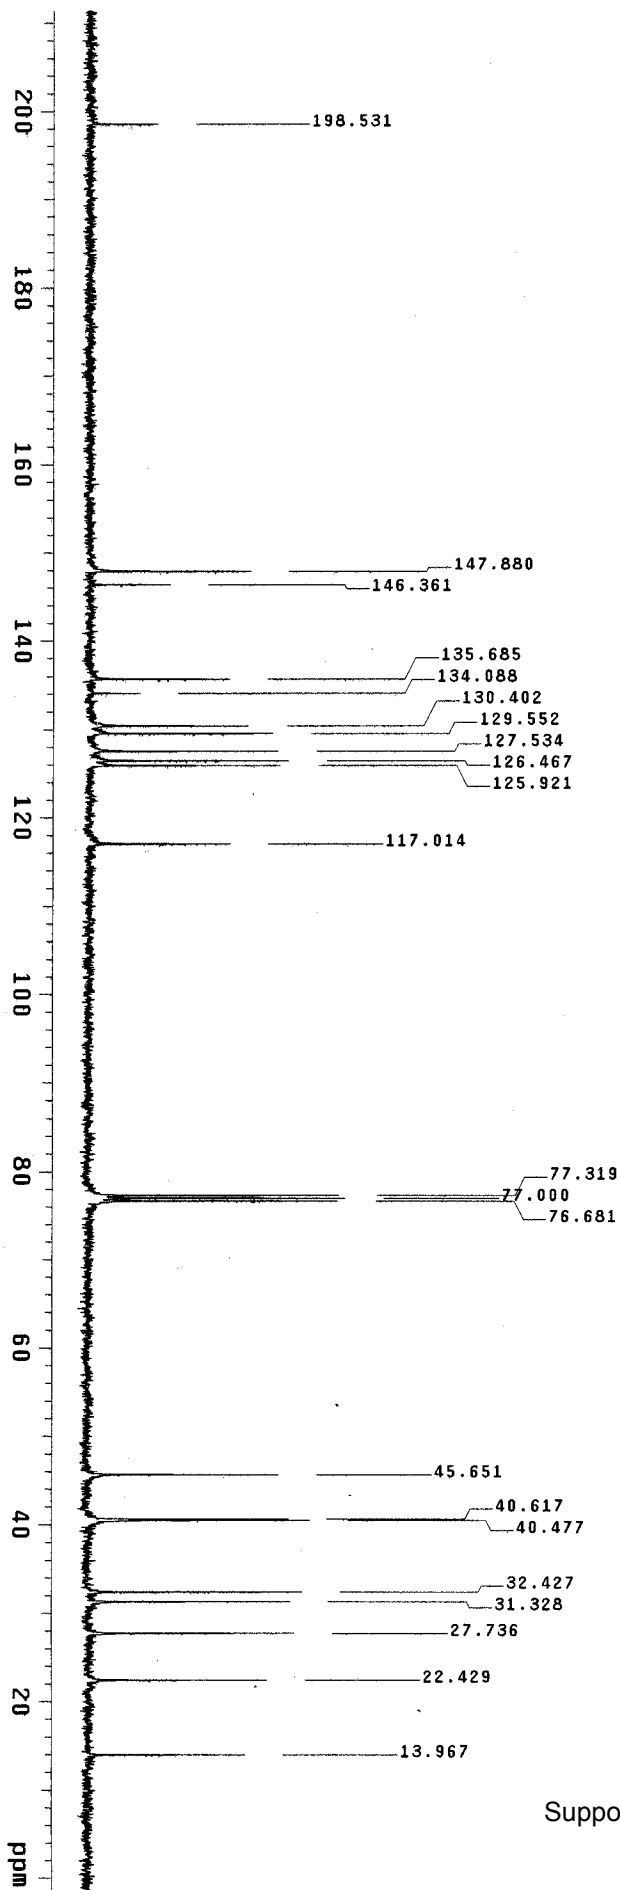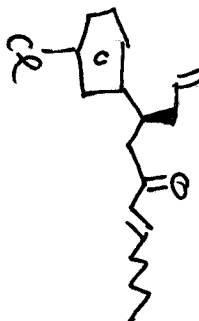

js4-282c01-1H

expl std1h

SAMPLE Dec 11 2006 dfrq 0  
 date DEC. & VT 0  
 solvent CDCl3 dn  
 file /export/home/~ dpwr 30  
 jpm/js4-282c01-1H.fid dm 0  
 -1H.fid dm nnn  
 ACQUISITION dmf c  
 400.029 dmf 200

PROCCESSING  
 tn H1 wtfile  
 at 3.000 proc ft  
 np 35992 fn not used  
 sw 5998.8  
 fb 3400  
 bs 4 weff  
 tpwr 63 wexp  
 pw 7.1 wds  
 dl 4.000 wnt  
 tof 0  
 nt 8  
 ct 8  
 alock n  
 gain not used

FLAGS not used  
 i1 n  
 in n  
 dp y  
 DISPLAY  
 sp 48.3  
 wp 2916.6  
 vs 147  
 sc 0  
 wc 250  
 hzmm 11.67  
 ts 9527.53  
 rfl 3903.1  
 rfp 2896.2  
 th 20  
 tns 1.000  
 nm

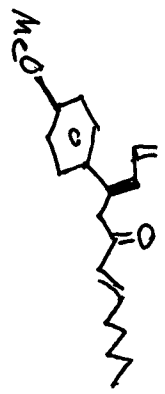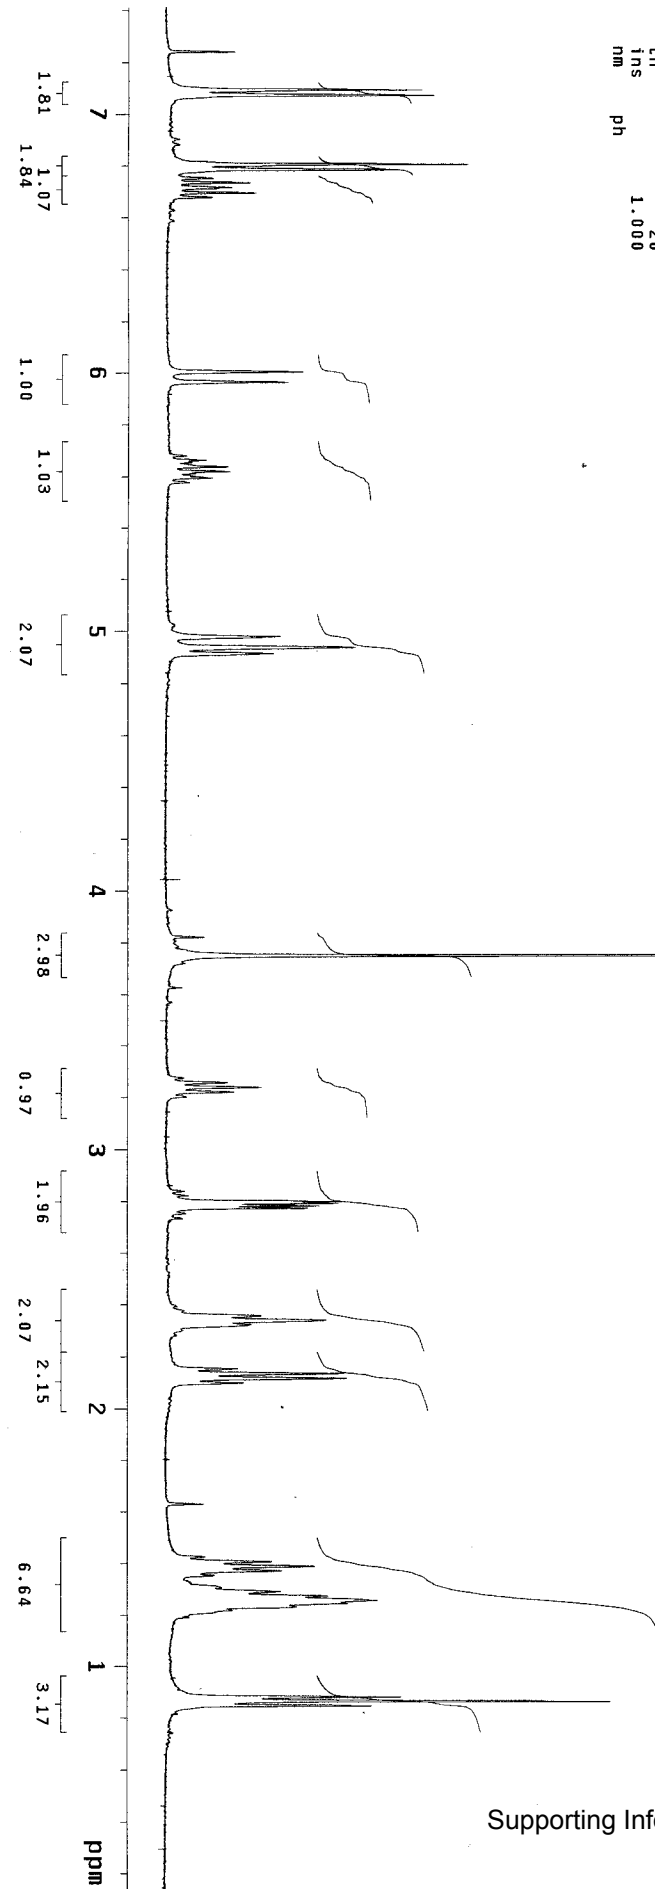



J54-282CO1-13C

exp2 std13c

SAMPLE

date Dec 11 2006

solvent CDC13

file exp

ACQUISITION

sfrq 100.599

tn C13

at 0.640

np 328.76

sw 25683.4

fb 14200

bs 4

tpwr 57

pw 8.7

di 4.000

tof 2271.7

nt 40000

ct 136

aioclk not used

gain not used

flags

il n

ih n

ip y

DISPLAY

sp -237.2

wd 21329.3

vs 140

sc 0

wc 250

nzmm 85.32

rs 500.00

rft 8825.8

rffp 7745.2

th 13

ins no

ph 100.000

DEC. & VT

dfrq 400.029

dn H1

dpwr 45

dof 0

dm YVY

dmm W

dmt 8617

PROCESSING

2.00

lb

wfifile

proc

fn

not used

wt

weff

wexp

wds

wnt

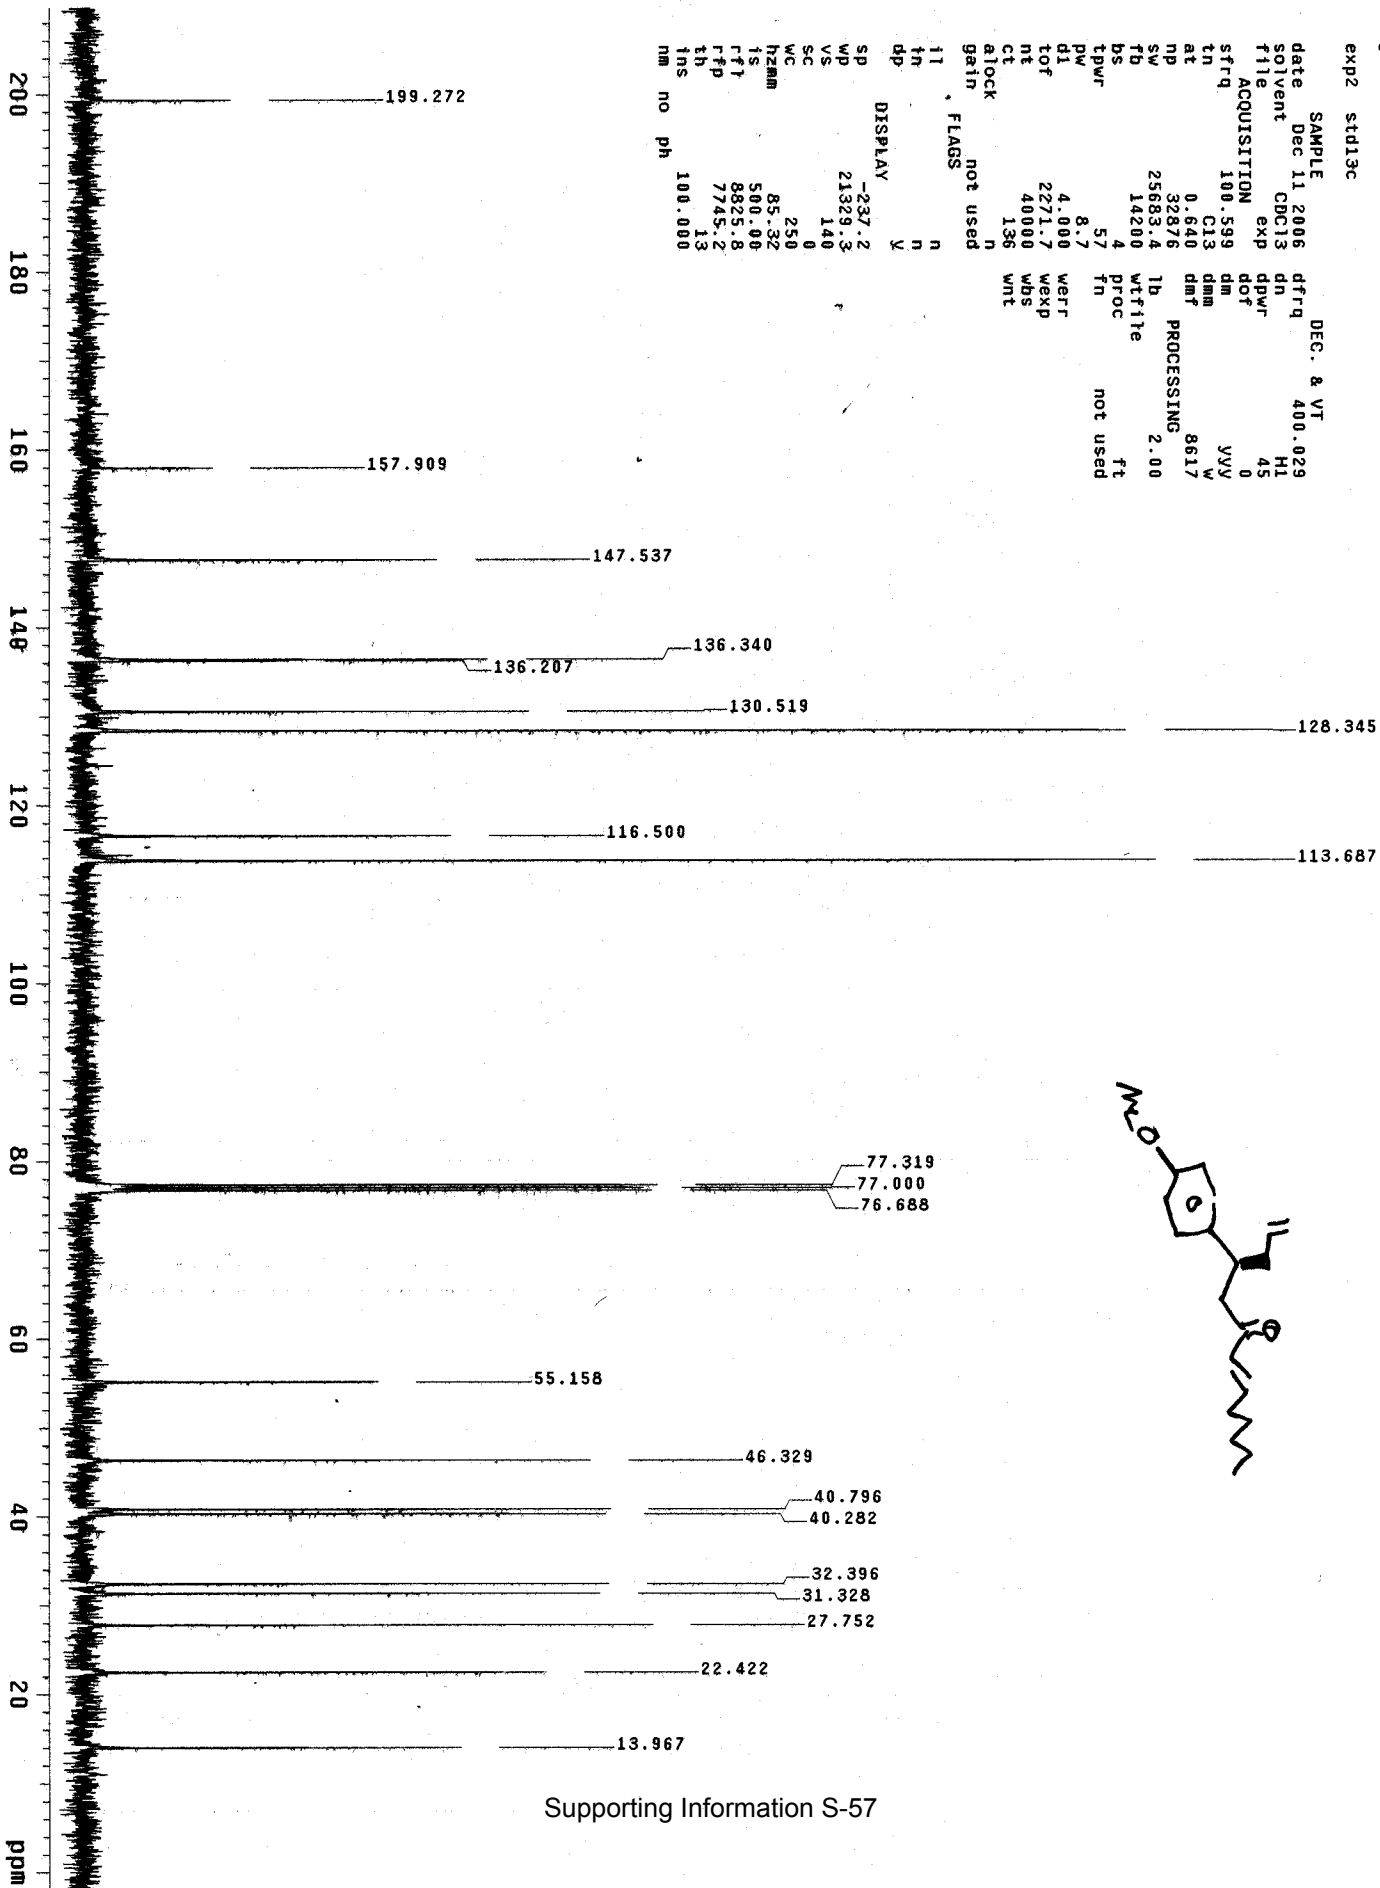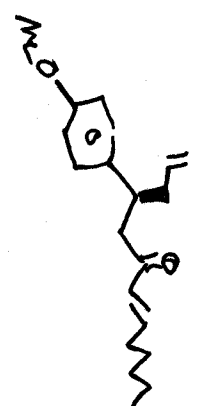

js4-263co1-1H

expl std1h

SAMPLE 9 2006 DEC. & VI

date Dec 9 2006 dfrq 0

solvent CDCl3 dn 30

file /export/home/~ dpwr 0

jsm/js4-263co1~ dof nnn

-1h.f1d dm c

ACQUISITION dmf 200

sfrq 400.029 dmf

tn H1 wtfile PROCESSING

at 3.000 ft

np 35992 proc not used

sw 5998.8 fn

fb 3400

bs 16 werr

tpwr 63 wexp

pw 7.1 wbs

dl 4.000 wnt

tof 0

nt 4

ct 4

alock n

gain not used

flags not used

i1 n

in n

dp y

DISPLAY

sp 9.7

wp 2995.3

vs 351

sc 0

wc 250

hzmm 11.98

ls 10687.50

rfl 3903.3

rfd 2896.2

th 20

ins 1.000

nm

ph

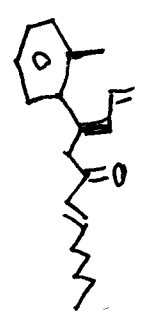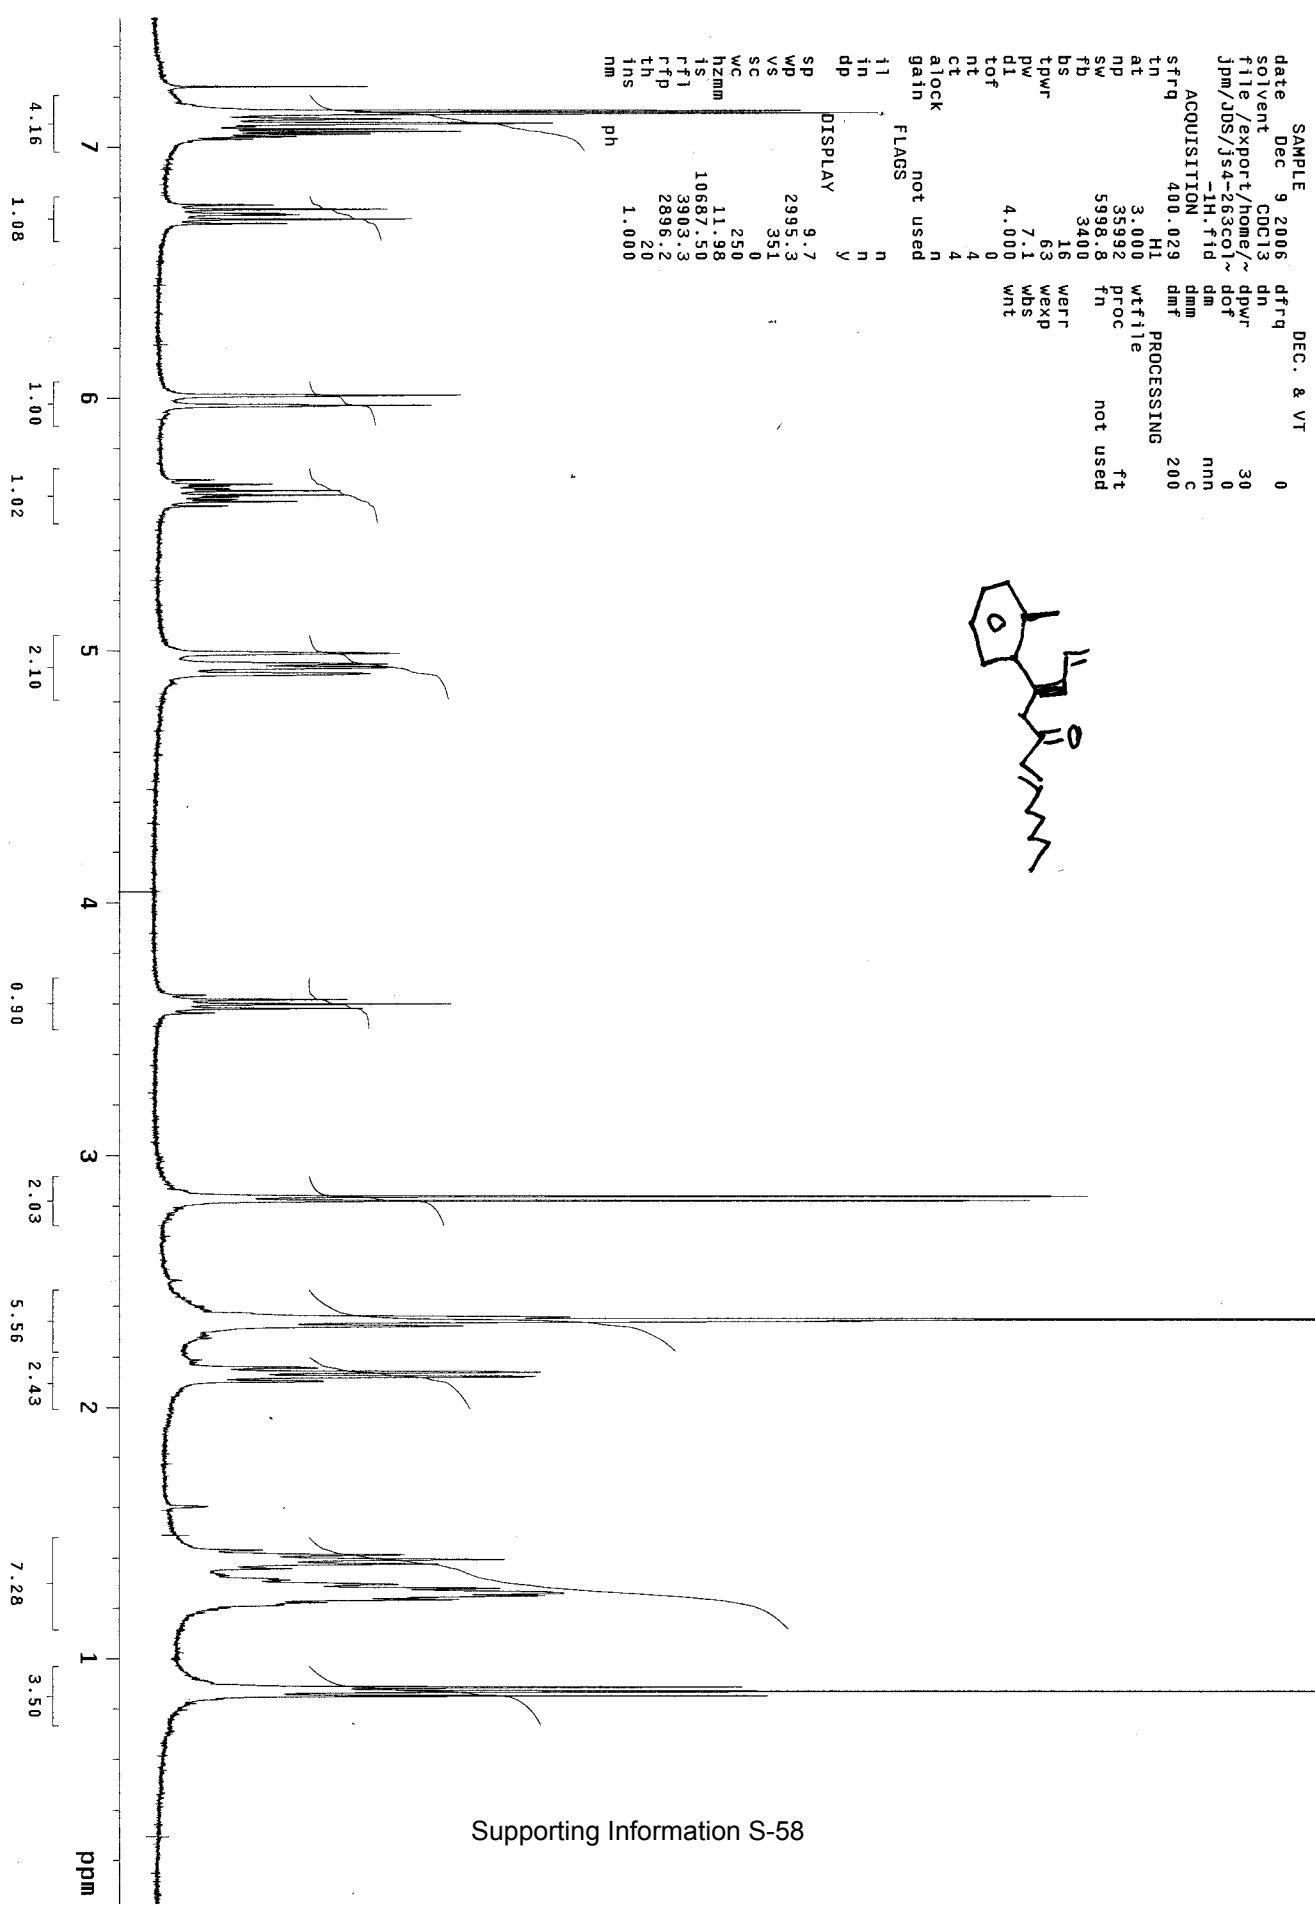

js4-263col-13C

exp2 std13c

SAMPLE Dec 9 2006 DEC. & VT 400.029  
 CDC13 HI  
 solvent exp dpwr 45  
 title ACQUISITION dof 0  
 strfq 100.599 dm dmm VVV  
 tn C13 dmf W  
 at 0.640 dmf 8617  
 np 32876  
 SW 25683.4 lb wtfile  
 fb 14200 proc not used  
 ds 16 ft  
 tpwr 5.7  
 pw 8.7  
 dl 4.000 werrf  
 tof 2271.7 wexp  
 nt 40000 wbs  
 ct 96 wpt  
 a1ock n  
 gain not used  
 flags  
 i1 n  
 in n  
 dp Y  
 DISPLAY  
 SP -237.2  
 WP 21363.0  
 VS 38  
 SC 0  
 WC 250  
 hzmm 85.45  
 fs 580.00  
 rff1 8825.8  
 rfp 7745.2  
 th 8  
 tns 100.000  
 nm no ph

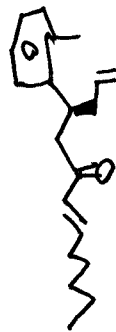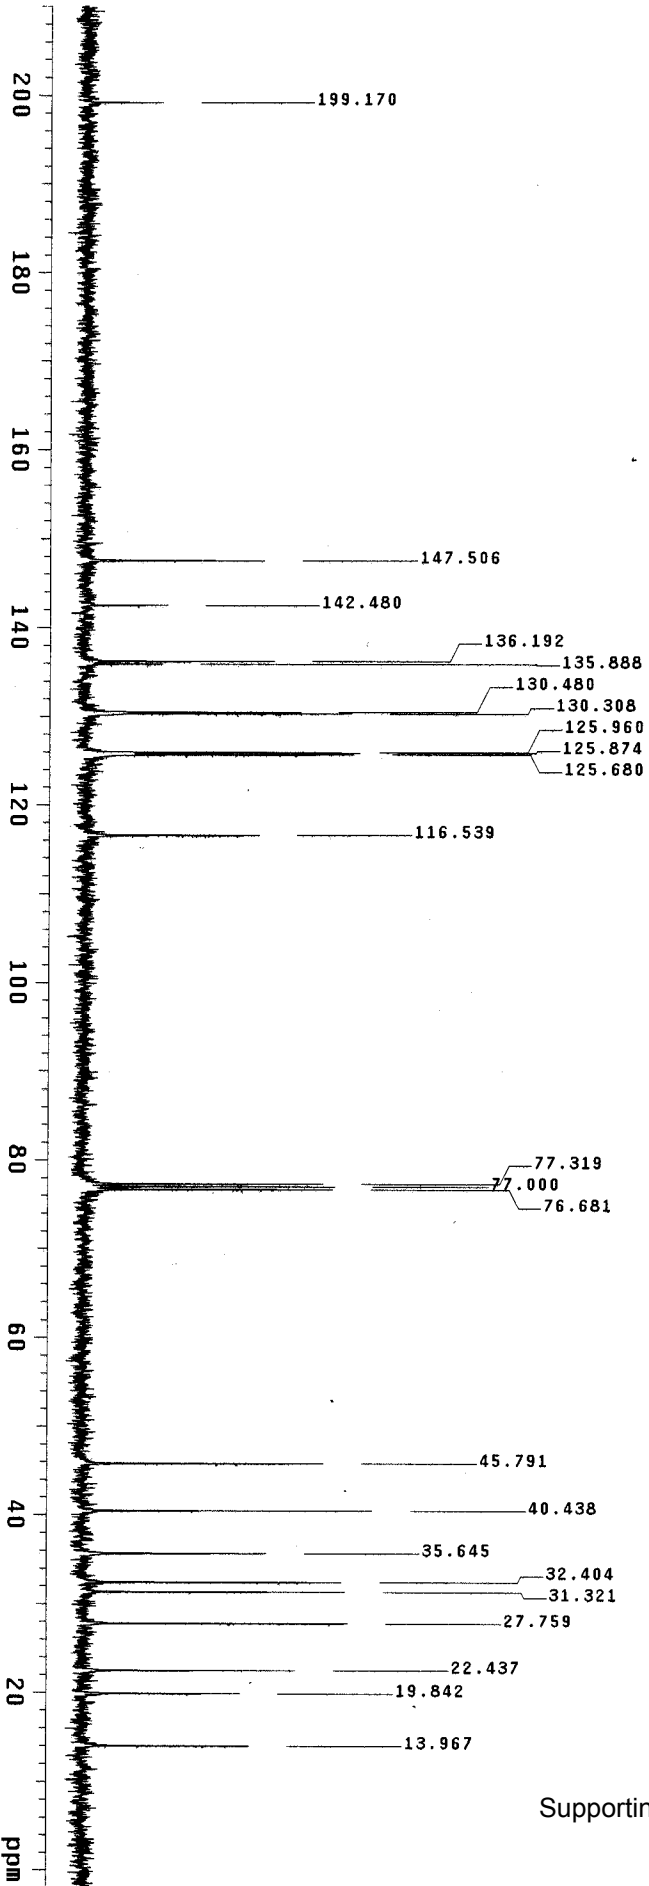



js4-292c01-13c

expi s2pu1

| SAMPLE      |            | DEC. & VT  |          |
|-------------|------------|------------|----------|
| date        | Dec 2 2006 | dfrq       | 499.784  |
| solvent     | CDC13      | dn         | H1       |
| file        | exp        | dpwr       | 39       |
| ACQUISITION |            | dof        | 0        |
| sfrq        | 125.683    | dm         | YVY      |
| tn          | C13        | dmm        | W        |
| at          | 3.000      | dmt        | 11905    |
| np          | 200168     | dseq       |          |
| sw          | 33361.1    | dres       | 1.0      |
| fb          | 18900      | homo       | n        |
| bs          | 4          | temp       | 28.0     |
| tpwr        | 54         | DECC2      |          |
| pw          | 7.0        | dfrq2      | 0        |
| d1          | 2.000      | dn2        |          |
| tof         | 818.6      | dpwr2      | 1        |
| nt          | 400000     | dot2       | 0        |
| ct          | 376        | dm2        | n        |
| atock       | n          | dmm2       | c        |
| gain        | not used   | dmt2       | 10000    |
| flags       |            | dseq2      |          |
| ii          | n          | dres2      | 1.0      |
| in          | n          | homo2      | n        |
| dp          | Y          | PROCESSING |          |
| hs          | nn         | lb         | 2.00     |
| DISPLAY     |            | wfile      |          |
| sp          | -95.6      | prqc       | ft       |
| wd          | 26522.0    | fn         | not used |
| vs          | 111        | math       | f        |
| sc          | 0          |            |          |
| wc          | 250        | werr       |          |
| hzmm        | 106.09     | wexp       |          |
| ts          | 500.00     | wbs        |          |
| rfl         | 13630.1    | wnt        |          |
| rffp        | 9676.6     |            |          |
| th          | 8          |            |          |
| ins         | 100.000    |            |          |
| nm          | cdc        |            |          |
| ph          |            |            |          |

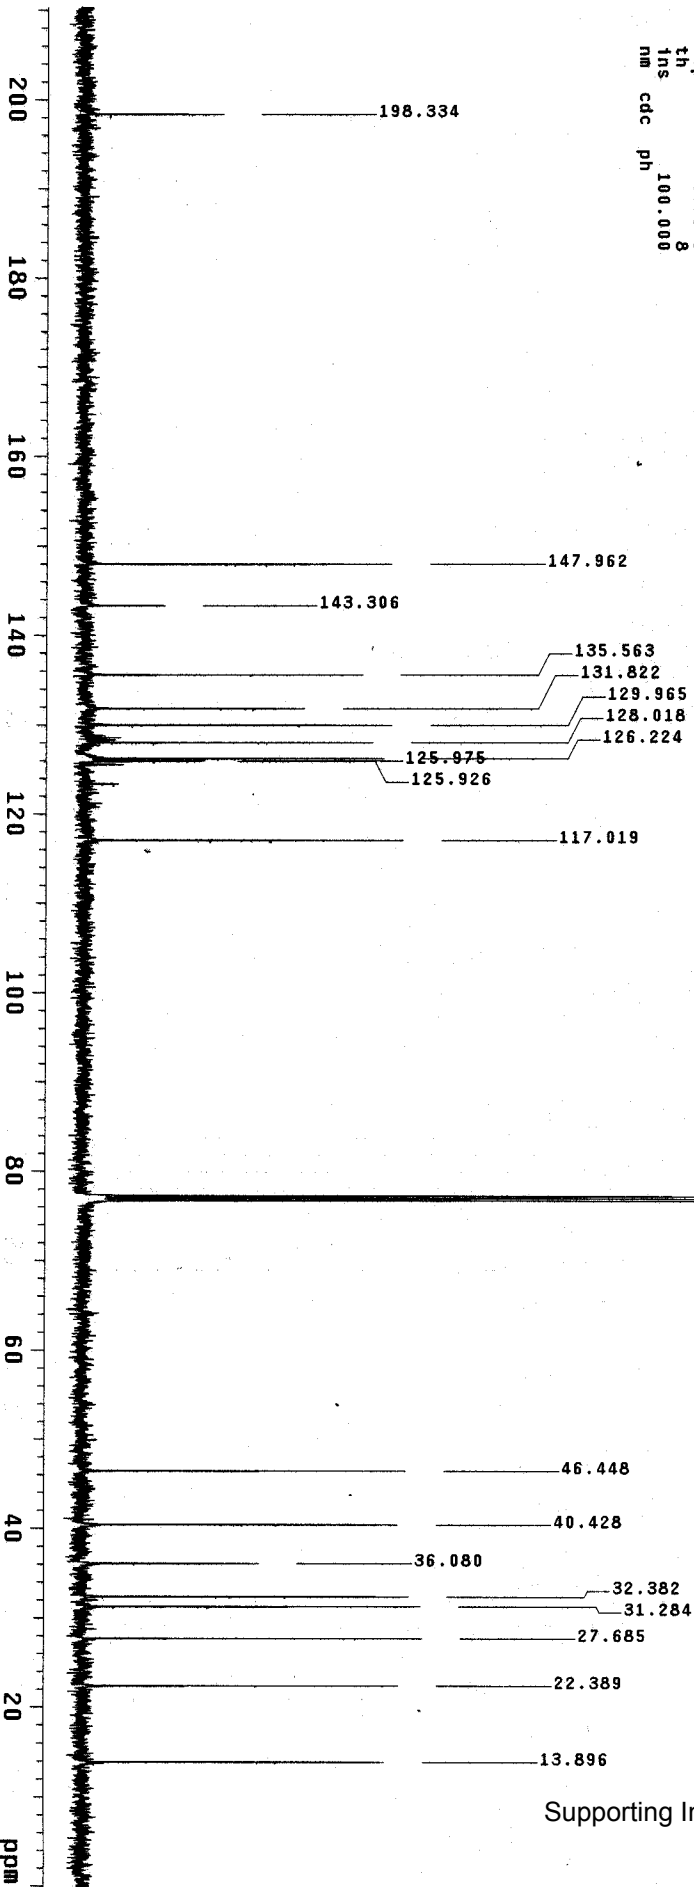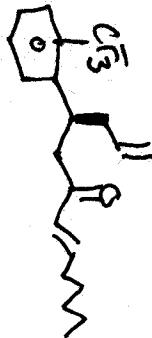

js5-1c01maj

exp1 s2pu1

SAMPLE Dec 2 2006 DEC. & VT 499.784  
 solvent CDC13 dn H1  
 file exp dpwr 30  
 ACQUISITION dof 0  
 sfrq 499.784 dm mnn  
 tn H1 dmm c  
 at 5.000 dmf 200  
 np 70058 dseq  
 sw 7005.9 dres 1.0  
 fb 4000 homo n  
 bs 4 temp 28.0  
 tpwr 56 DEQC  
 pw 4.6 dfrq2 0  
 dl 4.000 dn2  
 tof 497.0 dpwr2 1  
 nt 16 dot2 0  
 ct 0 dm2 n  
 alock n dmm2 c  
 gain not used dmf2 200  
 , FLAGS dseq2  
 i1 n dres2 1.0  
 in n homo2  
 dp y wfile PROCESSING  
 hs nn proc ft  
 DISPLAY -20.5 fn f not used  
 sp 3930.9 math f  
 wd 81 werr  
 vs 81 wexp  
 sc 0 wbs  
 wc 250 wnt  
 hzmm 15.72  
 ts 290.22  
 rff1 4145.3  
 rffp 3618.4  
 th 7  
 ins 1.000  
 nm ph

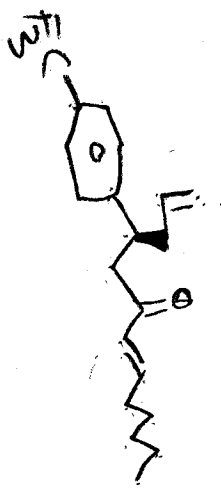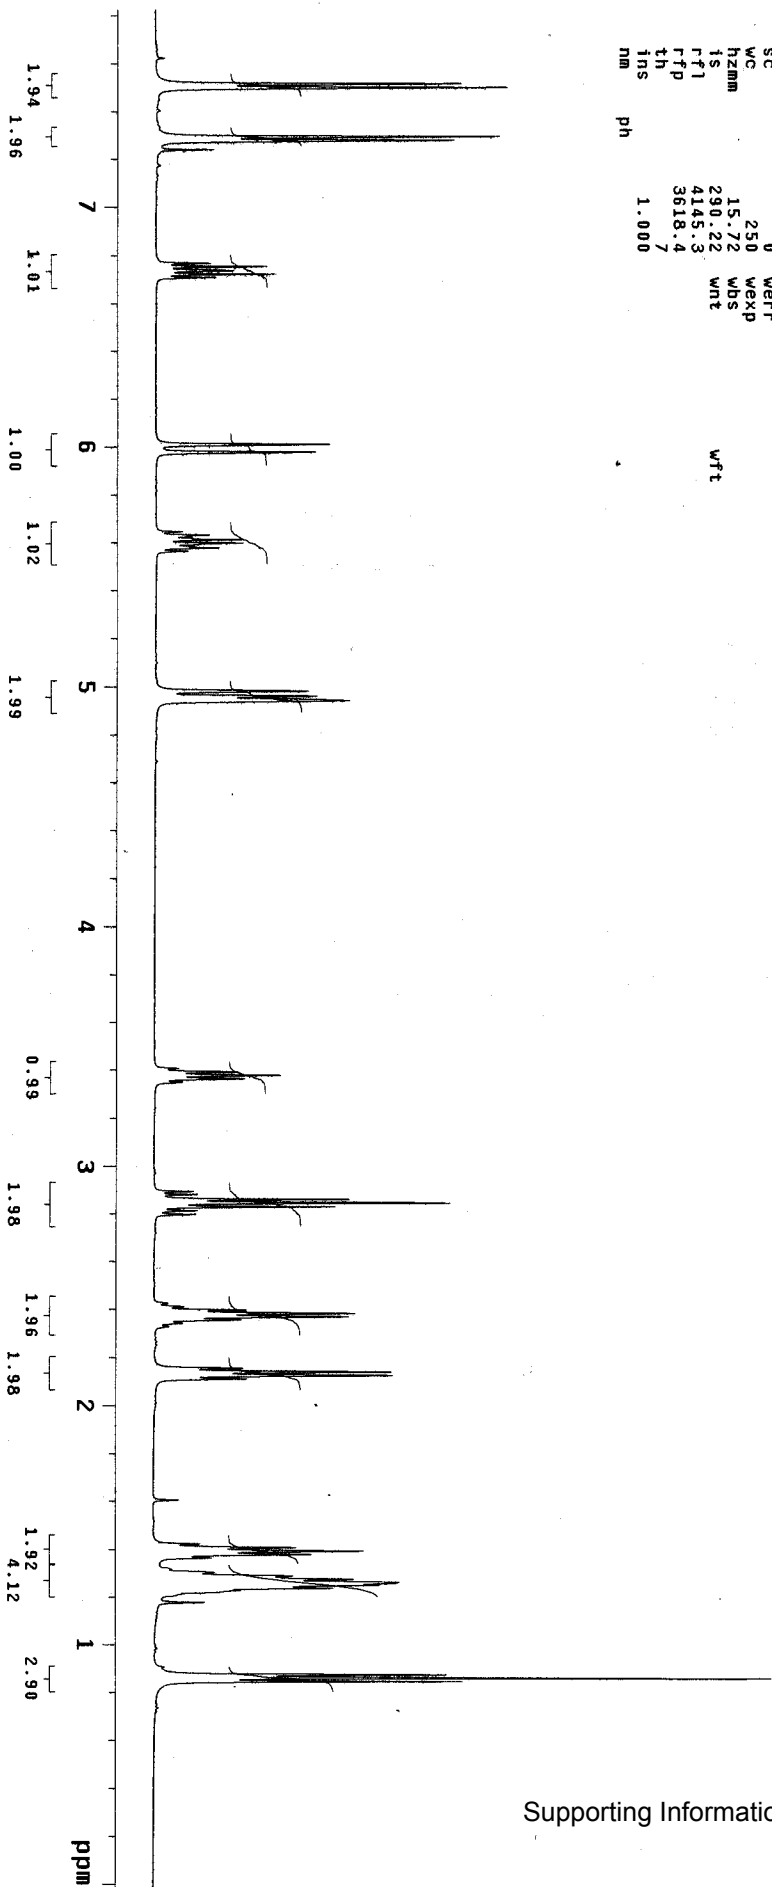

J55-1c01-C

exp2 szpu1

SAMPLE Dec. 5 2006 CDC13 dfrc 499.784  
 solvent CDC13 dn HI  
 file /export/home/~ dpwr 39  
 Jpm/J55-1c01-C.r1d dot 0  
 ACQUISITION  
 srrq 125.684 dmm 11905  
 tn C13 dm VVV  
 at 3.000 dseq W  
 nd 188754 dres 1.0  
 sv 31458.9 homo 1.0  
 fd 17000 temp 28.0  
 bs 16 DEFC2  
 tpwr 54 dfrq2 0  
 pv 7.0 dn2  
 dl 2.000 dpwr2 1  
 tof 2486.7 dot2 0  
 nt 15000 dm2 0  
 ct 15000 dmm2 C  
 alock n dmfr2 10000  
 gain not used dseq2  
 flags not used dres2 1.0  
 i1 n homo2  
 in y  
 dp y  
 hs n  
 DISPLAY nn  
 sp -100.3 wfile 1.00  
 wp 26487.5 proc ft  
 vs 63 fn not used  
 wc 63 math  
 sc 0 werr  
 hzmm 105.95 wexp  
 ls 500.00 wbs  
 rti 11010.8 wnt  
 rfp 9676.6  
 th 6  
 ins 100.000  
 nm cdc ph

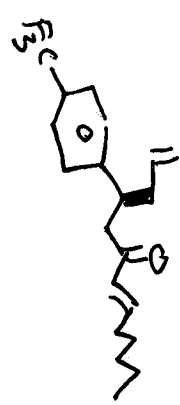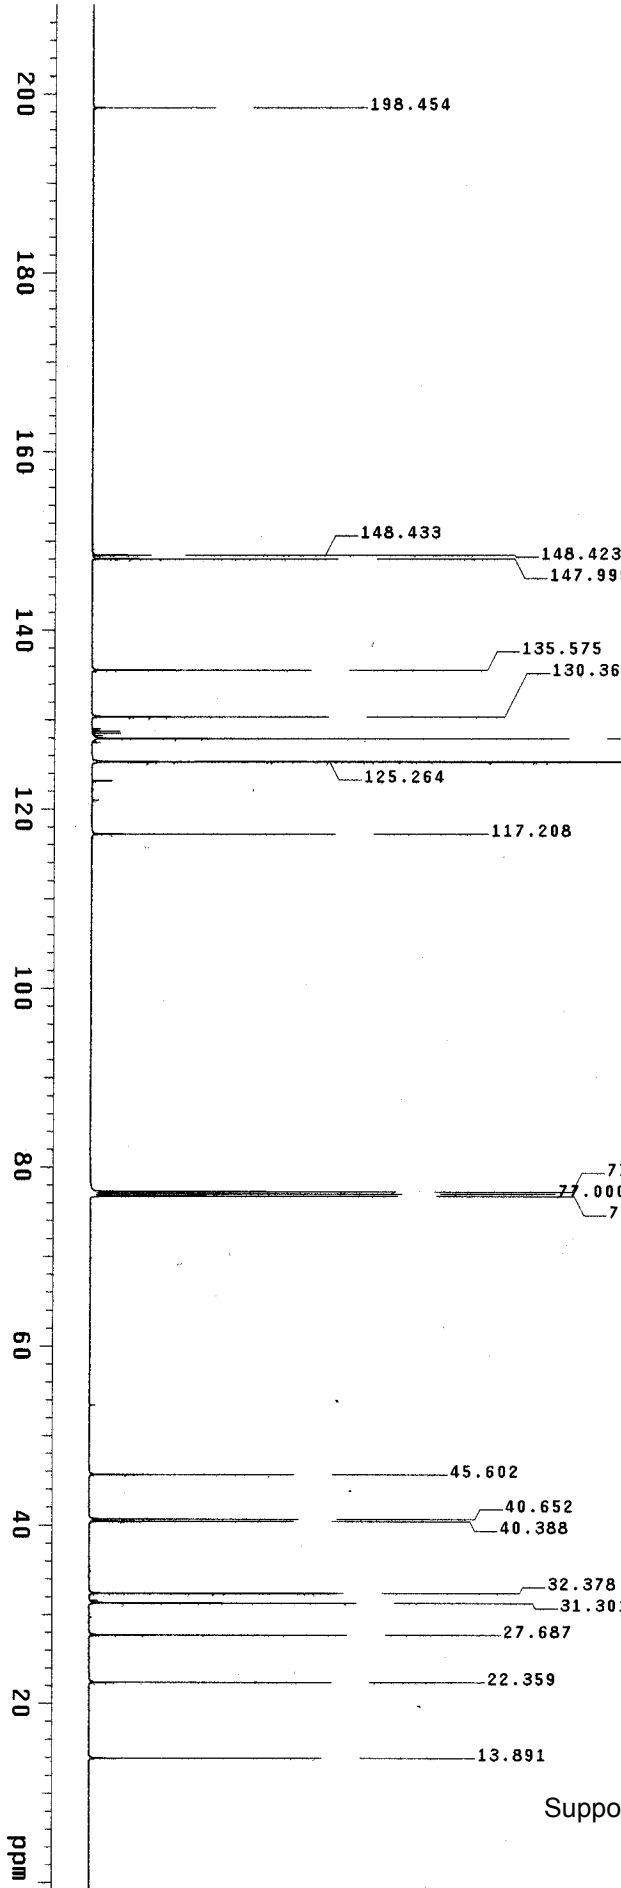

js5-2c01-1H

expt std1h

SAMPLE DEC. & VT

date Dec 22 2006 dfrq 0

solvent CDC13 dn 30

file /export/home/~ dpwr 0

jsm/jds/js5-2c01-1~ dof nnn

H.fid dm c

ACQUISITION dmf 200

sfrq 400.029 dmf

tn H1

at 3.000 wtfile

np 35992 proc

sw 5998.8 fn

fb 3400

bs 4 werr

tpwr 63 wexp

pw 7.1 wbs

di 4.000 wnt

tof 0

nt 16

ct 8

atlock n

gain not used

FLAGS

f1 n

fn n

in n

dp y

DISPLAY

sp 33.3

wp 3003.3

vs 138

sc 0

wc 250

hzmm 12.01

ts 30108.77

rfl 3903.3

rftp 2896.2

th 20

ins 1.000

nm

ph

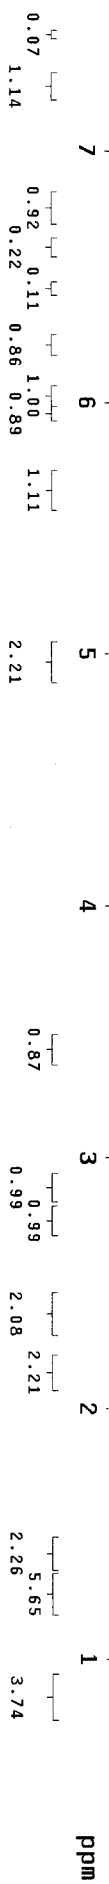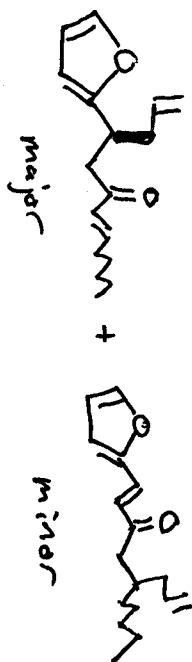



J55-2c01-13C

exp2 std13c

|         |             |        |            |
|---------|-------------|--------|------------|
| date    | Dec 22 2006 | dfreq  | 400.029    |
| solvent | CDCl3       | dn     | H1         |
| title   | ACQUISITION | dpwr   | 45         |
| exp     |             | dof    | 0          |
| dfreq   | 100.599     | dm     | VVY        |
| tn      | C13         | dmm    | W          |
| at      | 0.640       | dmt    | 8617       |
| nd      | 32876       | PROC   | PROCESSING |
| sw      | 25683.4     | lb     | 2.00       |
| fd      | 14200       | wtfile |            |
| ds      | 4           | proc   | not used   |
| tpwr    | 57          | fn     | ft         |
| pw      | 8.7         | verf   |            |
| dl      | 4.000       | wexp   |            |
| tof     | 2271.7      | wbs    |            |
| nt      | 40000       | wnt    |            |
| ct      | 200         |        |            |
| atlock  | not used    |        |            |
| gain    | not used    |        |            |
| il      | n           | flags  |            |
| in      | n           |        |            |
| dp      | y           |        |            |
| DISPLAY |             |        |            |
| SP      | -236.4      |        |            |
| WP      | 21464.1     |        |            |
| VS      | 90          |        |            |
| SC      | 0           |        |            |
| WC      | 250         |        |            |
| h2amm   | 85.86       |        |            |
| ts      | 500.08      |        |            |
| rfi     | 8825.0      |        |            |
| rtp     | 7745.2      |        |            |
| th      | 4           |        |            |
| ins     | 100.000     |        |            |
| nm      | no          | ph     |            |

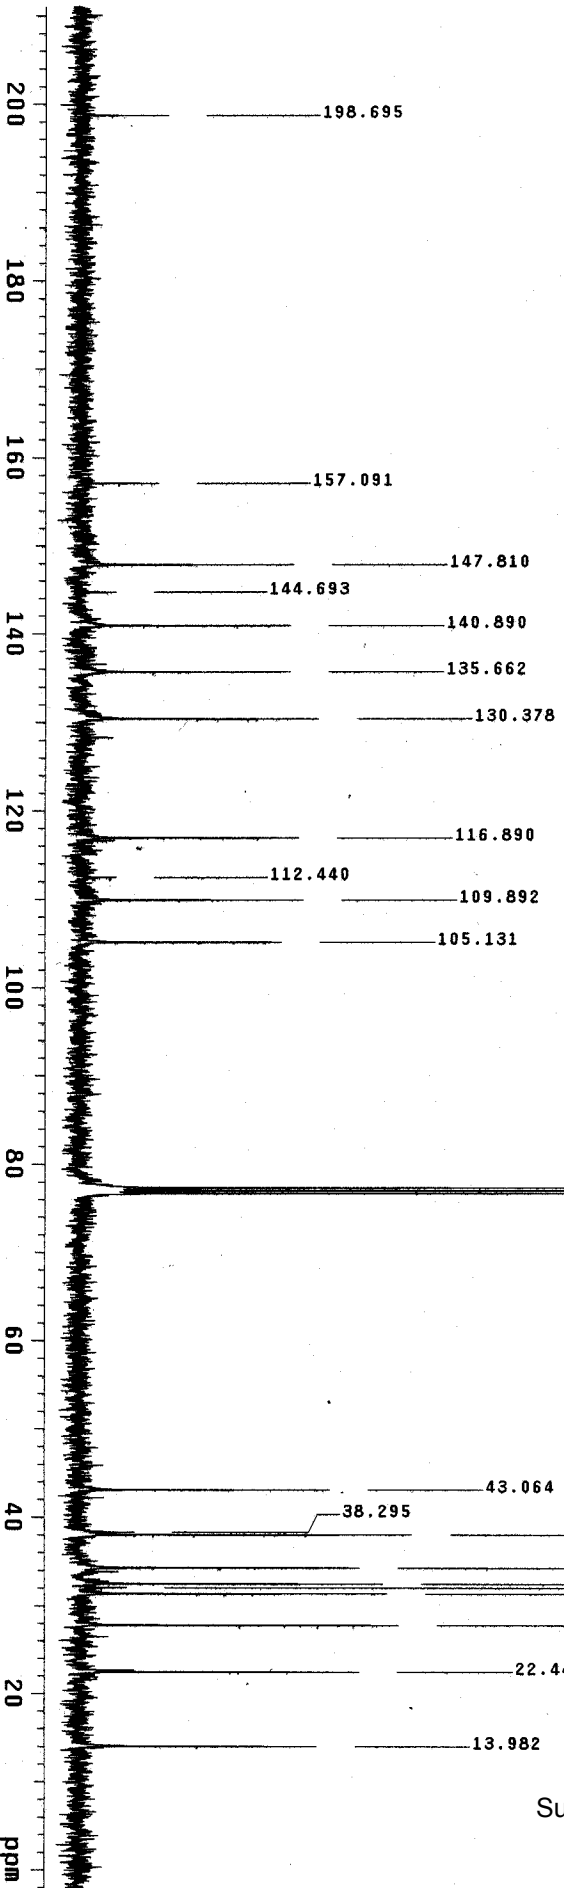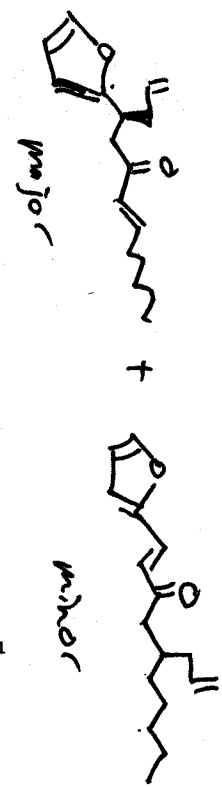

js4-273co1-1H

expl stdih

SAMPLE DEC. & VT

date Dec 11 2006 dfrq 0

solvent CDCl3 dn 30

file /export/home/~ dpwr 0

jpm/jds/js4-273co1~ dot nnn

-1H.fid dm c

ACQUISITION dmm 200

sfreq 400.029 dmf

PROCESSING

at 3.000 wfile ft

np 3592 proc not used

sw 5998.8 fn

bs 3400

tpwr 4 werr

pw 7.1 wexp

dl 4.000 wbs

tof 0 wnt

nt 8

ct 8

alock n

gain not used

FLAGS

fl n

in n

dp y

DISPLAY

sp 17.7

wp 2940.2

vs 196

sc 0

wc 250

hzmm 11.76

ts 18632.81

rfl 3903.1

rffp 2896.2

th 20

ins 1.000

nm

ph

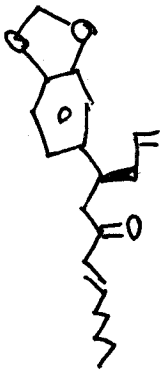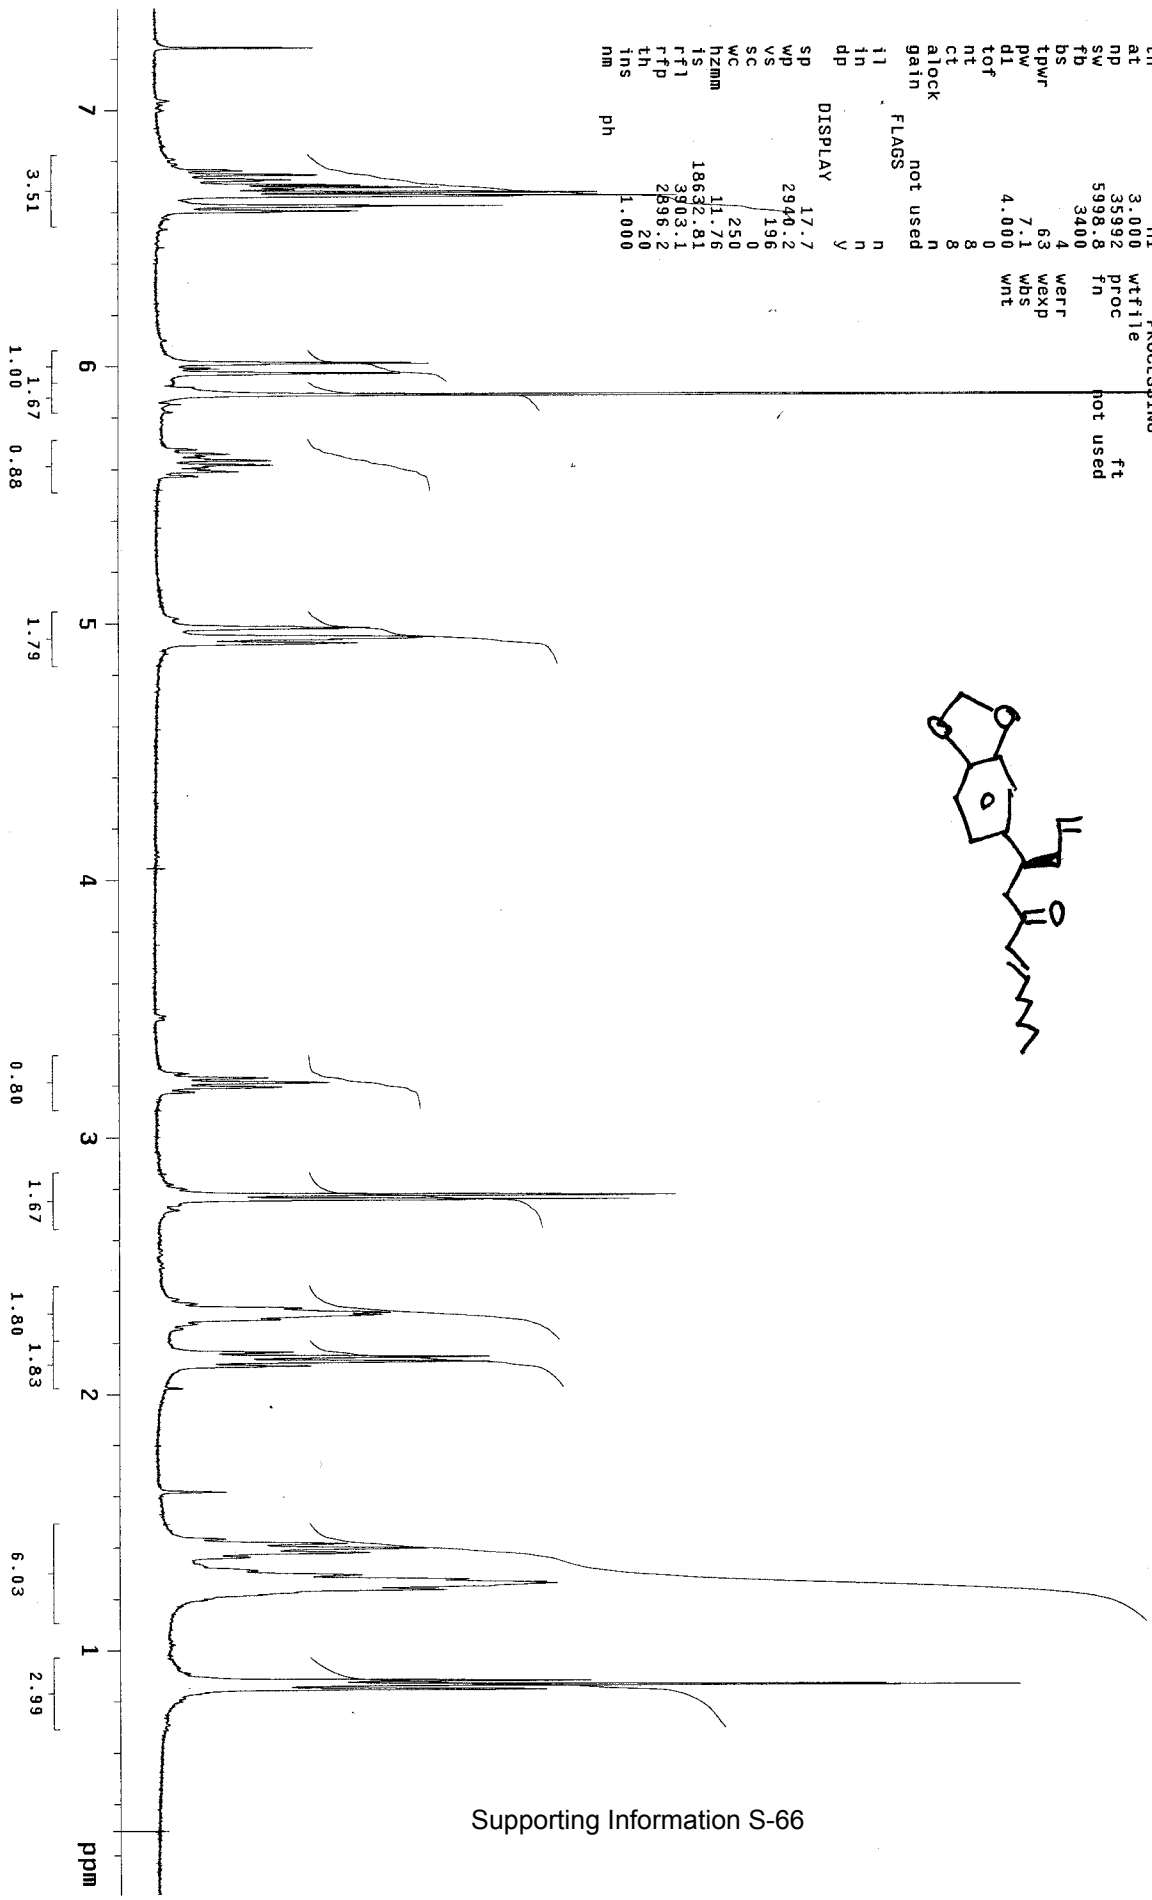

js4-273c01-13C

exp2 std13c

SAMPLE Dec 11 2006 dfrq 400.029  
 solvent CDCl3 dn HI  
 file exp dpr 45  
 ACQUISITION dof 0  
 strq 100.599 dm VVY  
 tn C13 dmm W  
 at 0.640 dmf 8617  
 np 32876 w  
 SW 25682.4 lb wtfile PROCESSING 2.00  
 TD 14200 wfile  
 bs 4 proc not used ft  
 tpwr 57 fn  
 pw 8.7 weff  
 dl 4.000 wexp  
 tof 2271.7 wds  
 nt 40000 wds  
 ct 168 wnt

alock not used  
 gain not used  
 flags not used  
 i1 n  
 in n  
 dp y  
 DISPLAY  
 sp -169.8  
 wp 21329.3  
 vs 84  
 sc 0  
 wc 250  
 hzmm 85.32  
 ls 500.00  
 ftl 8825.8  
 rfp 7745.2  
 th 7  
 ins 100.000  
 nm no ph

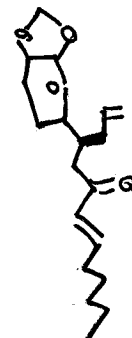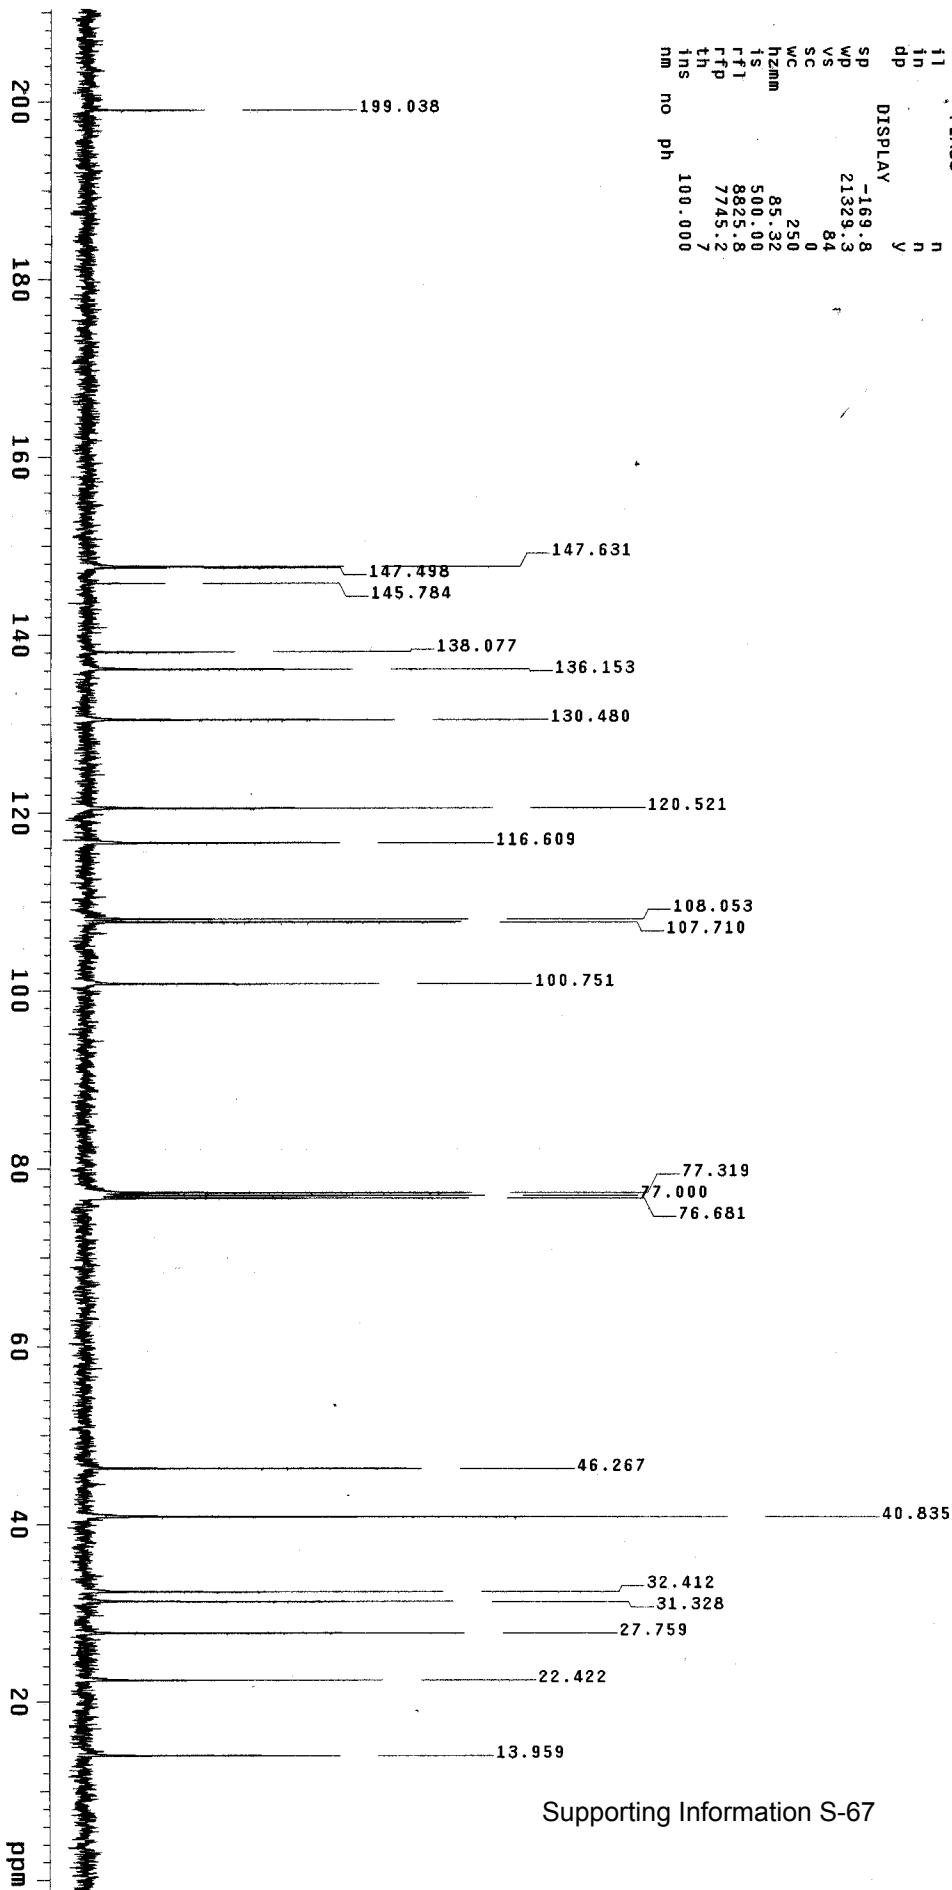

js4-280c01-1H

expt std1h

SAMPLE DEC. & VT 0  
date Dec 22 2006 dfrq 0  
solvent CDCl3 dn  
file /export/home/~ dpwr 30  
jpm/jds/js4-280c01~ dof 0  
-1h.fid dm nnn  
ACQUISITION dmm c  
sfrq 400.029 dmf 200

PROCESSING  
tn H1  
at 3.000 wffile  
np 35992 proc ft  
sw 5998.8 fn not used  
fb 3400  
bs 4 weff  
tpwr 63 wexp  
pw 7.1 wds  
di 4.000 wnt

not used  
alock n  
gain n  
ct 8  
nt 8  
nt 8  
di 0  
tof 0  
pw 7.1  
di 4.000  
wnt

FLAGS  
i1 n  
i1 n  
in n  
dp y  
DISPLAY  
SP 17.2  
WP 3168.8  
VS 126  
SC 0  
WC 250  
hzmm 12.68  
ts 3859.34  
rfl 3903.5  
rffp 2896.2  
th 4  
ins 1.000  
nm

ph 1.000

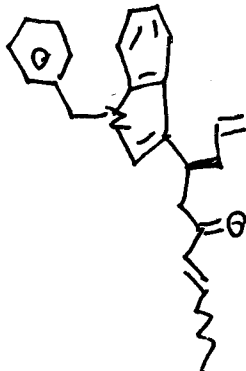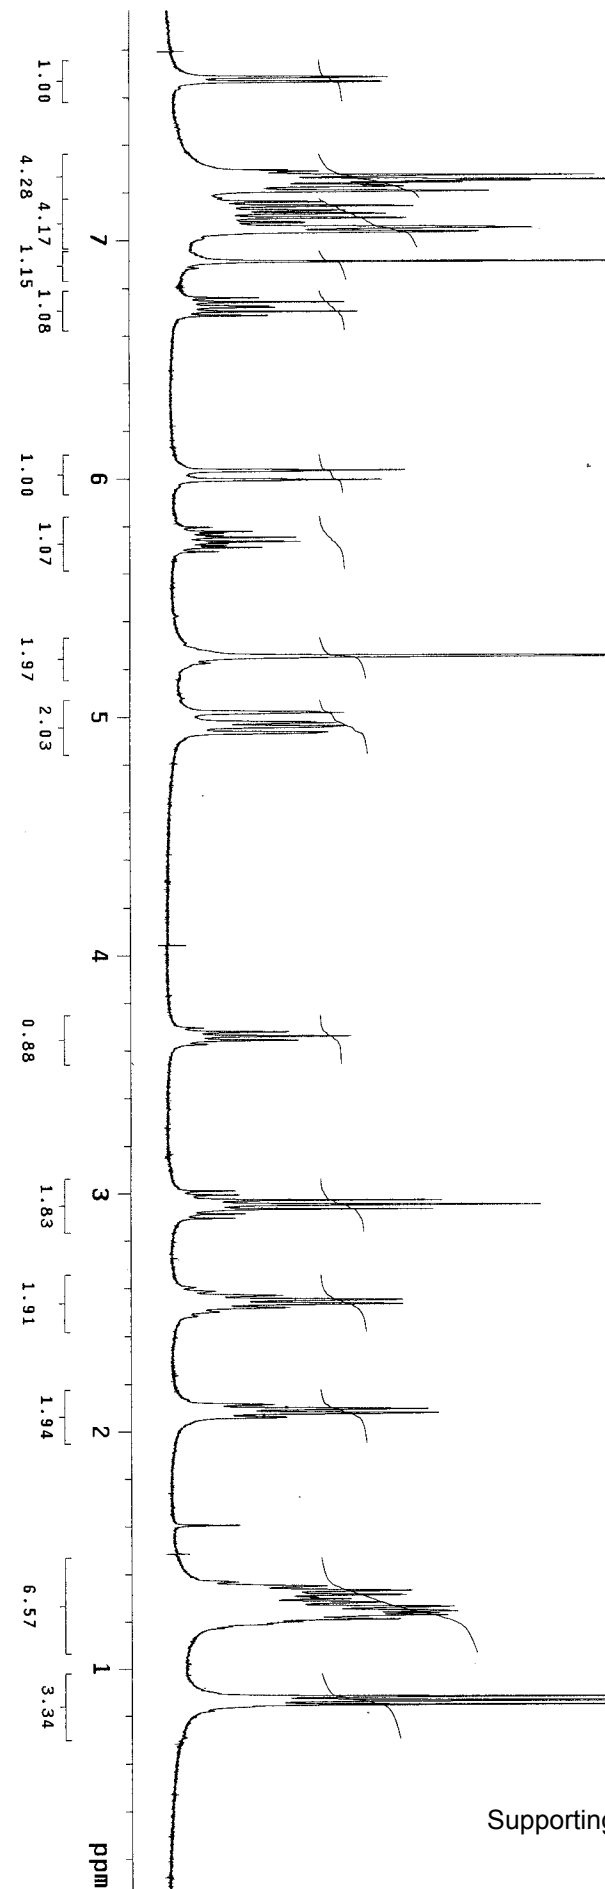

J54-280C01-13C

exp2 std13c

SAMPLE DEC. & VT  
date Dec 22 2006 dfrq 400.029  
solvent CDCl3 dn HI  
file exp dpwr 45  
ACQUISITION dof 0  
sfrq 100.599 dm VVV  
tn C13 dmm W  
at 0.640 dmf 8617  
np 32876 PROCESsing 2.00  
sw 25683.4 lb wtfile ft  
td 14200 proc fn not used  
bs 4  
tdwr 57  
pw 8.7  
dl 4.000 werr  
tof 2271.7 wekp  
nt 4000 WDS  
ct 32 Wnt  
atlock not used  
gain not used  
i1 n  
i2 n  
in y  
dp y  
DISPLAY  
SP -240.4  
WD 21497.8  
VS 41  
SC 0  
WC 250  
h2mm 85.99  
IS 500.00  
rfi 8828.9  
rfp 7745.2  
th 5  
ins no ph 100.000

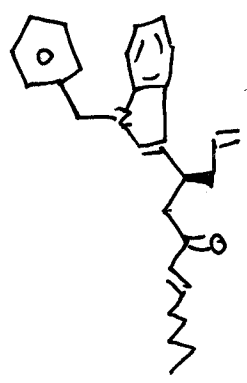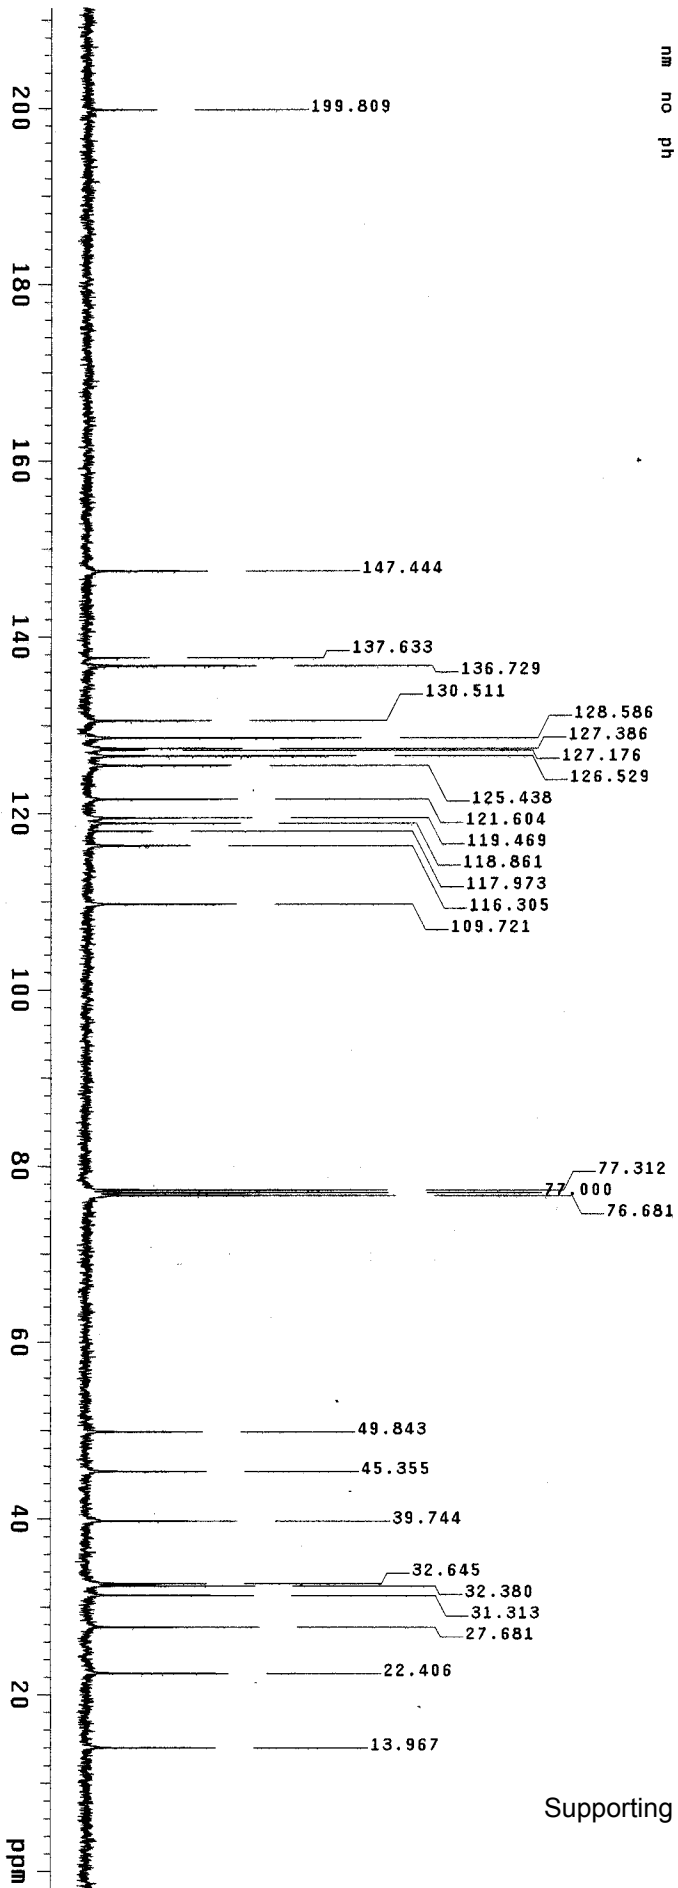

js5-153co1umn

exp2 std1h

SAMPLE DEC. & VT 0

date Mar 26 2007  
solvent CDC13  
file /export/home/~  
jpm/jds/js5-153co1~  
-1h.fid dm mnn  
ACQUISITION dmm C  
sfrq 400.029 dmf 200

PROCCESSING

tn HI  
at 3.000 wffile  
mp 35992 proc ft  
sw 5998.8 fn not used  
fb 3400

bs 4 weff  
tpwr 63 wexp  
pw 7.1 wds  
di 4.000 wnt

gain not used  
alock n  
ct 8  
nt 8  
tof 0

flags not used  
i1 n  
in n  
dp y

DISPLAY  
sp 9.8  
wp 2975.5  
vs 214

sc 0  
wc 250  
hzmm 11.92  
ts 12304.34  
rfi 3903.1  
rffp 2895.2  
th 20  
tms 3.000  
nm ph

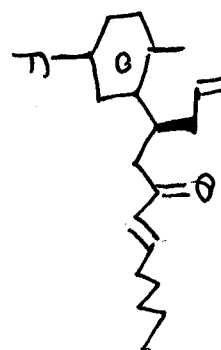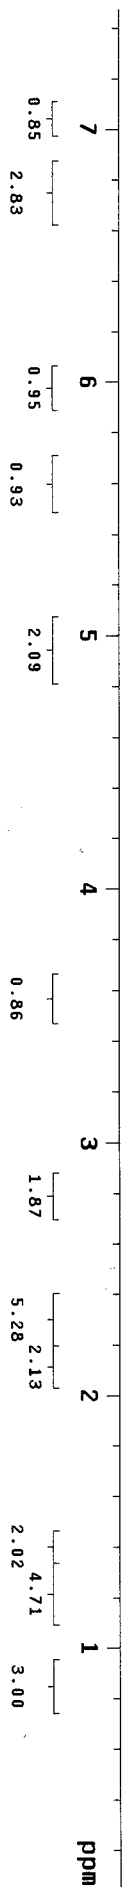

J55-153col1um

exp2 sta13c

SAMPLE DEC. & VT

date Mar 26 2007 dfrc 400.029

solvent CDCl3 dn HI

file /export/home/~ dpwr 45

jpm/J55-153col1 dot 0

-2.fid yyy w

ACQUISITION dmf 8617

sfrq 100.599 C13 PROCESSING 1.00

tn 0.640 lb

at 32876 wtfile

nd 25683.4 proc

sw 14200 fn not used

td 4

bs 57 weff

tpwr 8.7 wexp

pw 4.000 wbs

dl 2271.7 wnt

tof 1600

nt 40

ct 40

atlock not used

gain' not used

il n

in n

dp y

DISPLAY

sp -308.6

wp 22071.6

vs 40

sc 0

wc 250

hzmm 88.29

is 500.00

rfl 8829.7

rtp 7745.2

th 6

ins 100.000

nm no ph

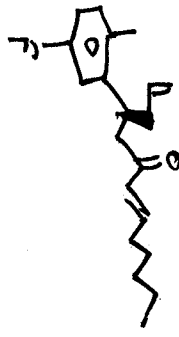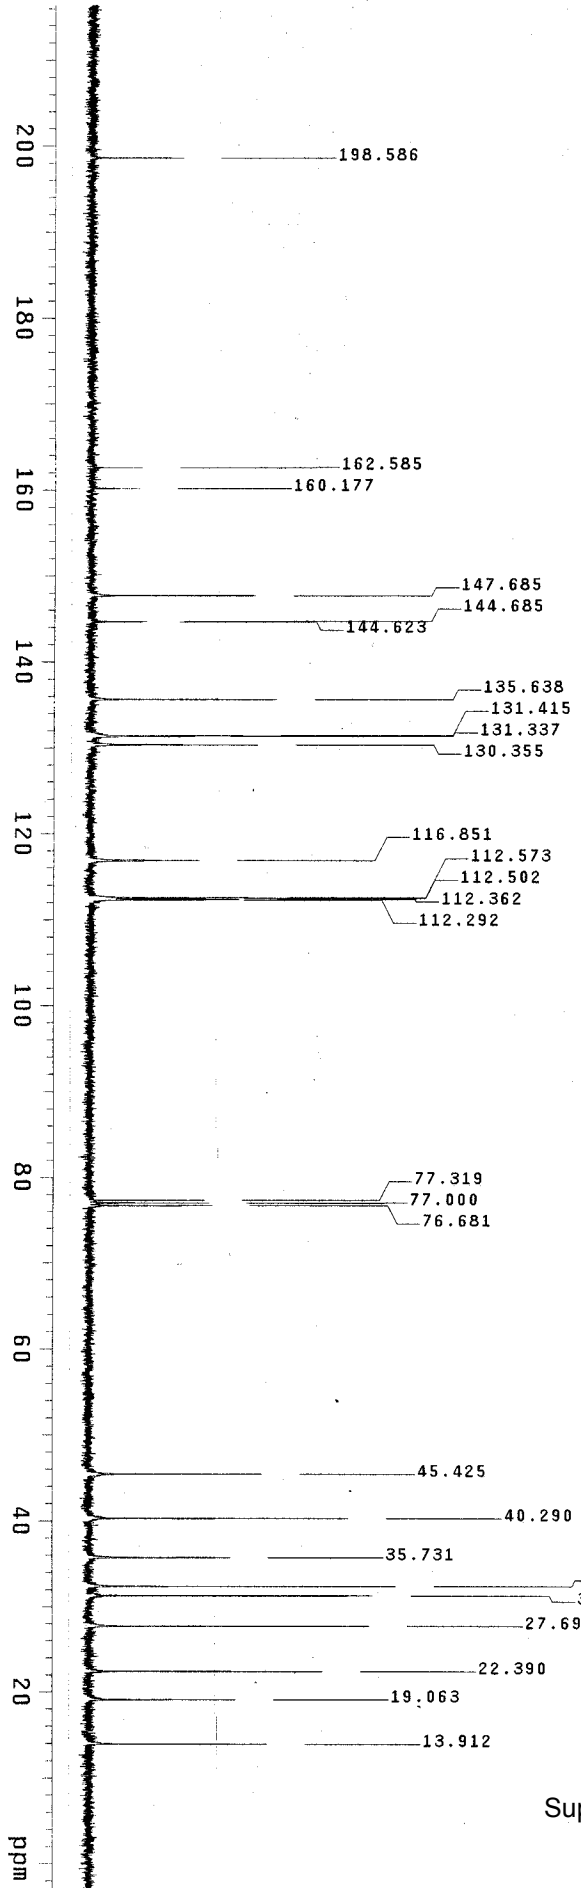

js6-44col1um

exp2 std1h

SAMPLE DEC. & VT  
date Oct 26 2007 dfreq 0  
solvent CDC13 dn 30  
file /export/home/~ dpwr 0  
jpm/jds/js6-44col1-~ dof 0  
full.fid dm nnn  
dmf dmm c  
ACQUISITION 400.029 dmf 200  
HI PROCESSING  
tn 3.000 wffile  
at 35992 proc ft  
np 5998.8 fn not used  
sw 3400  
fd 4 weff  
bs 63 wepp  
tpwr 7.1 wds  
pw 4.000 wnt  
di 0  
tof 0  
nt 8  
ct 8  
atlock n  
gain not used  
FLAGS n  
11 n  
1n n  
dp y

DISPLAY 50.3  
SP 2955.9  
WD 147  
VS 0  
SC 0  
WC 250  
hzm 11.82  
ts 6926.30  
rf1 3902.0  
rfp 2895.2  
th 1.000  
fms  
nm

ph

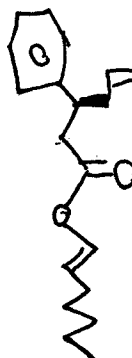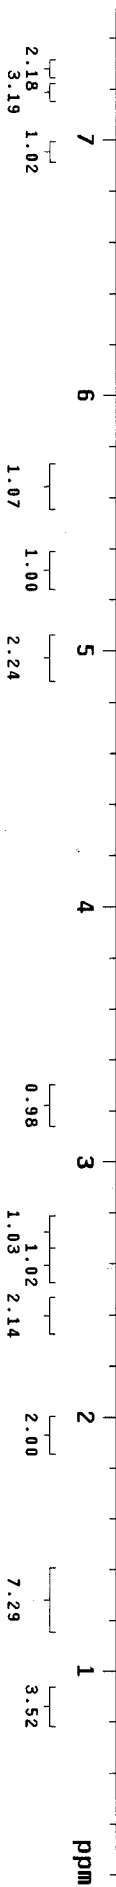



js6-44column

exp4 std13c

```
SAMPLE      date Oct 26 2007      dfrq 400.029      DEC. & VI
solvent      CDC13          dn      H1
file         ACQUISITION exp  dpr      45
sfrq        100.599      dm      0
tn          C13          dmm      0
at          0.640      dmf      yyy
np          32876      lb      8617
sw          25683.4    wffile  W
fb          14200      proc   2.00
bs          4          ft
tpwr        57         tn      not used
pw          8.7        wepr
dl          4.000      wexp
tof         2271.7     wbs
nt          1600      wnt
ct          60
alock       not used
gain        not used
flags       not used
i1          n
in          n
dp          y
display    -135.3
sp          21936.8
wp          81
vs          0
sc          250
wc          87.75
hzmh       500.00
ts         8825.0
rfp        7745.2
th         100.000
ins        nm
```

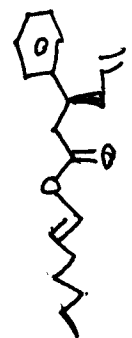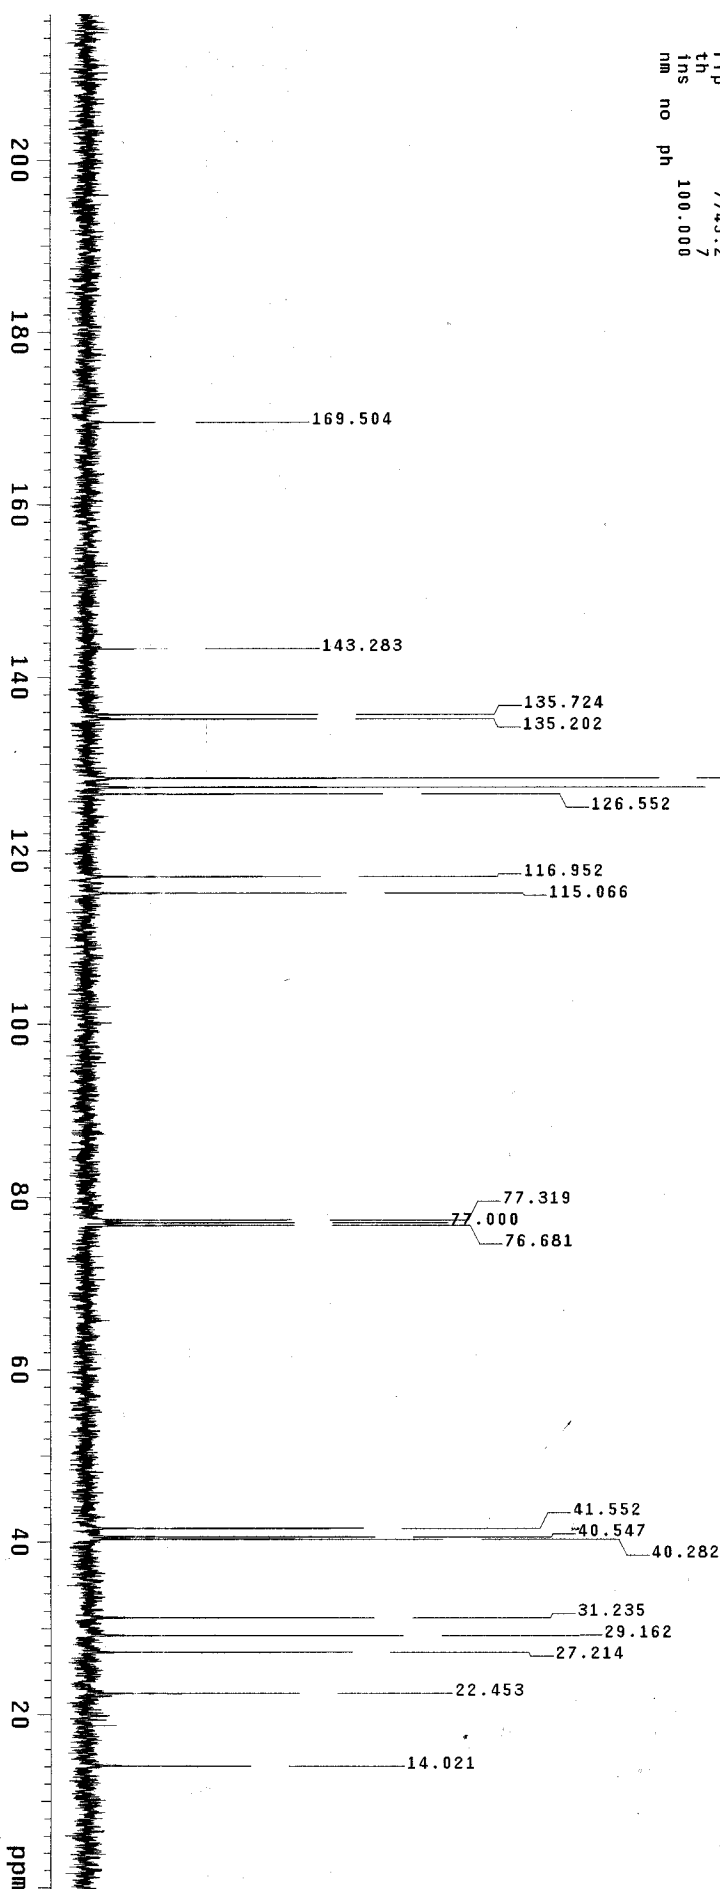

js5-155col1um

expl stdih

SAMPLE Mar 27 2007 DEC. & VT 0  
 date Mar 27 2007 dfrq 0  
 solvent CDC13 dn 30  
 file /export/home/~ dpwr 0  
 jpm/js5-155col1~ dof nnn  
 -1H.fid dm c  
 ACQUISITION dmm 200  
 sfreq 400.029 dmf  
 tn H1  
 at 3.000 wtfile  
 mp 35992 proc ft  
 sw 5998.8 fn not used  
 tb 3400  
 bs 4 werr  
 tpwr 63 wexp  
 pw 7.1 wbs  
 dl 4.000 wnt  
 tof 0  
 nt 8  
 ct 8  
 gain not used  
 flags not used

DISPLAY  
 sp 696.6  
 wp 2262.3  
 vs 201  
 sc 0  
 wc 250  
 hzmm 9.05  
 fs 18457.03  
 rfl 3902.2  
 rfp 2896.2  
 th 20  
 ins 1.000  
 nm

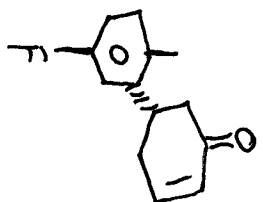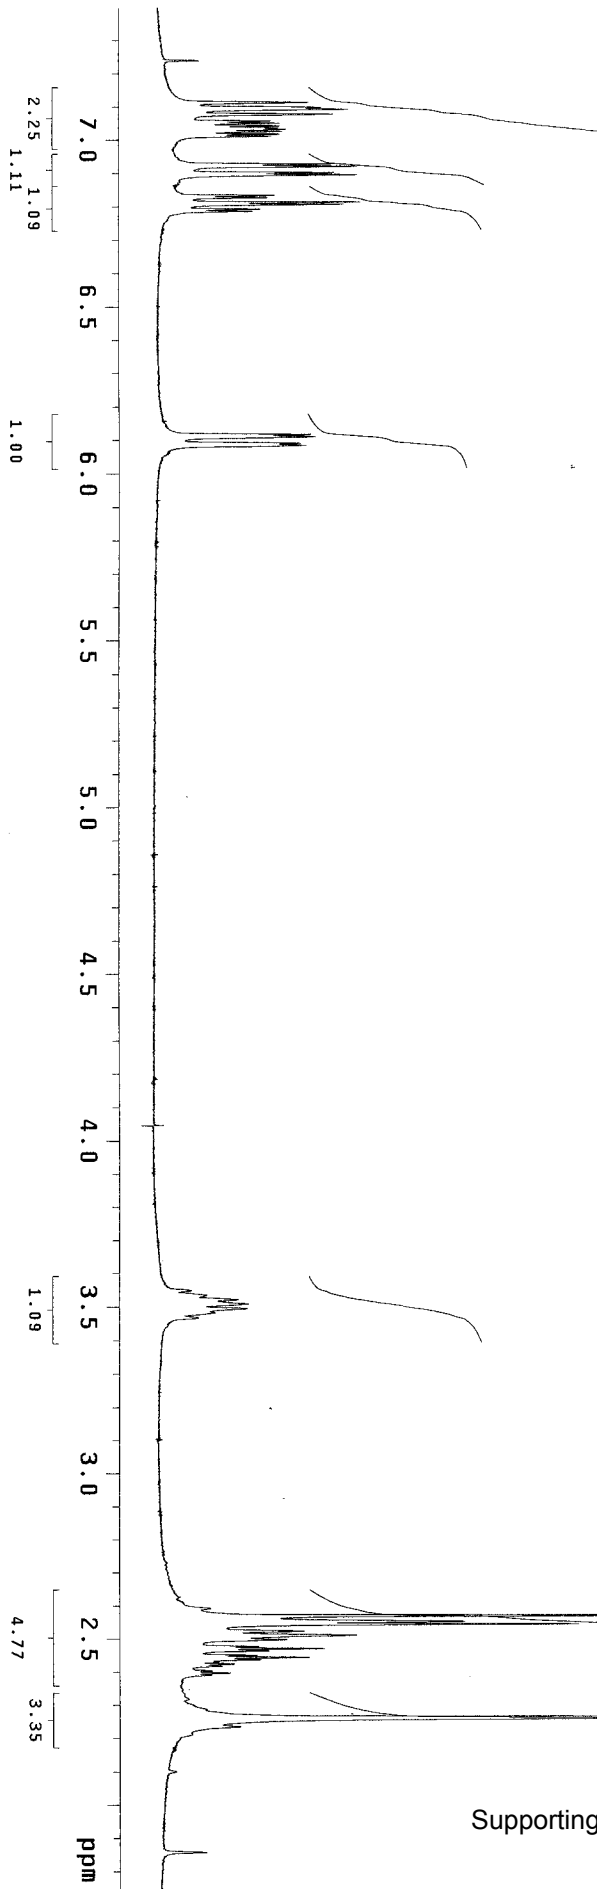

J55-155colunn

expt1 st013c

SAMPLE Mar 27 2007 DEC. & VI 400.029

date Mar 27 2007  
solvent CDCl3  
title /export/home/~  
Jpm/JDS/J55-155col1~  
-13C.ftid

dfreq 400.029  
dn  
dpwr 45  
dm 0  
dmm VVV  
w

ACQUISITION  
sfrq 100.599  
fn C13  
at 0.640  
np 32876  
sw 25683.4  
tb 14200  
bs 4  
tpwr 57  
pw 8.7  
dl 4.000  
tof 2271.7  
nt 1600  
ct 60  
alock n  
gain, not used

PROCESSING 2.00  
dmf 8617  
lb  
wf file  
proc  
fn  
not used  
werr  
wexp  
wbs  
wnt

FLAGS  
i1 n  
in n  
dp Y  
DISPLAY  
SP -176.9  
WP 21768.2  
VS 81  
SC 0  
WC 250  
HZMM 87.07  
IS 500.00  
FTI 8832.9  
FTF 7745.2  
TH 10  
INS 100.000  
nm no ph

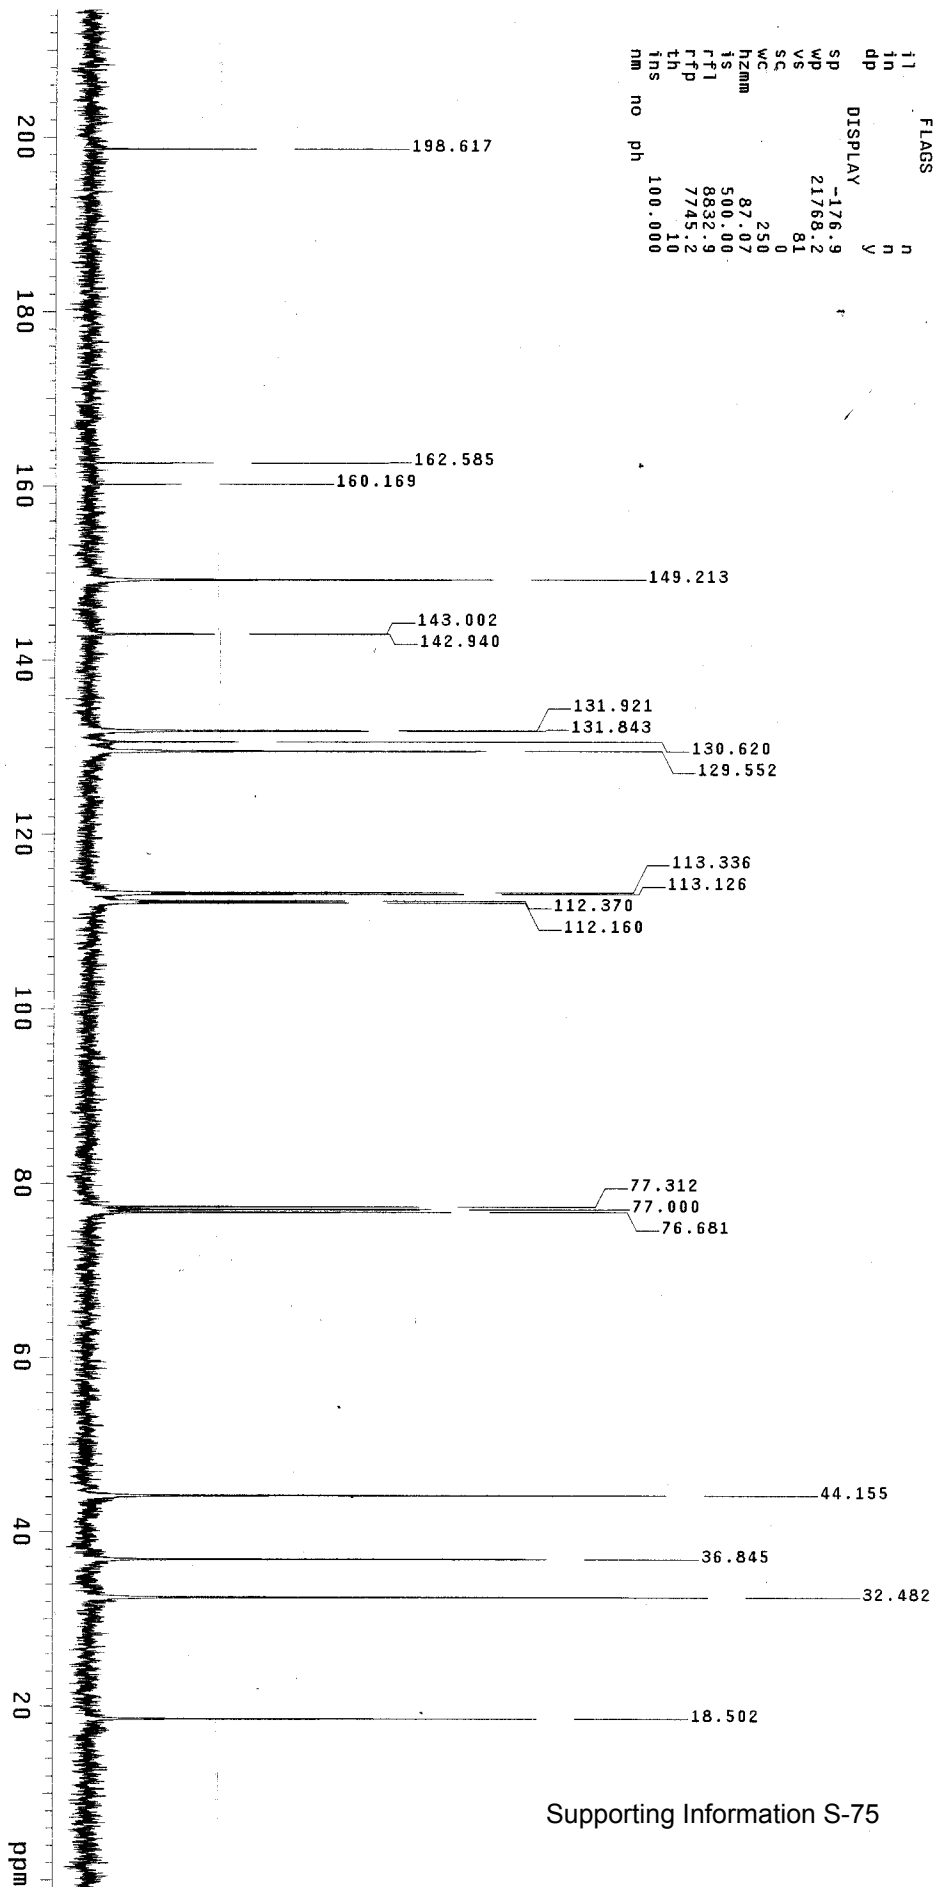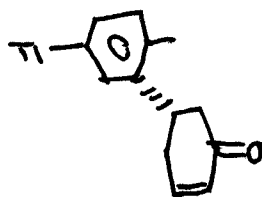

js5-261column

expl stdlh

SAMPLE DEC. & VT

date Oct 9 2007 dfrq 0  
 solvent CDC13 dn 30  
 file /export/home/~ dpwr 0  
 jpm/jds/js5-261col~ dot nnn  
 -full.fid dm C  
 ACQUISITION dmf 200  
 sfrq 400.029  
 tn H1  
 at 3.000 wtf file  
 np 35992 proc not used ft  
 sw 5998.8 fn  
 fb 3400  
 bs 4  
 tpwr 63 wexp  
 pw 7.1 wds  
 dl 4.000 wnt  
 tof 0  
 nt 8  
 ct 8  
 alock not used  
 gain not used  
 flags not used

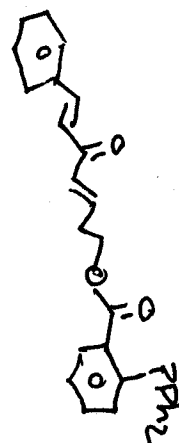

DISPLAY 27.2  
 SD WD 3287.1  
 VS 63  
 SC 0  
 WC 250  
 hzmm 13.15  
 ts 10936.49  
 rftl 3901.5  
 rftp 2836.2  
 th 20  
 ins 1.090  
 nm ph

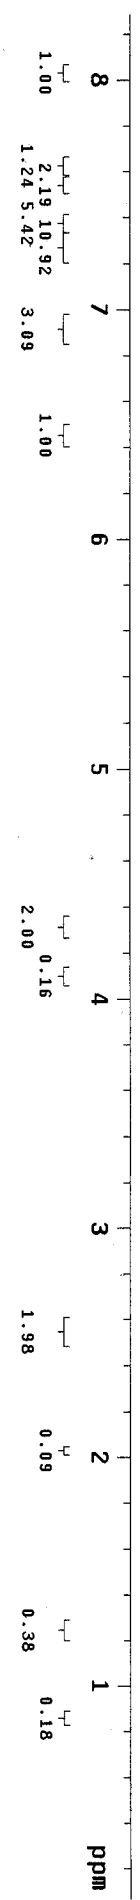

js5-261column

exp2 std13c

SAMPLE DEC. 8 VT 400.029

date Oct 9 2007

solvent CDCl3

file exp

ACQUISITION

sfreq 100.599

tn C13

at 0.640

np 32876

sw 25883.4

fb 14200

bs 4

tpwr 57

pw 8.7

dl 4.000

tof 2271.7

nt 1600

ct 116

alock not used

gain not used

ll n

in n

dp y

DISPLAY 233.8

sp WP 20417.7

vs 101

sc 0

wc 250

hzm 81.67

fs 500.00

ftl 8827.4

rfp 7745.2

th 8

ins no ph 100.000

dfr-q 400.029

dn HI

dpr 45

dof 0

dm VVV

dmm W

dmf 8617

lb PROCESSING 2.00

wfitle ft

fn not used

verf

wexp

wbs

wnt

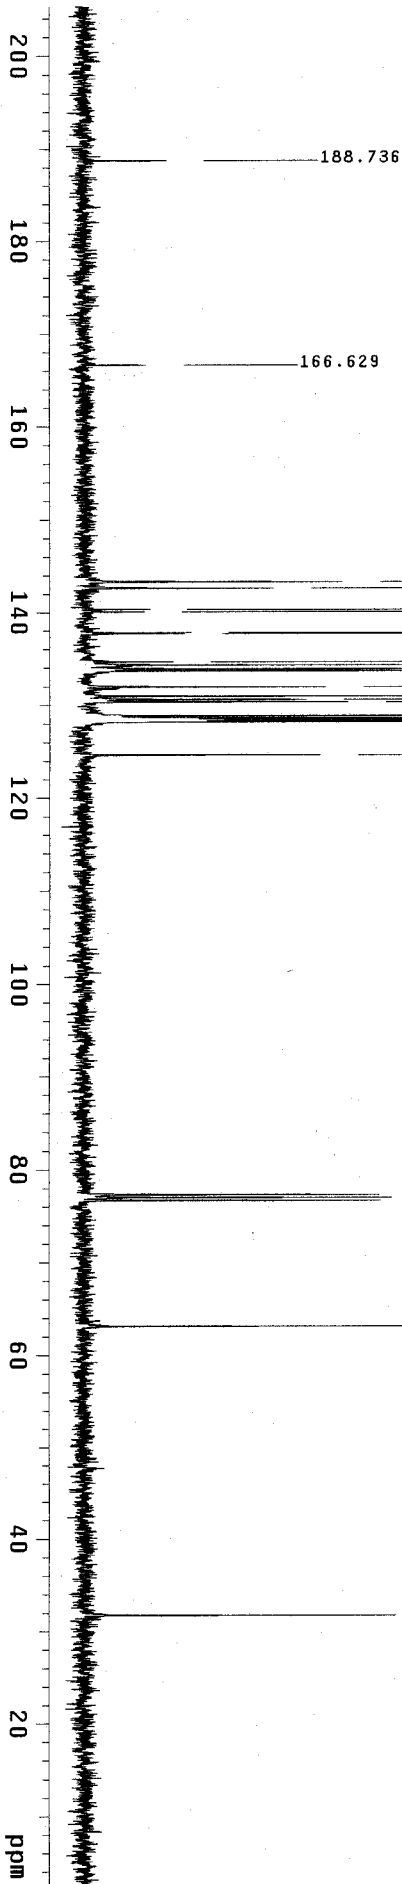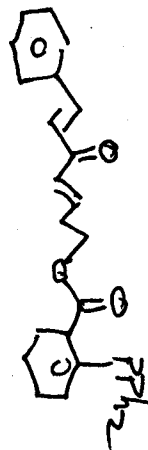

js6-85 column pdt

expi std1h

SAMPLE DEC. & VT 0

date Oct 15 2007 dfrq 30

solvent CDC13 dn 0

file /export/home/~ dpwr 0

jpm/jds/js6-85col1.~ dof mnn

ftid dm c

ftdm dmm

ftc 200

ACQUISITION 400.029 dmf

IN HI

at 3.000 wifile

mp 35992 proc

sw 5998.8 fn not used

fs 3400

bs 4

tpwr 63 wep

pw 7.1 wds

di 4.000 wnt

tof 0

nt 16

ct 12

alock not used

gain not used

11

in n

dp y

DISPLAY

sp 34.7

wd 3239.7

vs 107

sc 0

wc 250

hzmm 12.196

ts 6064.108

rfl 3901.9

rffp 2846.2

th 12

tms 1.000

nm ph

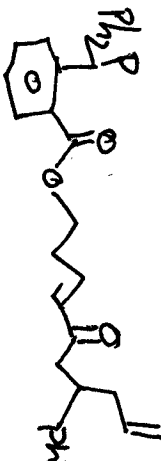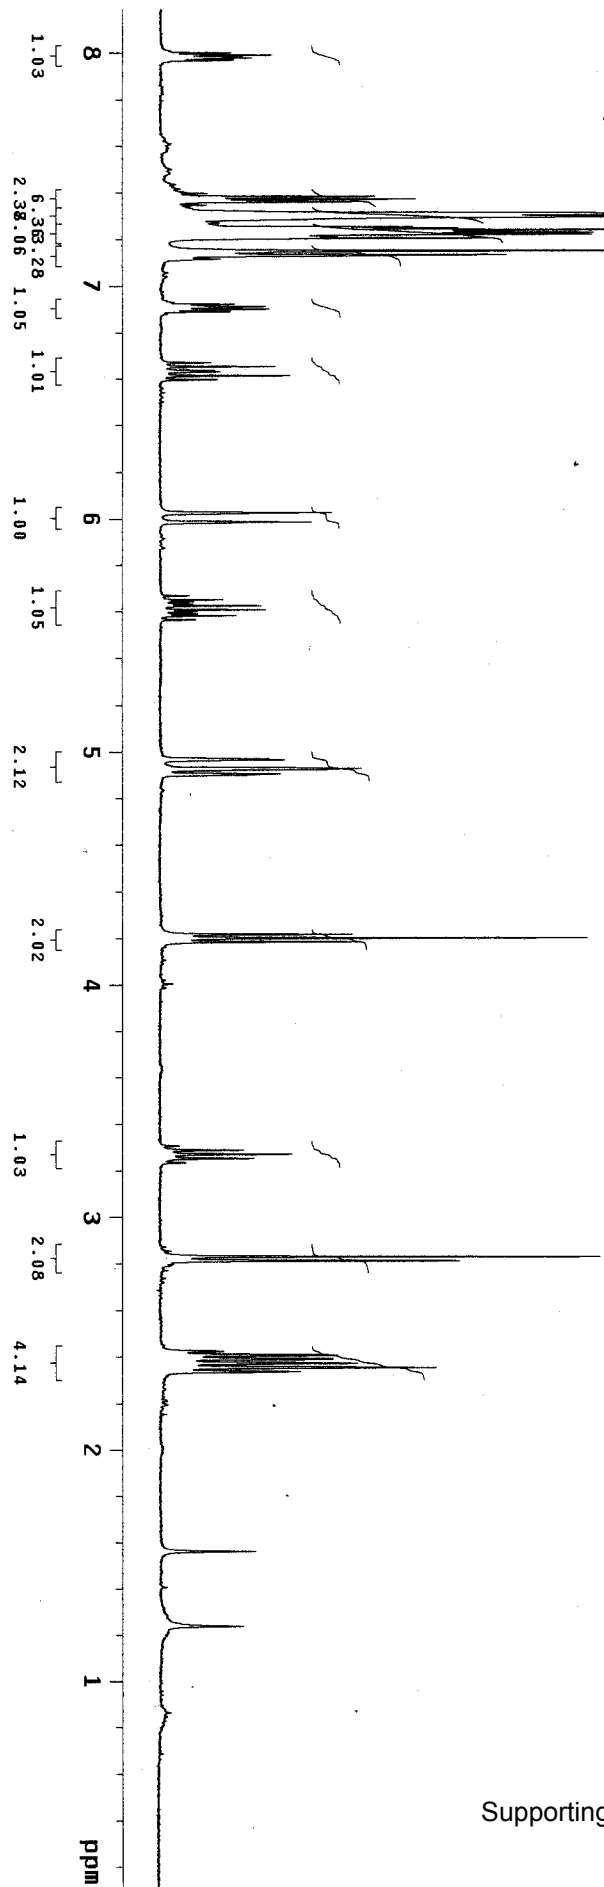

js6-85column.pdt

exp2 std13c

SAMPLE DEC. 8 VI  
date Oct 15 2007 dfrq 400.029  
solvent CDCl3 dn H1  
title ACQUISITION exp dpwr 45  
sfrq 100.599 dm 0  
in C13 dmm VVY W  
at 0.640 dmf 8617  
nd 32876  
sw 25683.4 lb  
fb 14200 wfile  
ds 4 proc  
tpwr 57 ft  
pw 8.7  
dl 4.000 werr  
tof 2271.7 wexp  
nt 1600 wbs  
ct 132 wnt  
atlock n  
gain not used  
flags n  
t1 n  
in n  
dp y

DISPLAY -234.9  
SP WP 21970.5  
VS 98  
WC 250  
SC 0  
hzm 87.88  
ts 500.00  
f1 8823.5  
f2 7745.2  
f3 100.000  
nm no ph

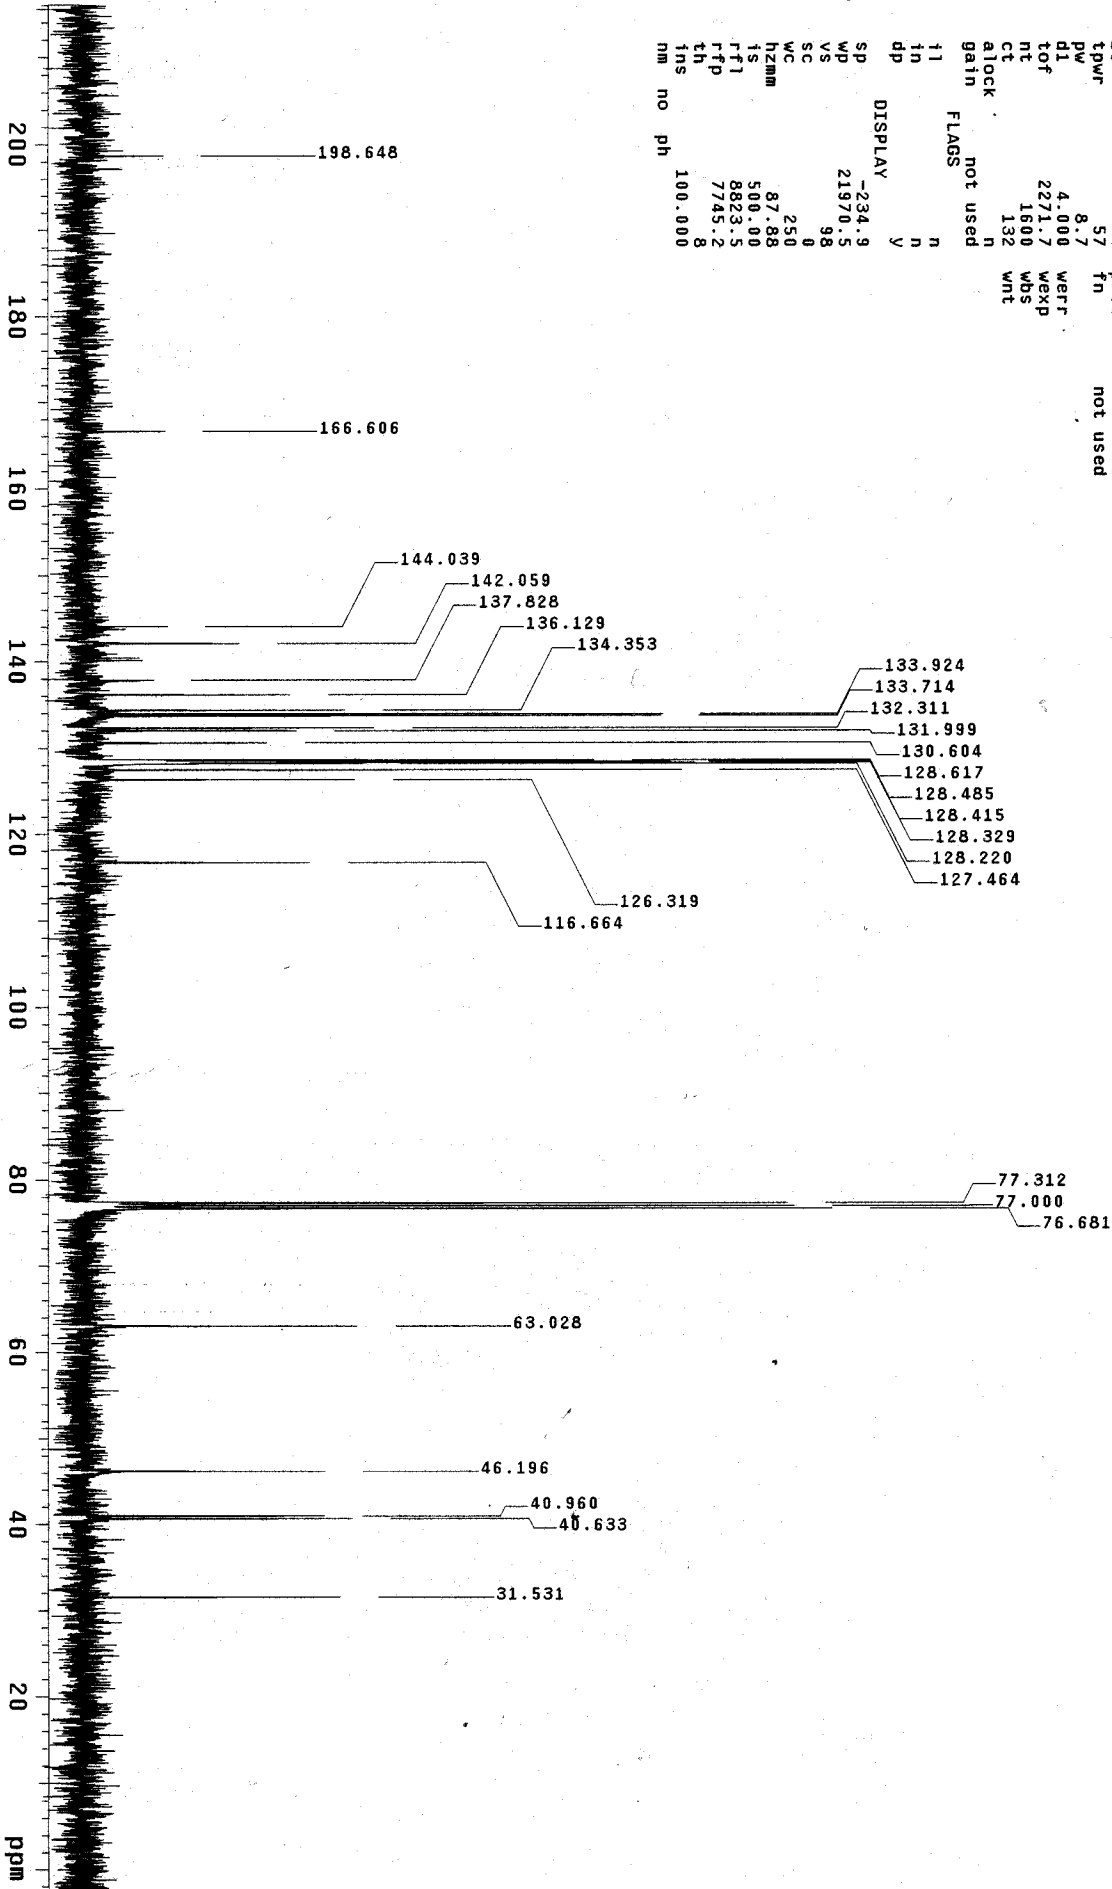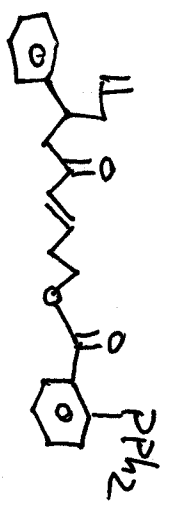

js6-101 column spot 1

expt1 std1h

SAMPLE DEC. & VT 0  
date Oct 26 2007 dfrq  
solvent CDC13 dn  
file /export/home/~ dpwr 30  
jpm/jds/js6-101col1~ dof 0  
SPL.FID dm nnn  
ACQUISITION dmm c  
sfrq 400.029 dmf 200  
PROCESSING  
tn HI  
at 3.000 wfile  
np 35992 proc  
sw 5998.8 fn  
fd 3400  
bs 4 weff  
tpwr 63 wexp  
pw 7.1 wds  
di 4.000 wnt  
tof 0  
nt 16  
ct 16  
atlock not used  
gain not used  
FLAGS  
i1 n  
in n  
dp y

DISPLAY  
SP 82.2  
WD 3247.16  
VS 97  
SC 0  
WC 250  
h2mm 12.199  
IS 12379.109  
rf1 3801.7  
rfp 2896.2  
th 20  
tms 1.0000  
nm ph

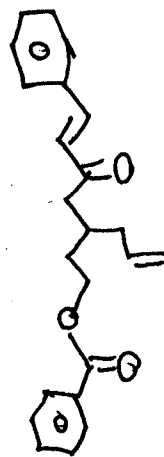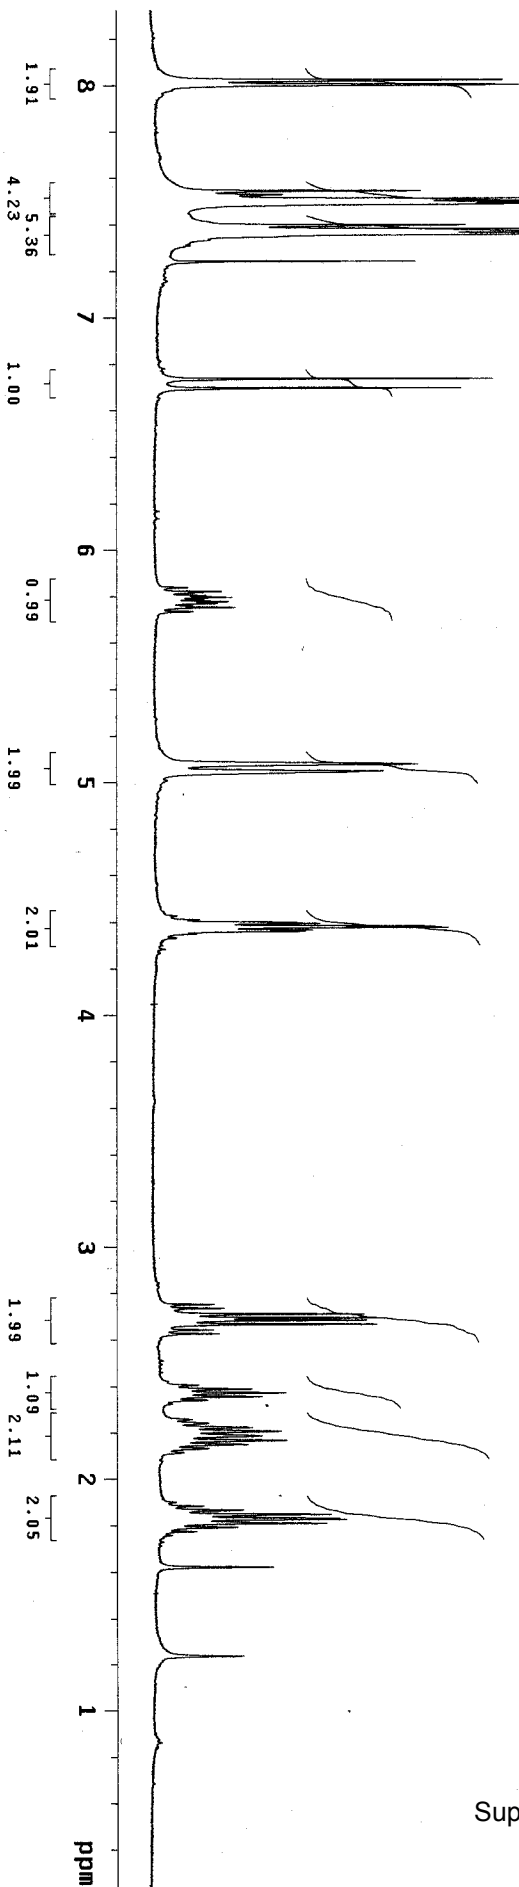



exp2 std13c

SAMPLE DEC. & VT  
 date Oct 26 2007 dfrrq 400.029  
 solvent CDCl3 dn H1  
 file ACQUISITION exp dpwr 45  
 sfrrq 100.599 dm 0  
 tn C13 dmm YVY W  
 at 0.640 dmf 8617  
 np 32876 lb PROCESSING 2.00  
 sw 25683.4 wffile  
 fb 14200 lb  
 bs 57 fn  
 tpwr 8.7 fn not used  
 pw 4.00 weff  
 dl 2271.7 wexp  
 tof 1600 wbs  
 nt 100 wnt  
 ct 100  
 atlock not used  
 gain not used  
 flags  
 i1 n  
 in n  
 dp y  
 DISPLAY -170.6  
 SP WP 22240.9  
 VS 122  
 SC 0  
 WC 250  
 hzmm 88.96  
 fs 500.00  
 ffl 8826.6  
 rfp 7745.2  
 th 3  
 ins no ph 100.000  
 nm

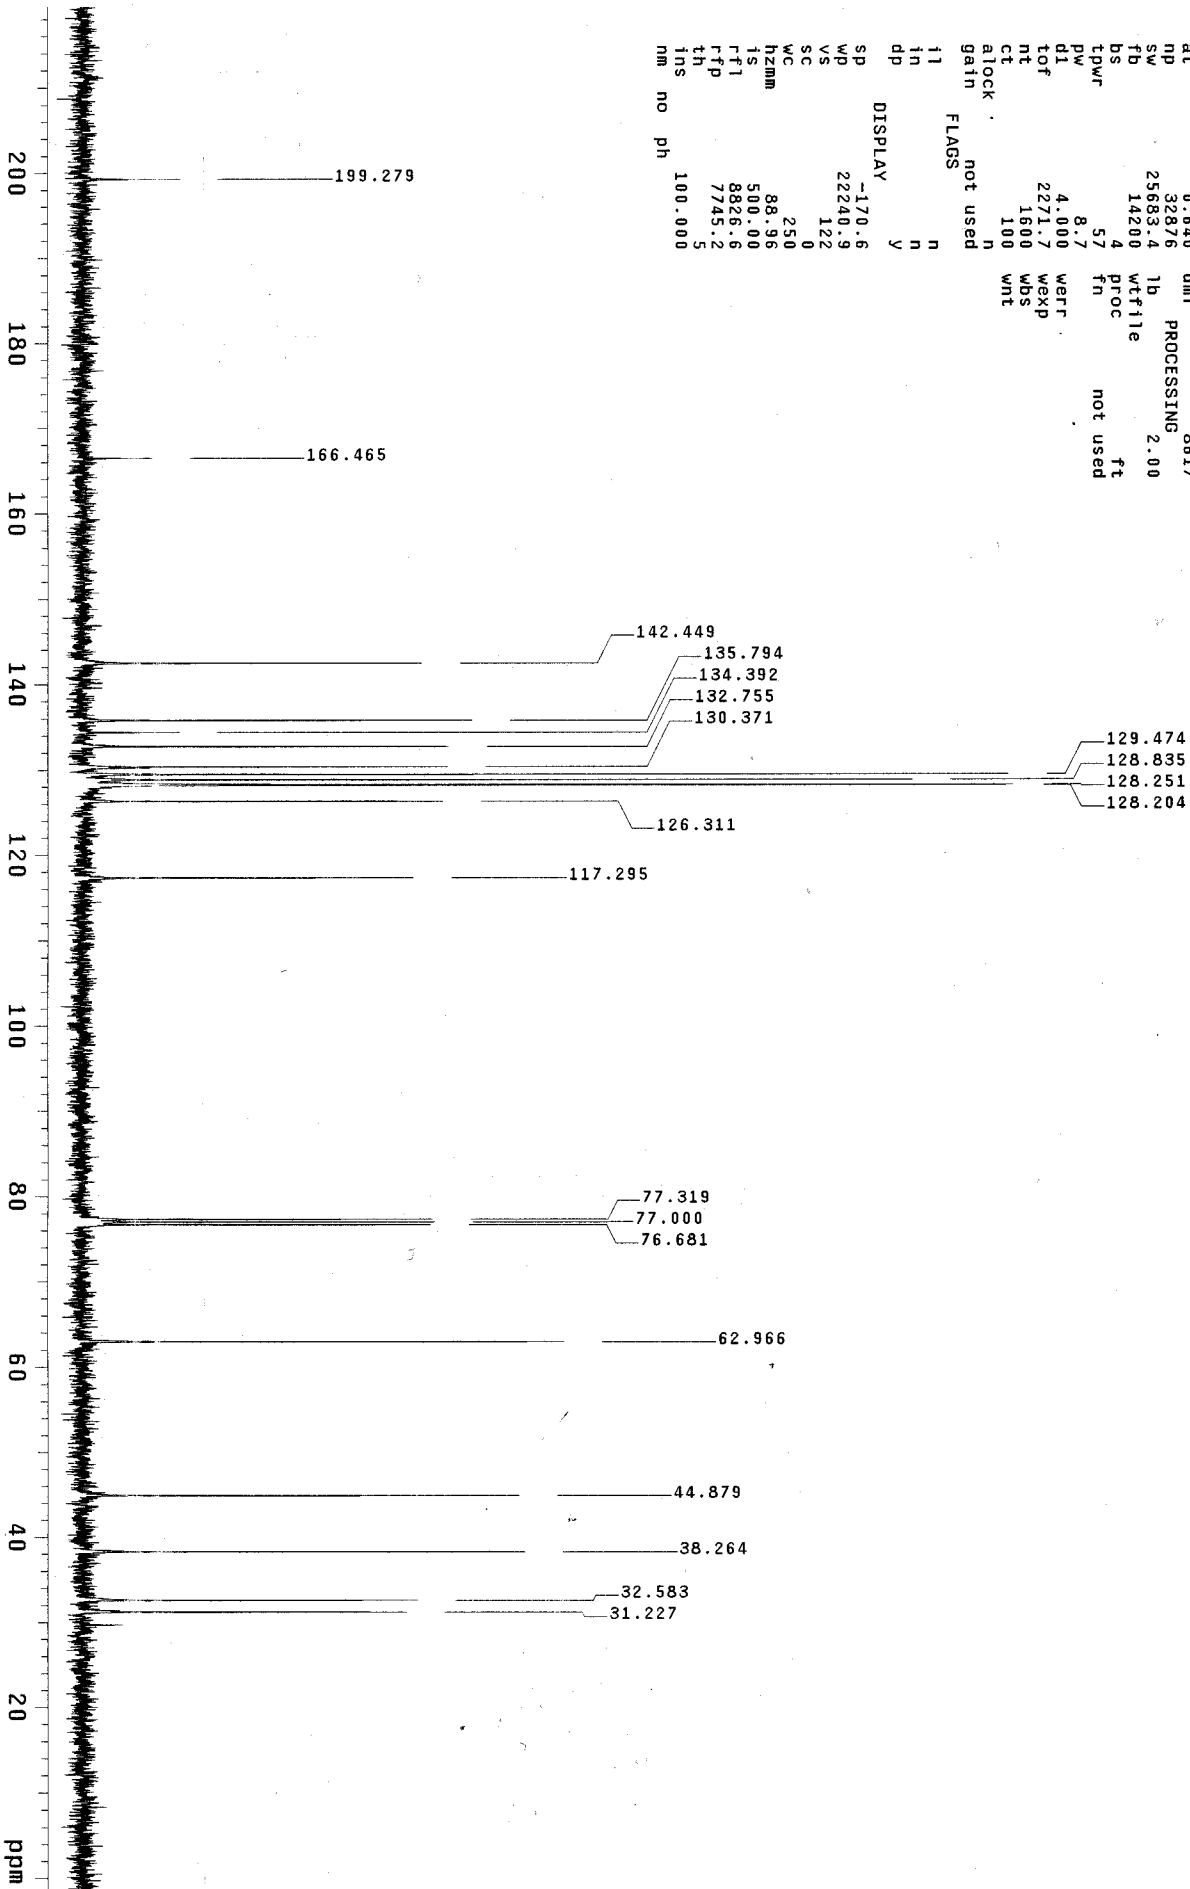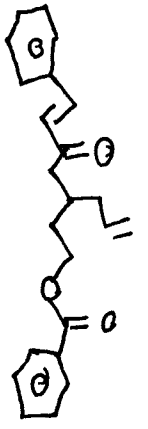

expt1 std1h

SAMPLE DEC. & VT  
date Oct 26 2007 dfreq 0  
solvent CDC13 dn 30  
file /export/home/~ dpwr 0  
jpm/jds/js6-101col~ dof mnn  
SP2.fid dm mnc  
ACQUISITION dmm 200  
sfrq 400.029 dmt  
IN HI wffile  
at 3.000 wffile  
np 35992 proc ft  
sw 5998.8 fn not used  
fb 3400  
bs 4 weff  
tpwr 63 wekp  
pw 7.1 wds  
di 4.000 wnt  
tof 0  
nt 16  
ct 0  
alock not used  
gain not used  
FLAGS  
i1 n  
i2 n  
i3 n  
i4 n  
i5 n  
i6 n  
i7 n  
i8 n  
i9 n  
i10 n  
i11 n  
i12 n  
i13 n  
i14 n  
i15 n  
i16 n  
i17 n  
i18 n  
i19 n  
i20 n  
i21 n  
i22 n  
i23 n  
i24 n  
i25 n  
i26 n  
i27 n  
i28 n  
i29 n  
i30 n  
i31 n  
i32 n  
i33 n  
i34 n  
i35 n  
i36 n  
i37 n  
i38 n  
i39 n  
i40 n  
i41 n  
i42 n  
i43 n  
i44 n  
i45 n  
i46 n  
i47 n  
i48 n  
i49 n  
i50 n  
i51 n  
i52 n  
i53 n  
i54 n  
i55 n  
i56 n  
i57 n  
i58 n  
i59 n  
i60 n  
i61 n  
i62 n  
i63 n  
i64 n  
i65 n  
i66 n  
i67 n  
i68 n  
i69 n  
i70 n  
i71 n  
i72 n  
i73 n  
i74 n  
i75 n  
i76 n  
i77 n  
i78 n  
i79 n  
i80 n  
i81 n  
i82 n  
i83 n  
i84 n  
i85 n  
i86 n  
i87 n  
i88 n  
i89 n  
i90 n  
i91 n  
i92 n  
i93 n  
i94 n  
i95 n  
i96 n  
i97 n  
i98 n  
i99 n  
i100 n

DISPLAY 10.16  
SP 3279.2  
WD 98  
VS 0  
WC 250  
SC 0  
hzm 13.12  
is 2222.54  
rfl 3902.4  
rfp 2896.2  
th 1.000  
tms nm  
ph

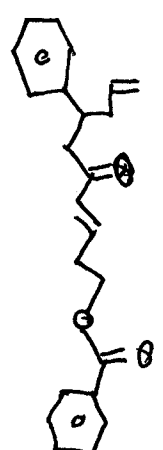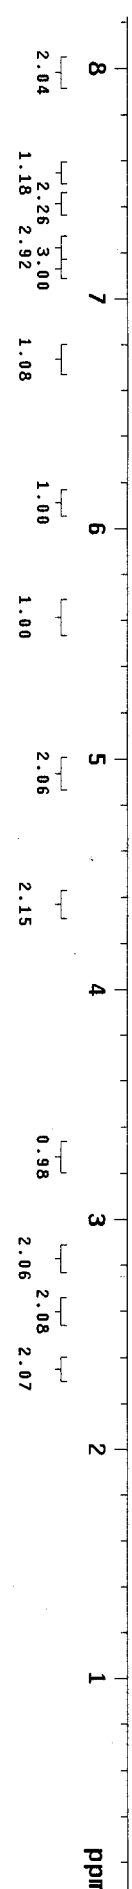

exp2 std13c

SAMPLE DEC. 8 VI 400.029  
 date Oct 26 2007  
 solvent CDCl3  
 file ACQUISITION exp  
 sfreq 100.599  
 in C13  
 at 0.640  
 np 32876  
 sw 25683.4  
 fd 14200  
 bs 4  
 tpwr 57  
 pw 8.7  
 dl 4.000  
 tof 2271.7  
 nt 1600  
 ct 92  
 alock n  
 gain not used  
 flags n  
 in n  
 dp y  
 DISPLAY  
 SD 32.4  
 WD 22004.2  
 VS 182  
 SC 0  
 WC 250  
 hzmm 88.02  
 IS 500.00  
 rfi 8825.8  
 rfp 7745.2  
 tn 10  
 ins no  
 nm 100.000

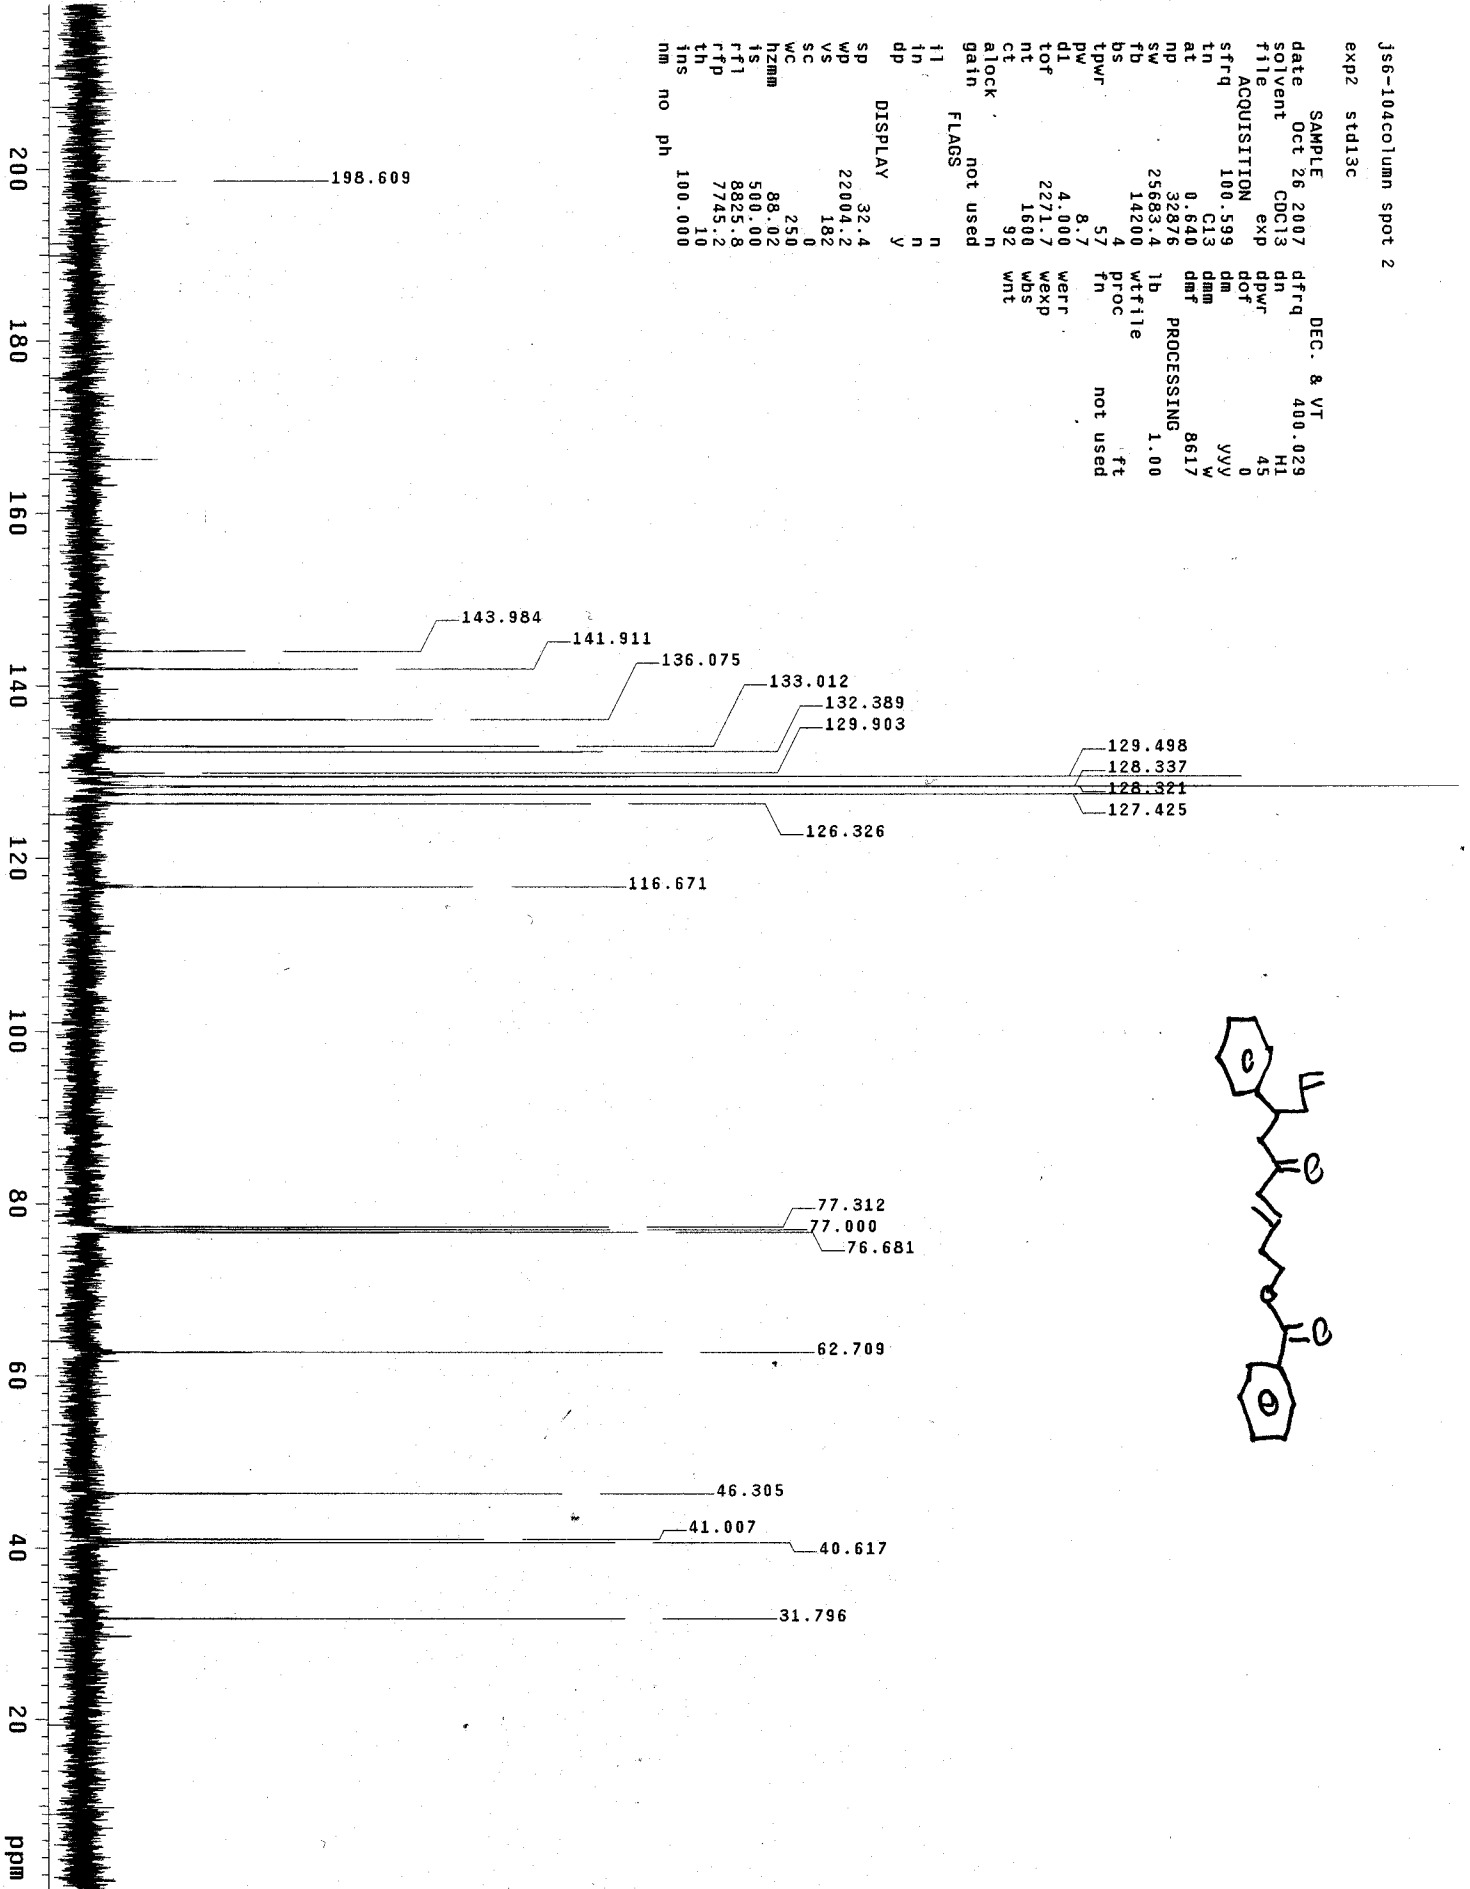

Supplement: NIHMS277957-supplement-1.pdf [file NIHMS277957-supplement-1.pdf]
